# Supplementary material
Source: MDPI journal article supplement (https://www.mdpi.com/2073-4395/12/12/2998)
Supplement: s1 [file s1]

**Supplemental Table S1.** Primers used for qRT-PCR.

| ID | Gene name                         | Sequence (5'-3')                                | Size (bp) |
|----|-----------------------------------|-------------------------------------------------|-----------|
| 1  | Reference gene<br>( <i>EF1a</i> ) | GAACCTCCCAGGCTGATTGT<br>CAAGAGTGAAAGCAAGAAGAGCA | 117       |
| 2  | CL20415.Contig5                   | GGACCACGTCACCTCGTACT<br>GCTCCTGGACCCCTACTTCT    | 91        |
| 3  | CL6462.Contig6                    | TGCGGGGCTGATAAATAAAG<br>CACTGGCATTTCGTTGTATCG   | 131       |
| 4  | CL7025.Contig13                   | CAGTTCCCAGTTCCATCGTT<br>AAGAAGAGGGCAGCTTAGGG    | 122       |
| 5  | CL7117.Contig50                   | CTTCGTGTCCCTCTTTCTCG<br>TTCCTCATGGACAACAACGA    | 112       |
| 6  | CL1681.Contig5                    | CATCGCGTGTTTAAATGTGG<br>ACACGAGTAAGCTCCCCTCA    | 95        |
| 7  | CL4070.Contig3                    | GAGCCTGTTGGCAAAAGAAG<br>CGCCAGTCACACACTGACTT    | 105       |
| 8  | CL20016.Contig13                  | ATCACGCGAGGAAAAGAGAA<br>CACCCATTGTGTGGAGTGAG    | 102       |
| 9  | CL2156.Contig4                    | GCAGGAAGTGCTCCAGATTC<br>GGACTGGCTGACCGAGATAC    | 116       |
| 10 | CL4070.Contig3                    | GAGCCTGTTGGCAAAAGAAG<br>CGCCAGTCACACACTGACTT    | 105       |
| 11 | CL20825.Contig4                   | AGGAGTTGCTCTGGTGGCTA                            | 92        |

---

|    |                  |                                              |     |
|----|------------------|----------------------------------------------|-----|
|    |                  | CTGCCCACAGCTAGAACACA                         |     |
| 12 | CL3131.Contig12  | GCCGCTCGTTATTATTGCTT<br>ACGGACATCGGTACACCACT | 111 |
| 13 | Unigene13953     | CAACTGAATGGGGGAGAAGA<br>TTCCCAAAAGCAGCTACCAT | 113 |
| 14 | Unigene33410     | GCAAGAAGCTGATCACCACA<br>GAGAAGCACGACCTCCTGTC | 100 |
| 15 | Unigene34032     | GCCGCAGATTATTCCATTGT<br>GCCTGATCGATGGAGTTGAT | 96  |
| 16 | CL21417.Contig36 | CCATGTTCAATCCCATTTC<br>CCTAGCAATCACACGCTCAA  | 109 |
| 17 | CL4122.Contig2   | TAGGAAGAGGGGCAAGTCG<br>CCCAGGCGACTGGATAACTA  | 135 |
| 18 | CL199.Contig1    | AAGACCATCGGCATTTCTTG<br>TCGACGGTTACATGACAGGA | 116 |
| 19 | CL16112.Contig1  | CCACGACTGGAAAAAGGTGT<br>GAGTACGTCGAGGAGGCAAG | 120 |
| 20 | CL9242.Contig16  | TTAGCTGCCTCACCGTCTTT<br>TCGGCACTGCTATGATGAAG | 90  |
| 21 | CL9242.Contig17  | GTTGTCAGCATTCCAGCTCA<br>TGCTAGCGTCAAGAGGGATT | 122 |
| 22 | Unigene36876     | GGAGGATGAGGAGGAAAAGG<br>TCGTGGAAGCTCTCCATCTC | 105 |

---

|    |                 |                                              |    |
|----|-----------------|----------------------------------------------|----|
| 23 | CL17280.Contig5 | GCGCGTGTAAATAGCCGTAT<br>GATCCCTCCCTCCTTTCATC | 95 |
| 24 | ACCcase         | TCAGAGGCATTGATGACAGC<br>TACTGTCTTCGCCCATCCTT | 95 |

**Supplemental Table S2.** Primers used for candidate genes cloning.

| ID | Gene name       | Sequence (5'-3')                                          | Size (bp) |
|----|-----------------|-----------------------------------------------------------|-----------|
| 1  | CL7117.contig50 | ATGGATTACATGAGGCTTGATATC<br>TTATCCTTTCGCCTCGTGCCGCC       | 1107      |
| 2  | CL16112.contig1 | ATGCCTCACATTTTACTCTCTTTATTC<br>TTAACTCTGAAAGCTCTGCAATGG   | 885       |
| 3  | Unigene 36876   | ATGGCGATGGTATCGTCAACATCC<br>TTACAACTATGGCGCATGTACATC      | 915       |
| 4  | Unigene33410    | ATGGTTGACTGGTGGTACCTATTTGC<br>TTATCTTCTCCCCGCTCACCTATACTC | 1740      |

**Supplemental Table S3.** Clean reads quality metrics.

| Sample | Total raw<br>reads (Mb) | Total clean<br>reads (Mb) | Total clean<br>bases (Gb) | Clean reads<br>Q20 (%) | Clean reads<br>Q30 (%) | Clean reads<br>ratio (%) |
|--------|-------------------------|---------------------------|---------------------------|------------------------|------------------------|--------------------------|
| TSR-1A | 39.2                    | 29.38                     | 4.41                      | 97.73                  | 93                     | 74.95                    |
| TSR-2A | 40.83                   | 29.79                     | 4.47                      | 97.83                  | 93.23                  | 72.96                    |

|        |       |       |      |       |       |       |
|--------|-------|-------|------|-------|-------|-------|
| TSR-3A | 37.56 | 29.45 | 4.42 | 97.81 | 93.16 | 78.4  |
| TSS-1A | 40.83 | 30.03 | 4.5  | 97.8  | 93.12 | 73.56 |
| TSS-2A | 42.46 | 30.34 | 4.55 | 97.77 | 93.06 | 71.45 |
| TSS-3A | 38.89 | 28.55 | 4.28 | 97.77 | 93.04 | 73.42 |
| TTR-1A | 39.2  | 29.97 | 4.5  | 97.72 | 92.86 | 76.47 |
| TTR-2A | 39.2  | 30.45 | 4.57 | 97.93 | 93.46 | 77.68 |
| TTR-3A | 39.2  | 30.31 | 4.55 | 97.81 | 93.18 | 77.33 |
| TTS-1A | 38.83 | 29.39 | 4.41 | 97.42 | 92.19 | 75.69 |
| TTS-2A | 38.83 | 29.99 | 4.5  | 97.06 | 91.29 | 77.23 |
| TTS-3A | 40.46 | 30.11 | 4.52 | 97.67 | 92.84 | 74.42 |
| USR-1A | 40.83 | 30.53 | 4.58 | 97.73 | 93    | 74.77 |
| USR-2A | 39.2  | 29.49 | 4.42 | 97.87 | 93.34 | 75.23 |
| USR-3A | 34.26 | 28.07 | 4.21 | 96.97 | 91.47 | 81.92 |
| USS-1A | 40.83 | 30.44 | 4.57 | 97.93 | 93.49 | 74.55 |
| USS-2A | 40.83 | 30.3  | 4.54 | 97.79 | 93.1  | 74.21 |
| USS-3A | 40.83 | 30.38 | 4.56 | 97.82 | 93.2  | 74.42 |
| UTR-1A | 39.16 | 28.92 | 4.34 | 97.8  | 93.12 | 73.86 |
| UTR-2A | 42.46 | 30.52 | 4.58 | 97.58 | 92.62 | 71.87 |
| UTR-3A | 39.2  | 30.14 | 4.52 | 97.8  | 93.17 | 76.89 |
| UTS-1A | 38.83 | 29.68 | 4.45 | 97.78 | 93.06 | 76.45 |
| UTS-2A | 38.82 | 29.67 | 4.45 | 97.83 | 93.19 | 76.43 |
| UTS-3A | 37.56 | 29.86 | 4.48 | 97.87 | 93.3  | 79.5  |

**Supplemental Table S4.** Quality metrics of the unigenes.

| <b>Sample</b> | <b>Total number</b> | <b>Total length</b> | <b>Mean length</b> | <b>N50</b> | <b>N70</b> | <b>N90</b> | <b>GC (%)</b> |
|---------------|---------------------|---------------------|--------------------|------------|------------|------------|---------------|
| TSR-1A        | 54370               | 48155425            | 885                | 1436       | 880        | 353        | 51.18         |
| TSR-2A        | 56811               | 49665921            | 874                | 1414       | 864        | 349        | 51.17         |
| TSR-3A        | 55479               | 45874690            | 826                | 1321       | 806        | 331        | 51.42         |
| TSS-1A        | 67598               | 53733850            | 794                | 1274       | 759        | 317        | 51.85         |
| TSS-2A        | 67591               | 53800123            | 795                | 1287       | 760        | 316        | 51.38         |
| TSS-3A        | 60250               | 46293391            | 768                | 1238       | 726        | 307        | 51.66         |
| TTR-1A        | 64331               | 57190849            | 889                | 1463       | 904        | 349        | 51            |
| TTR-2A        | 64739               | 56552820            | 873                | 1413       | 876        | 348        | 51.71         |
| TTR-3A        | 63356               | 53139917            | 838                | 1345       | 827        | 336        | 52.13         |
| TTS-1A        | 68716               | 52091776            | 758                | 1216       | 711        | 301        | 52.31         |
| TTS-2A        | 69324               | 51967974            | 749                | 1200       | 696        | 298        | 51.65         |
| TTS-3A        | 70729               | 57757302            | 816                | 1309       | 787        | 326        | 52.18         |
| USR-1A        | 56268               | 47916815            | 851                | 1383       | 843        | 339        | 51.24         |
| USR-2A        | 53519               | 44596480            | 833                | 1338       | 816        | 335        | 51.28         |
| USR-3A        | 51899               | 40056053            | 771                | 1207       | 733        | 314        | 51.93         |
| USS-1A        | 71813               | 57927245            | 806                | 1303       | 774        | 318        | 51.02         |
| USS-2A        | 75657               | 61008012            | 806                | 1298       | 771        | 320        | 51.2          |
| USS-3A        | 78336               | 64247093            | 820                | 1330       | 789        | 322        | 50.84         |
| UTR-1A        | 60243               | 55009993            | 913                | 1490       | 930        | 364        | 51.07         |
| UTR-2A        | 57427               | 50541973            | 880                | 1411       | 876        | 356        | 51.84         |
| UTR-3A        | 62391               | 50556472            | 810                | 1331       | 790        | 316        | 51.99         |

|             |        |          |      |      |      |     |       |
|-------------|--------|----------|------|------|------|-----|-------|
| UTS-1A      | 69628  | 54711519 | 785  | 1258 | 750  | 314 | 51.7  |
| UTS-2A      | 76395  | 58676682 | 768  | 1236 | 722  | 304 | 51.66 |
| UTS-3A      | 75796  | 57951710 | 764  | 1216 | 717  | 305 | 52.03 |
| All-Unigene | 218885 | 2.57E+08 | 1175 | 1827 | 1261 | 564 | 50.86 |
