# Supplementary material
Source: MDPI journal article supplement (https://www.mdpi.com/2073-4395/12/12/2998)
Supplement: s1 [file s1]

Archive with 5 entries (5 files):
- Supplemental Figures.pdf
- Supplemental Table S5.xlsx
- Supplemental Table S6.xlsx
- Supplemental Table S7.xlsx
- Supplemental Tables S1-S4.pdf
