# Supplementary material
Source: MDPI journal article supplement (https://www.mdpi.com/2073-4395/12/12/2998)
Supplement: s1 [file s1 › Supplemental Table S5.xlsx]

## Sheet: P450
		TSS-VS-TSR					USS-VS-USR						E-J
Unigene	Length	TSS-Expression	TSR-Expression	log2FoldChange(TSR/TSS)	Pvalue	Padj	USS-Expression	USR-Expression	log2FoldChange(USR/USS)	Pvalue	Padj
CL19928.Contig14_All	1951	0	83.1	7.61921	1.25e-09	4.05e-08	5.57	80.96	4.40313	1.1761e-14	1.10851e-12		3.21608
CL2156.Contig4_All	1852	0	33.19	6.54864	6.5e-07	1.08e-05	3.13	43.48	4.2463	1.99512e-10	8.56847e-09		2.30234
CL20021.Contig11_All	1783	0.29	40.34	5.79209	5.25e-08	1.16e-06	1.05	20.97	3.65224	0.00595678	0.0283043		2.13985
CL7657.Contig2_All	1891	5.41	84	3.71133	2.01e-10	7.7e-09	27.59	54.59	1.57252	0.000448188	0.00323304		2.13881
CL20016.Contig13_All	2456	0	13.96	5.4398	0.000110939	0.000956079	0.35	7.05	3.62088	0.00621	0.0293209		1.81892
CL8305.Contig1_All	1691	3.7	111.25	4.34887	1.36e-09	4.35e-08	27.14	116.02	2.6815	2.46643e-09	8.14549e-08		1.66737
Unigene31229_All	3095	0.93	35.18	4.51625	8.63e-07	1.38e-05	5.01	25.15	2.85325	1.34873e-05	0.000159354		1.66299
CL4070.Contig3_All	1972	1.47	33.72	3.72532	8.28e-05	0.000743295	7.5	23.37	2.16999	0.00612628	0.0289839		1.55533
CL2133.Contig1_All	1784	0.34	51.68	6.12929	9.01e-09	2.4e-07	0.79	20.52	4.61447	3.97576e-05	0.000406498		1.51482
CL19193.Contig6_All	1715	4.53	44.97	3.11415	4.78e-06	6.23e-05	10.13	21.18	1.67251	0.00923845	0.0406293		1.44165
Unigene15376_All	1094	0	8.33	4.7583	0.00124278	0.00752798	0.38	5.27	3.42549	0.00903572	0.0398892		1.3328
CL138.Contig14_All	1756	0.59	23.94	4.36721	2.71e-05	0.00028227	6.09	40.77	3.14399	2.02717e-06	3.05622e-05		1.22322
CL1644.Contig15_All	1761	15.41	157.22	3.14761	2.22e-10	8.41e-09	43.07	115.03	1.95078	5.58825e-08	1.297e-06		1.19683
CL14001.Contig10_All	1893	2.4	94.54	4.97707	9.62e-14	6.9e-12	8.34	86.67	3.82944	8.29963e-13	5.67214e-11		1.14762
CL21463.Contig52_All	1906	0	18.8	5.81532	2.39e-05	0.000253918	0.38	14.29	4.71759	7.4735e-05	0.000700138		1.09774
Unigene62143_All	1724	32.14	179.3	2.41444	1.17e-06	1.8e-05	77.23	125.11	1.32285	0.000853158	0.00556993		1.09159
Unigene41000_All	998	1.37	25.03	3.72682	5.81e-05	0.000547295	3.54	17.14	2.71411	0.00749665	0.0341854		1.01272
CL18045.Contig11_All	2087	2.01	56.05	4.48095	2.71e-11	1.24e-09	5.47	51.46	3.53882	3.23393e-07	6.10801e-06		0.942123
CL7831.Contig2_All	1163	14.2	68.3	2.08574	4.39e-06	5.77e-05	54.4	85.82	1.22919	0.00226357	0.0126638		0.856543
Unigene62146_All	1815	58.55	629.91	3.35056	2.85e-13	1.89e-11	117.11	434.44	2.50836	1.67775e-15	1.82121e-13		0.842203
Unigene21820_All	4409	0	33.97	6.57498	5.6e-07	9.43e-06	0	14.94	5.76002	3.63164e-05	0.000376024		0.814961
Unigene62142_All	1740	68.64	315.15	2.14833	3.44e-06	4.67e-05	128.67	227.02	1.43051	4.02951e-07	7.43211e-06		0.717812
CL17157.Contig3_All	1834	0.71	16.12	3.88364	0.000389698	0.00281574	2.25	17.37	3.20846	0.00177703	0.0103365		0.675183
Unigene12408_All	2105	313.55	1809.38	2.41976	7.06e-07	1.16e-05	549.42	1194.36	1.74686	1.34455e-08	3.6738e-07		0.672902
CL7831.Contig21_All	1816	11.71	73.91	2.41872	1.23e-05	0.000142132	52.83	138.5	1.92309	2.43581e-07	4.76113e-06		0.495625
Unigene33285_All	1585	0.74	30.5	4.83357	7.38e-07	1.21e-05	1.4	27.6	4.34955	8.34496e-07	1.40782e-05		0.484019
CL20021.Contig6_All	1796	0	30.24	6.38007	1.72e-06	2.55e-05	0.38	33	6.02067	1.07814e-08	3.02126e-07		0.359408
CL21463.Contig48_All	2607	0	20.9	5.90894	1.71e-05	0.000189413	0	14.33	5.62264	8.13784e-05	0.000753358		0.2863
CL20016.Contig21_All	2503	1.11	20.96	3.8455	0.000256904	0.00196765	1.14	11.78	3.58903	0.000383055	0.00283129		0.256466
CL1644.Contig28_All	1727	26.31	80.32	1.46795	0.000448787	0.00317474	49.79	80.6	1.25631	0.000810797	0.00533585		0.211644
CL20021.Contig10_All	1835	0	5.49	4.15635	0.00695213	0.031543	0.35	7.44	3.94497	0.00126421	0.00775244		0.211372
CL19928.Contig10_All	1857	58.26	202.26	1.69102	0.00506558	0.0243227	77.23	138.74	1.48266	0.000919245	0.00592625		0.208352
CL7831.Contig16_All	601	5.43	42.8	2.65357	9.53e-05	0.000839005	11.7	44.66	2.44592	1.20822e-06	1.94562e-05		0.207652
CL20021.Contig8_All	1814	0.37	19.48	4.85025	1.83e-05	0.00020063	1.17	25.94	4.69138	1.27285e-07	2.68914e-06		0.158872
CL7831.Contig3_All	1863	93.18	339.4	1.79595	7.63e-06	9.37e-05	213.18	485.22	1.70803	8.34254e-05	0.000769979		0.087917
CL9863.Contig7_All	1868	0	4.78	3.9899	0.0103088	0.0435741	1.14	17.52	3.91385	0.000943335	0.00605443		0.0760453
CL20016.Contig25_All	1942	0	106.79	8.01799	5.49e-11	2.36e-09	0	76.64	7.94218	1.07953e-10	4.91849e-09		0.0758096
CL1644.Contig20_All	1306	27.53	81.17	1.38421	0.000303518	0.00227267	47.42	78.47	1.32047	0.000646938	0.00441096		0.0637303
CL1644.Contig12_All	1724	21.9	89.15	1.9495	3.76e-05	0.000375172	31.56	83.07	1.89346	5.7682e-05	0.000561879		0.0560439
CL4943.Contig2_All	1718	55.36	178.69	1.5858	8.17e-06	9.94e-05	69.62	143.28	1.566	0.00020071	0.00163252		0.0197973
CL17743.Contig16_All	5544	35.94	99.21	1.37007	0.000123439	0.00104846	65.76	111.49	1.36119	1.90336e-05	0.000214618		0.00888056
CL397.Contig21_All	4105	82.1	220.18	1.27021	0.0019463	0.0109654	116.91	184.04	1.26911	5.1255e-05	0.000506995		0.00109713
CL2156.Contig1_All	1797	0	122.99	8.14547	3.18e-11	1.43e-09	0	86.64	8.14649	2.89605e-11	1.47647e-09		-0.00101506
Unigene29225_All	4676	76.58	406	2.30694	4.61e-08	1.03e-06	110.57	396.7	2.33811	9.77539e-08	2.12819e-06		-0.0311731
CL20016.Contig6_All	2468	0	48.75	6.95836	9.59e-08	1.98e-06	0	34.65	7.05908	3.30554e-08	8.17806e-07		-0.100717
CL20016.Contig1_All	2231	0	34.31	6.52301	1.01e-06	1.59e-05	0	25.48	6.66222	3.11548e-07	5.90576e-06		-0.139217
CL18045.Contig4_All	1960	9.16	33.13	1.73254	0.0032421	0.0168091	14	38.63	1.90053	0.00100523	0.00638754		-0.167986
Unigene51542_All	721	4.55	21.8	1.99113	0.00508001	0.0243775	6.24	18.75	2.16407	0.00103199	0.00653216		-0.172936
CL14001.Contig5_All	726	2.88	21.64	2.71331	0.0025883	0.0139499	6.27	31.63	2.89235	7.55735e-07	1.29431e-05		-0.179049
Unigene27620_All	1241	0	8.42	4.76292	0.0012082	0.00735364	0	7.57	4.96192	0.000664171	0.00450692		-0.199008
CL21463.Contig85_All	3581	0.34	21.14	4.82325	6.82e-05	0.000629634	0	8.6	5.05606	0.000507058	0.00358898		-0.232808
CL20016.Contig19_All	2332	0	7.1	4.05204	0.0100787	0.0428162	0	6.45	4.30554	0.00590133	0.0280843		-0.2535
Unigene35928_All	1531	4.94	49.83	3.19433	6.96e-06	8.64e-05	3.15	34.21	3.45128	0.000395176	0.00290854		-0.256956
Unigene22896_All	2815	0	17.97	5.7659	3.01e-05	0.000310363	0	15.35	6.02806	8.41871e-06	0.000105566		-0.262158
CL21173.Contig16_All	3162	364.78	1137.43	1.54389	7.09e-06	8.78e-05	481.81	1169.23	1.83735	2.74552e-10	1.14054e-08		-0.29346
CL1644.Contig6_All	1742	38.76	116.56	1.46067	8.53e-05	0.000762367	46.35	104.82	1.7632	1.36908e-08	3.73309e-07		-0.302526
CL4134.Contig9_All	1969	40.28	184.57	2.13183	7.13e-06	8.82e-05	55.01	217.63	2.46434	4.68502e-08	1.11099e-06		-0.332513
CL20016.Contig29_All	2042	77.77	227.17	1.4138	4.03e-08	9.14e-07	79.99	185.39	1.75063	4.96694e-07	8.94645e-06		-0.336825
CL20016.Contig33_All	2390	0	72.77	7.43075	5.12e-09	1.44e-07	0	60.97	7.78363	2.22215e-10	9.44176e-09		-0.352881
CL2133.Contig13_All	1831	5.89	94.92	3.8656	1.55e-13	1.07e-11	8.05	102.29	4.21885	5.58935e-21	1.29091e-18		-0.353257
CL9098.Contig3_All	2280	38.98	131.71	1.56852	0.00384084	0.0193547	58.99	160.54	1.93775	0.00181666	0.0105308		-0.36923
CL9098.Contig2_All	2402	44.31	139.67	1.42814	0.00267015	0.0143168	78.54	211.26	1.82005	0.0041678	0.0210635		-0.391907
CL4144.Contig7_All	1800	40.43	261.04	2.61082	8.91e-10	2.97e-08	40.53	219.53	3.03124	2.30594e-25	8.78317e-23		-0.420418
CL15719.Contig2_All	2349	153.52	420.5	1.29078	7.37e-06	9.08e-05	122.97	273.66	1.78787	3.83108e-10	1.53819e-08		-0.497096
Unigene18875_All	1736	17.01	66.8	1.87251	4.07e-05	0.000401981	15.19	53.83	2.38042	8.47188e-07	1.42544e-05		-0.507905
Unigene25590_All	4413	7.71	50.03	2.60879	4.73e-06	6.16e-05	6.27	40.6	3.21917	5.59589e-08	1.2986e-06		-0.610383
CL20016.Contig7_All	2490	0	20.49	5.28426	0.000400333	0.00288142	0	16.11	5.91634	2.1768e-05	0.000240948		-0.632079
CL15962.Contig6_All	2600	6.72	48.6	2.63163	0.00115987	0.00710592	3.01	22.23	3.302	1.54495e-05	0.000179287		-0.670377
CL4144.Contig6_All	1725	37.88	228.83	2.53165	3.54e-07	6.29e-06	36.78	231.6	3.22457	1.00225e-29	5.54154e-27		-0.69292
CL2053.Contig15_All	1879	10.34	39.41	1.82962	0.000243785	0.00188074	9.19	40.87	2.55972	0.000439631	0.0031823		-0.730102
CL4134.Contig6_All	1837	42.92	104.14	1.14595	0.00292947	0.0154559	48.18	124.54	1.91	1.77774e-07	3.60559e-06		-0.764049
CL7110.Contig9_All	1794	0	116.62	7.96739	1.58e-10	6.2e-09	0	171.36	8.75361	6.72737e-13	4.67404e-11		-0.786213
CL2156.Contig9_All	1850	27.23	80.61	1.45363	0.00222405	0.0122728	20.85	69.43	2.25308	8.69428e-06	0.000108498		-0.799448
CL20016.Contig20_All	2305	0.37	90.44	6.93679	6.1e-12	3.18e-10	0	61.37	7.76388	3.50282e-10	1.42138e-08		-0.827089
CL14001.Contig8_All	1895	4.14	45.54	3.22241	7.87e-06	9.63e-05	3.83	47.62	4.06924	1.12012e-10	5.08583e-09		-0.846828
Unigene43902_All	1786	7.53	29.74	1.75547	0.00611659	0.0284252	6.38	29.19	2.659	8.45331e-06	0.000105899		-0.90353
CL21463.Contig81_All	2918	0	7.59	4.64266	0.00177906	0.0101734	0	10.97	5.57643	6.50367e-05	0.000622587		-0.933779
Unigene22165_All	3170	0	22.59	5.95932	1.41e-05	0.000160019	0	35.57	7.03114	4.21883e-08	1.01248e-06		-1.07182
CL7831.Contig1_All	1745	3.41	66.1	3.7129	0.000867555	0.00555715	4.1	90.08	4.88107	1.48871e-09	5.18527e-08		-1.16818
Unigene26508_All	3179	62.92	329	2.27369	2.92e-05	0.000301543	34.64	265.39	3.48381	3.39398e-30	2.00598e-27		-1.21012
Unigene33113_All	1708	24.3	129.03	2.35695	0.000317845	0.00236513	13.74	160.2	3.84524	2.56852e-07	4.98809e-06		-1.48829
CL2133.Contig4_All	1909	0.29	14.27	3.86961	0.00601051	0.0280349	0.35	61	6.87735	8.47556e-12	4.83437e-10		-3.00774
CL771.Contig16_All	2275	14.83	440.34	4.71761	3.44e-10	1.25e-08	0	293.02	9.72198	1.38439e-17	2.0368e-15		-5.00437

## Sheet: glu
		TSS-VS-TSR					USS-VS-USR						E-J
Unigene	Length	TSS-Expression	TSR-Expression	log2FoldChange(TSR/TSS)	Pvalue	Padj	USS-Expression	USR-Expression	log2FoldChange(USR/USS)	Pvalue	Padj
CL19209.Contig3_All	2947	0	105.64	7.81741	4.98e-10	1.74e-08	0.38	24.31	5.62409	1.99679e-07	3.99877e-06		2.19332
CL7025.Contig13_All	1688	0.34	22.79	4.88406	6.69e-05	0.000618621	1.64	11.62	3.18988	0.00257219	0.0140883		1.69418
CL7117.Contig31_All	1909	0	189.93	8.76902	9.92e-14	7.09e-12	1.08	178.57	7.40777	6.36068e-23	1.82619e-20		1.36125
CL7117.Contig24_All	1576	3.97	91.1	4.26747	1.82e-15	1.73e-13	8.26	46.59	2.98313	5.15203e-05	0.000509442		1.28433
CL1370.Contig32_All	1911	0	31.41	6.49473	8.34e-07	1.34e-05	0.41	18.43	5.22076	3.81835e-06	5.30453e-05		1.27397
CL7117.Contig50_All	1846	1.79	167.08	6.25487	1.33e-21	2.89e-19	3.56	102.7	5.0766	8.84072e-15	8.48689e-13		1.17827
CL11504.Contig5_All	1027	25.63	239.69	2.81874	0.000410889	0.00294541	52.02	136.4	1.91595	0.000351548	0.00263241		0.902787
CL21375.Contig5_All	1467	21.77	133.33	2.53607	5.33e-11	2.3e-09	37.23	76.34	1.65846	0.000295592	0.00226995		0.877616
Unigene9587_All	6623	3.13	102.7	4.80175	1.31e-15	1.27e-13	5.83	65.66	4.02767	3.63446e-15	3.72803e-13		0.774082
CL7117.Contig34_All	1294	13.97	103.62	2.64528	3.97e-08	9.02e-07	32.45	78.51	1.88598	2.30068e-05	0.000252702		0.759302
CL3311.Contig4_All	816	0.88	48.68	5.03861	3.17e-09	9.35e-08	2.28	38.03	4.33649	3.69463e-07	6.88258e-06		0.702119
CL20976.Contig2_All	990	0.68	190.75	7.31158	9.69e-16	9.59e-14	1.58	139.61	6.77974	6.99346e-22	1.79984e-19		0.53184
CL7025.Contig11_All	1492	0	16.92	5.67809	4.47e-05	0.000435843	0	8.89	5.29787	0.000191103	0.0015638		0.38022
CL7131.Contig1_All	1083	0	8.51	4.54768	0.00278816	0.0148386	0	4.11	4.17117	0.00646654	0.030325		0.376509
Unigene30056_All	2750	3.53	54.04	3.59719	5.28e-09	1.48e-07	6.71	44.57	3.24728	1.21782e-06	1.95923e-05		0.349907
CL18654.Contig2_All	988	5.54	26.52	2.12686	0.000718704	0.00474145	10.83	24.42	1.79742	0.00850556	0.037915		0.329438
Unigene58228_All	1084	4.14	295.06	5.58185	1.9e-08	4.68e-07	3.74	114.29	5.30818	5.41516e-16	6.26295e-14		0.273668
CL7117.Contig7_All	2094	0	8.66	4.82487	0.000997742	0.00625787	0	5.27	4.59073	0.0020151	0.0114905		0.23414
CL1370.Contig5_All	1889	1.4	19.3	3.40495	0.00025521	0.00195608	1.17	9.4	3.19896	0.00220598	0.0124076		0.205995
CL7117.Contig39_All	1843	0	21.26	5.98161	1.11e-05	0.000129895	0	13.97	5.79963	2.73992e-05	0.000295233		0.181985
Unigene70076_All	1478	33.27	89.98	1.32182	0.000737492	0.00484422	52.1	75.67	1.14215	0.00238437	0.0132154		0.17967
Unigene58239_All	894	4.73	194.83	4.84514	6.96e-07	1.14e-05	2.6	56.47	4.73475	1.37278e-09	4.82959e-08		0.110391
CL19209.Contig2_All	1425	1.71	65.55	4.82474	1.34e-09	4.31e-08	2.57	54.76	4.71959	1.0677e-12	7.15429e-11		0.10515
CL3311.Contig12_All	1219	1.84	52.48	4.52202	7.53e-07	1.23e-05	2.87	45.06	4.4242	5.49114e-08	1.27706e-06		0.0978142
CL7117.Contig45_All	888	42.27	116.76	1.35355	5.79e-05	0.000546267	66.96	101.11	1.25771	0.00351184	0.0182643		0.0958399
CL5582.Contig5_All	2197	39.06	173.36	2.02307	7.57e-12	3.87e-10	39.96	106.05	1.96282	7.35295e-06	9.38989e-05		0.0602497
CL3707.Contig8_All	1515	0.29	92.26	6.9489	4.57e-12	2.44e-10	0.76	104.5	7.03255	2.16379e-16	2.65862e-14		-0.0836516
Unigene11399_All	1302	16.68	60.58	1.79423	0.000153387	0.00126428	21.56	54.56	1.9162	0.000134462	0.00116041		-0.12197
CL7025.Contig9_All	1606	6.89	46.5	2.60723	0.000535068	0.00368672	5.33	27.77	2.88354	2.12023e-05	0.000235539		-0.276309
Unigene14255_All	909	23.59	104.52	2.05009	4.16e-08	9.4e-07	24.95	84.24	2.37964	5.00217e-07	9.00138e-06		-0.329548
CL7117.Contig2_All	1549	18.16	234.44	3.49855	5.01e-23	1.28e-20	17.92	181.03	3.94235	1.18517e-25	4.60636e-23		-0.443805
CL19209.Contig1_All	1438	0	43.88	6.88655	1.13e-07	2.28e-06	0	45.34	7.41713	2.91428e-09	9.42123e-08		-0.530573
CL7025.Contig8_All	1510	0	10.48	5.0204	0.000541723	0.00372607	0	13.93	5.57209	0.00010875	0.000967309		-0.551693
Unigene31384_All	1665	352.24	1179.99	1.6758	0.000744244	0.00487979	184.76	640.13	2.2891	1.20881e-09	4.31652e-08		-0.613308
CL1489.Contig8_All	1101	139.83	529.32	1.80468	8.75e-09	2.34e-07	139.83	524.27	2.43629	2.82224e-14	2.52869e-12		-0.631612
CL1489.Contig6_All	1055	333.42	1324.47	1.89366	1.06e-15	1.04e-13	313.71	1246.92	2.54555	2.18533e-23	6.71272e-21		-0.651897
Unigene33078_All	1236	0	447.11	9.55049	1.23e-15	1.2e-13	0	440.31	10.2253	3.47408e-20	7.21775e-18		-0.674775
CL3311.Contig9_All	1123	0	35.18	6.35348	3.08e-06	4.24e-05	0	38.36	7.15867	2.13193e-08	5.52909e-07		-0.80519
CL1489.Contig7_All	1087	352.71	1121.84	1.56622	8.96e-11	3.67e-09	275.8	1074.56	2.52768	2.39744e-23	7.31185e-21		-0.961461
CL11504.Contig4_All	923	0	15.91	5.32973	0.000228073	0.00177616	0	19.95	6.3127	2.59052e-06	3.78027e-05		-0.982969
CL3707.Contig10_All	1272	7.09	88.62	3.52439	1.63e-07	3.16e-06	5.19	84.43	4.56248	1.42191e-15	1.5623e-13		-1.0381
CL1489.Contig11_All	1263	148.73	787.72	2.29846	4.26e-20	7.66e-18	109.27	798.89	3.45363	1.35135e-57	4.13613e-54		-1.15517
Unigene11004_All	2829	0.74	47.97	5.50062	2.34e-09	7.13e-08	0	27.23	6.72608	2.39251e-07	4.68343e-06		-1.22546
CL7117.Contig32_All	1896	0.59	322.85	8.1118	3.42e-23	8.98e-21	0	210.92	9.36222	2.52068e-16	3.07508e-14		-1.25042
CL10495.Contig6_All	932	3.74	72.36	4.0509	6.79e-11	2.86e-09	0.38	24.96	5.55763	1.43559e-06	2.26037e-05		-1.50673
CL8806.Contig1_All	1277	34.55	108.5	1.46086	0.00111481	0.00686976	20.34	124.96	3.19882	1.08037e-19	2.12604e-17		-1.73796
CL7117.Contig44_All	1484	8.51	61.48	2.71354	6.49e-08	1.4e-06	2.28	50.17	4.83661	1.39578e-12	9.16976e-11		-2.12306
CL3311.Contig3_All	942	3.88	25.12	2.542	0.000710656	0.00469822	0.38	20.34	5.36326	1.74576e-06	2.68173e-05		-2.82126
CL7117.Contig25_All	1823	2.04	30.16	3.44772	0.000420411	0.00300024	0	30.08	6.77467	2.62749e-07	5.08705e-06		-3.32695

## Sheet: gly
		TSS-VS-TSR					USS-VS-USR						E-J
Unigene	Length	TSS-Expression	TSR-Expression	log2FoldChange(TSR/TSS)	Pvalue	Padj	USS-Expression	USR-Expression	log2FoldChange(USR/USS)	Pvalue	Padj
CL1681.Contig5_All	3010	0	56.05	7.21387	1.45e-08	3.68e-07	6.47	48.31	3.12383	0.00270695	0.014687		4.09005
CL20719.Contig1_All	1708	17.77	602.24	4.71319	1.27e-07	2.53e-06	62.32	352.48	3.0336	6.78553e-06	8.75661e-05		1.67959
Unigene22843_All	1281	25.48	391.59	3.81474	8.06e-34	5.72e-31	67.01	278.95	2.69266	4.13431e-16	4.85362e-14		1.12208
CL21009.Contig11_All	1548	2.43	157.78	5.72606	1.19e-19	1.99e-17	7.5	130.39	4.67643	2.07974e-18	3.43092e-16		1.04963
CL21418.Contig3_All	2543	0.37	64.5	6.30609	2.43e-08	5.83e-07	1.05	44.08	5.35094	5.98752e-10	2.29489e-08		0.95515
CL11547.Contig2_All	2306	1.4	115.01	5.73763	7.24e-09	1.97e-07	2.78	61.66	4.89551	1.52911e-09	5.31412e-08		0.842113
CL7368.Contig3_All	2193	10.89	122.34	3.30313	6.78e-06	8.44e-05	23.11	91.36	2.52599	7.43931e-12	4.28898e-10		0.777148
CL21418.Contig10_All	1835	0.37	47.47	5.81488	1.14e-06	1.77e-05	1.17	33.27	5.0387	3.357e-09	1.06812e-07		0.77618
CL4015.Contig6_All	1809	39.79	256.36	2.57928	1.89e-06	2.76e-05	53.43	133.32	1.80819	3.77525e-05	0.000388897		0.771087
CL20060.Contig1_All	1860	35.78	381.16	3.3421	7.89e-08	1.66e-06	49.01	197.68	2.61862	0.0002583	0.00202299		0.723482
CL21364.Contig12_All	1712	24.87	301.36	3.4655	3.65e-20	6.62e-18	51.46	233.44	2.76684	3.25547e-13	2.39997e-11		0.698664
Unigene33768_All	1733	18.5	83.44	2.03899	0.00105399	0.00655156	30.66	60.83	1.53103	0.000871363	0.00566806		0.507962
CL21324.Contig2_All	1629	0	14.75	5.48323	9.52e-05	0.000838339	0	8.08	5.1636	0.000304655	0.0023278		0.319622
CL21009.Contig8_All	1523	0	117.74	8.14925	1.8e-11	8.55e-10	0	65.89	7.87071	1.17633e-10	5.3101e-09		0.278546
CL2491.Contig9_All	1835	0	33.35	6.37194	2.79e-06	3.89e-05	0.35	36.06	6.13284	1.10451e-08	3.08483e-07		0.239107
CL20340.Contig3_All	997	0.93	17.11	3.56647	0.000171767	0.00139401	0.7	7.74	3.33392	0.00339437	0.0177481		0.232549
CL10348.Contig6_All	1706	5.7	33.85	2.37792	2.32e-05	0.000246953	10.01	30.76	2.17646	2.55523e-05	0.000277302		0.201462
CL2491.Contig17_All	1654	21.73	100.2	2.09067	0.000946545	0.00598656	30.83	76.62	1.93509	0.0014705	0.00881251		0.155582
CL20060.Contig2_All	1778	44.56	397.15	3.07051	2.64e-08	6.28e-07	44.05	220.38	2.94432	4.37232e-05	0.000442033		0.126182
CL4015.Contig2_All	1689	88.82	399.79	1.98876	5.19e-05	0.000496392	93.54	237.25	1.87705	7.73898e-07	1.32211e-05		0.111709
CL1409.Contig9_All	1949	45.05	151.44	1.67639	0.00272889	0.0145863	69.53	157.03	1.71452	2.47176e-06	3.63006e-05		-0.0381296
CL21009.Contig7_All	959	13.88	82.97	2.31787	8.81e-06	0.000106156	13.59	52.02	2.38659	2.49098e-05	0.000271223		-0.0687201
CL1509.Contig11_All	1894	51.36	135.92	1.28273	0.00112808	0.00694019	61.08	107.28	1.35471	0.00011317	0.00100091		-0.0719811
CL2187.Contig4_All	1555	5.02	57.61	3.30213	5.13e-05	0.000491624	3.57	26.64	3.41829	4.79646e-06	6.46934e-05		-0.11616
CL11547.Contig5_All	2236	6.73	272.64	4.93147	6.89e-09	1.88e-07	6.15	169.54	5.16182	1.17154e-11	6.48592e-10		-0.230357
CL18748.Contig3_All	1748	0.29	13.56	4.31433	0.000232455	0.00180523	0.38	13.69	4.78903	3.19992e-05	0.000337647		-0.474699
CL1509.Contig7_All	1738	17.99	56.91	1.57218	0.0056216	0.0265058	15.33	47.74	2.13269	3.32609e-05	0.000348791		-0.560515
CL3883.Contig5_All	2412	79.82	219.95	1.2882	0.000816651	0.00528473	66.31	175.08	1.86659	0.000103611	0.000928339		-0.578393
CL1509.Contig12_All	1793	25.14	78.81	1.49346	0.00548946	0.0259846	27.06	82.08	2.1049	1.01265e-06	1.66846e-05		-0.61144
CL4015.Contig7_All	1667	93.72	309.01	1.51762	1.53e-05	0.000171814	50.45	153.76	2.13351	1.49398e-07	3.10463e-06		-0.615887
CL4015.Contig3_All	1752	37.19	144.48	1.78354	2.11e-07	3.98e-06	19.04	70.34	2.40077	4.15724e-08	9.99661e-07		-0.61723
CL21418.Contig25_All	2242	8.85	222.07	4.3975	3.86e-07	6.79e-06	7.55	193.62	5.07518	1.66977e-18	2.78406e-16		-0.677675
CL21418.Contig32_All	2125	8.84	113.49	3.51104	3.59e-05	0.000360519	5.86	96.31	4.56824	2.08478e-16	2.56892e-14		-1.0572
CL12316.Contig4_All	1777	17.87	136.08	2.7194	2.66e-08	6.32e-07	5.21	55.91	3.80148	1.44935e-07	3.01996e-06		-1.08207
CL4015.Contig4_All	1798	4.46	187.88	5.11569	3.18e-17	3.94e-15	1.96	122.53	6.29687	1.07705e-20	2.36678e-18		-1.18118
CL2187.Contig3_All	1660	53.39	203.2	1.65288	0.00319508	0.0166146	19.94	109.47	2.85073	7.86076e-06	9.95089e-05		-1.19785
CL21418.Contig26_All	2285	60.06	227.2	1.89856	0.00594982	0.0278128	27.64	197.35	3.28494	2.02017e-12	1.2925e-10		-1.38638
CL6187.Contig3_All	1624	0.34	64.56	6.41068	9.07e-10	3.02e-08	0	73.38	7.96011	7.28903e-11	3.43891e-09		-1.54943
Unigene6409_All	1841	3.69	41.44	3.16977	2.13e-05	0.000229186	0.82	27.76	5.11142	3.02694e-07	5.75639e-06		-1.94165
Unigene31684_All	1681	17.23	67.9	1.86443	0.000213272	0.00167596	5.59	71.8	4.10878	3.10344e-13	2.30175e-11		-2.24435
Unigene36109_All	1230	2.75	21.87	2.71483	0.000666016	0.00444569	0	14.44	5.83757	2.23872e-05	0.000246877		-3.12274

## Sheet: est
		TSS-VS-TSR					USS-VS-USR						E-J
Unigene	Length	TSS-Expression	TSR-Expression	log2FoldChange(TSR/TSS)	Pvalue	Padj	USS-Expression	USR-Expression	log2FoldChange(USR/USS)	Pvalue	Padj
CL5772.Contig4_All	1214	0	48.97	6.65838	1.17e-06	1.8e-05	1.99	32.39	4.35858	4.25074e-06	5.8233e-05		2.2998
CL21220.Contig4_All	1758	0.96	25.96	4.17575	4.82e-06	6.26e-05	7.2	19.54	1.96424	0.00525746	0.0255411		2.21151
CL14540.Contig21_All	918	0.29	21.77	4.95388	1.22e-05	0.000141532	2.63	14.44	2.85579	0.000359499	0.00268223		2.09808
CL6462.Contig6_All	1333	0	14.26	5.46443	0.000102341	0.000892256	1.9	17.04	3.40173	0.000765137	0.0050822		2.0627
CL1626.Contig2_All	2722	0.34	29.2	5.37796	9.81e-07	1.55e-05	3.1	23.84	3.40556	8.6607e-06	0.000108118		1.9724
CL8558.Contig9_All	1699	1.47	41.2	4.42074	1.85e-06	2.7e-05	8.08	31.58	2.46939	0.00127315	0.00779468		1.95135
CL1504.Contig15_All	1790	20.76	367.92	3.24332	0.00790762	0.0351133	112.12	197.76	1.43112	1.02693e-05	0.00012528		1.81219
CL2664.Contig8_All	2151	0	12.27	5.08731	0.000523577	0.00362019	1.58	13.15	3.35725	0.000385707	0.00284929		1.73006
CL21220.Contig27_All	3920	5.83	92.72	3.43315	2.61e-05	0.000273685	27.11	64.92	1.89299	1.77568e-05	0.000202216		1.54016
CL6881.Contig23_All	2450	2.07	30.8	3.58461	2.37e-05	0.000251799	8.23	23.31	2.06999	0.0014227	0.00856432		1.51462
CL3262.Contig1_All	1384	14.94	104.36	2.63104	1.86e-07	3.55e-06	32.23	59.3	1.43411	0.000774193	0.0051322		1.19694
CL1504.Contig3_All	1709	28.39	248.74	2.76186	2.48e-06	3.5e-05	60.54	121.78	1.59272	7.69761e-07	1.31596e-05		1.16914
CL92.Contig67_All	2058	0	37.11	6.48834	1.74e-06	2.57e-05	0	10.62	5.3873	0.000167594	0.00139939		1.10104
CL3386.Contig1_All	547	1.82	17.35	2.97288	0.00624907	0.0289386	12.93	31.81	1.87302	0.00422671	0.0213128		1.09986
CL20415.Contig5_All	1646	7.04	67.29	3.05499	0.00124923	0.0075591	17.39	49.65	2.129	0.000120832	0.00105895		0.92599
Unigene40381_All	2251	3.04	52.75	3.87244	1.01e-09	3.31e-08	6.85	38.44	2.94831	0.000102288	0.000918259		0.924129
CL19740.Contig11_All	1299	0.68	21.52	4.25023	6.36e-05	0.000592194	0.76	7.38	3.35231	0.00261182	0.0142648		0.897924
CL21397.Contig226_All	4031	4.05	40.51	3.08577	1.19e-05	0.000138625	6.94	22.52	2.21188	0.000384812	0.00284312		0.87389
CL15167.Contig2_All	2857	0	31.15	6.47054	1.04e-06	1.63e-05	0	12.41	5.72461	3.32812e-05	0.000348961		0.74593
CL6462.Contig41_All	1948	2.64	22.24	2.78423	0.000136937	0.00114645	7.2	20.85	2.0385	0.000552329	0.00385528		0.745737
CL403.Contig5_All	1482	287.39	1415.05	2.1601	6.5e-13	4.05e-11	597.49	1138.25	1.56987	3.2485e-05	0.000341951		0.590236
CL9410.Contig2_All	976	0	22.62	5.93218	1.91e-05	0.00020889	0	9.91	5.34928	0.000171139	0.0014241		0.582899
Unigene48157_All	1199	0.64	28	4.4154	0.000250718	0.00192705	1.11	14.6	3.87813	6.37136e-05	0.000611697		0.537266
Unigene8223_All	481	1.39	18.75	3.36944	0.000451683	0.00319267	3.04	16.19	2.87089	0.000158753	0.001337		0.498548
CL20265.Contig14_All	2230	2.86	47.61	3.667	3.07e-07	5.54e-06	4.89	31.7	3.16879	1.95371e-07	3.92257e-06		0.498207
CL9061.Contig3_All	1469	6.03	62.52	3.27003	9.23e-07	1.47e-05	16.92	77.52	2.78096	1.86384e-08	4.90505e-07		0.489068
CL6588.Contig1_All	1973	14.28	68.83	2.19271	0.0014573	0.00861229	18.21	38.9	1.72687	0.00420418	0.0212225		0.465842
Unigene27121_All	3551	4.43	42.95	2.85054	0.00737236	0.033122	8.43	29.92	2.38946	0.000590533	0.0040781		0.461077
Unigene7413_All	763	3.85	48.82	3.46569	1.67e-07	3.23e-06	4.89	29.36	3.03743	2.32083e-06	3.43598e-05		0.428263
CL7620.Contig8_All	1443	18.2	90.22	2.10958	0.00342858	0.0176145	23.7	53.13	1.72316	5.67932e-05	0.000554071		0.386426
CL12449.Contig1_All	942	0	18.11	5.73346	3.61e-05	0.000362589	0	9.25	5.36153	0.000145246	0.00123952		0.371935
Unigene18924_All	1195	0.37	71.12	6.61952	6.33e-11	2.68e-09	0.41	38.89	6.26119	4.01587e-09	1.25562e-07		0.358333
Unigene9000_All	1225	0	38.37	6.74425	2.16e-07	4.06e-06	0	22.64	6.39268	1.67863e-06	2.58787e-05		0.351576
CL9157.Contig3_All	1348	100.87	435.9	1.99425	2.34e-07	4.36e-06	176.81	358.29	1.64379	0.000130912	0.00113349		0.350456
Unigene28528_All	1312	12.16	63.22	2.1708	1.29e-05	0.000147942	20.84	49.98	1.8542	4.9476e-06	6.64339e-05		0.316602
CL403.Contig6_All	1439	329.4	1220.16	1.74983	5.56e-09	1.55e-07	549.75	982.08	1.48865	4.83597e-05	0.000482533		0.261175
CL3838.Contig18_All	1376	23.38	102.76	2.00839	1.33e-07	2.64e-06	29.21	65.01	1.75166	1.64344e-06	2.53979e-05		0.256733
Unigene52358_All	869	0.37	95.13	6.99673	2.47e-12	1.39e-10	0.41	54.62	6.74061	4.95766e-11	2.42233e-09		0.256124
Unigene59177_All	747	81.56	213.1	1.2826	0.000545399	0.0037471	137.01	182.29	1.03196	6.45598e-05	0.000618773		0.250642
Unigene31679_All	1348	0	17.62	5.13202	0.000637097	0.00428196	0	9.97	4.89022	0.00121835	0.00751566		0.2418
CL2541.Contig7_All	1530	0	91.97	7.74773	6.93e-10	2.36e-08	0	54.86	7.5745	1.76707e-09	6.04188e-08		0.173231
CL9157.Contig1_All	1351	332.81	898.04	1.29838	0.000400855	0.00288408	480.3	682.29	1.13418	0.00582726	0.0277769		0.164196
CL5772.Contig2_All	1132	4.65	89.13	3.84989	3.11e-05	0.000318651	6.5	59.53	3.70177	1.09166e-07	2.3489e-06		0.14812
CL21220.Contig28_All	1646	38.52	106.33	1.2462	0.00870105	0.0379377	60.29	88.07	1.10976	0.00299568	0.0160028		0.136439
CL9157.Contig5_All	1339	94.4	241.77	1.26572	0.000482105	0.00337524	159.05	232.31	1.14447	0.0109267	0.046549		0.12125
CL9061.Contig2_All	1328	28.8	92.58	1.637	0.000322694	0.00239607	63.12	120.34	1.52652	5.79024e-05	0.000563769		0.110478
CL5834.Contig3_All	765	0	8.46	4.72194	0.00141179	0.00838682	0	5.68	4.61249	0.00193763	0.0111168		0.109453
CL12825.Contig4_All	1544	7.55	28.25	1.66879	0.0085163	0.0373018	10.36	21.03	1.59226	0.00390443	0.0199472		0.0765337
CL181.Contig20_All	2069	10.7	51.7	2.11573	8.06e-06	9.82e-05	14.93	43.54	2.04704	0.000869295	0.00565761		0.068693
CL21220.Contig53_All	5948	26.01	74.49	1.36675	0.000654661	0.00438317	43.8	73.03	1.29973	0.000157684	0.00132944		0.0670163
CL20994.Contig1_All	4029	0	9.32	4.41601	0.00435283	0.0214538	0	6.74	4.35304	0.00489736	0.0240645		0.0629744
Unigene17336_All	2910	0	50.53	7.05056	4.19e-08	9.46e-07	0	34.39	6.99479	5.04092e-08	1.18343e-06		0.0557676
CL92.Contig60_All	2181	1.7	90.64	5.31717	1.36e-11	6.61e-10	3.83	116.22	5.29589	4.51351e-17	6.17912e-15		0.0212772
Unigene47980_All	566	0	7.36	4.5831	0.00209321	0.0116611	0	5.26	4.56717	0.00219822	0.0123725		0.0159295
CL9157.Contig2_All	1426	112.29	344.35	1.45578	0.000273131	0.00207295	141.71	252.2	1.45333	0.00213833	0.0120846		0.00244844
CL20508.Contig6_All	3394	0	18.78	5.61311	7.15e-05	0.000655757	0	13.6	5.61613	7.94696e-05	0.000737999		-0.00301951
CL7620.Contig11_All	1436	12.61	125.58	3.16297	9.11e-07	1.45e-05	14.94	95.7	3.18291	3.45728e-09	1.09718e-07		-0.0199432
Unigene9052_All	1225	1.77	26.81	3.12245	0.00333361	0.0171954	5.27	34.92	3.19198	1.15511e-07	2.46777e-06		-0.0695361
Unigene21319_All	1342	0	14	5.43968	0.000110441	0.000952311	0	12.3	5.56218	7.74091e-05	0.000721326		-0.12249
CL9390.Contig4_All	1271	93.15	251.73	1.29449	0.000233118	0.00180963	152.73	278	1.46097	0.000496957	0.00352608		-0.166482
CL13038.Contig2_All	1426	60	213.2	1.7152	8.72e-07	1.4e-05	58.55	143.43	1.88299	2.88009e-07	5.51567e-06		-0.167788
Unigene5829_All	803	17.56	51.6	1.42857	0.000664914	0.00443938	22.6	45.83	1.62514	0.00201894	0.0115097		-0.196571
CL9390.Contig3_All	1282	97.62	276.34	1.40394	9.32e-05	0.000823042	142.54	284.92	1.60403	0.000315739	0.00240014		-0.200091
CL9390.Contig1_All	1253	90.36	239.86	1.30598	0.00112368	0.00691665	142.5	267.24	1.51113	0.000449857	0.00324317		-0.205146
Unigene51639_All	880	0.34	18.15	4.66825	9.59e-05	0.000843916	0.41	16.16	4.91297	6.9926e-05	0.000662144		-0.244726
CL7778.Contig4_All	2288	18.92	243.72	3.50338	1.44e-16	1.63e-14	18	181.48	3.90417	4.65167e-30	2.6936e-27		-0.400791
CL4035.Contig10_All	1525	83.46	1592.01	4.15073	3.01e-24	8.8e-22	85.6	1353.46	4.55636	1.57565e-15	1.718e-13		-0.405629
CL3691.Contig2_All	1419	2.86	22.03	2.78466	0.00141651	0.00841192	4.25	28.23	3.20341	1.65931e-05	0.000190596		-0.418757
CL7620.Contig13_All	1451	37.89	147.79	1.78276	0.00223104	0.0123053	39.24	126.41	2.284	3.48438e-06	4.90095e-05		-0.501235
CL20263.Contig3_All	1559	143.16	675.94	2.14325	3.11e-12	1.72e-10	136.51	554.03	2.64553	1.37164e-06	2.17264e-05		-0.502278
CL5709.Contig9_All	2487	7.39	92.56	3.48793	9.05e-06	0.000108657	6.09	71.52	4.03036	4.25722e-09	1.32335e-07		-0.542422
CL4035.Contig6_All	1564	339.37	920.25	1.32466	4.57e-06	5.97e-05	315.83	762.23	1.93549	8.5654e-05	0.000787791		-0.610836
CL3838.Contig15_All	1359	1.02	83.84	5.8166	1.53e-12	8.91e-11	0.7	65.8	6.43082	1.63363e-13	1.27392e-11		-0.614218
CL4035.Contig3_All	1536	498.15	1267.4	1.25404	1.29e-05	0.000148165	498.42	1145.75	1.87266	6.2887e-05	0.000605254		-0.61862
Unigene19250_All	1687	10.81	205.76	3.96853	3.65e-10	1.32e-08	11.61	200.56	4.6111	4.63749e-26	1.88359e-23		-0.642566
CL5857.Contig2_All	1550	59.64	135.64	1.11362	0.0034291	0.0176167	57.45	126.81	1.77687	0.000266754	0.00207828		-0.663256
Unigene29773_All	884	0	23.87	6.1173	6.28e-06	7.91e-05	0	28.24	6.79932	1.53556e-07	3.1768e-06		-0.682018
CL4035.Contig16_All	1521	138.17	477.31	1.65332	2.16e-05	0.000232525	122.67	390.26	2.3388	3.42264e-06	4.82479e-05		-0.685488
CL12179.Contig5_All	1518	0.98	38.22	4.70998	1.02e-07	2.09e-06	0	12.02	5.53949	9.80603e-05	0.000885818		-0.82951
CL4035.Contig13_All	1547	3.6	409.77	6.52246	1.03e-38	1.15e-35	2.75	363.36	7.36953	1.72721e-24	5.92094e-22		-0.847071
CL92.Contig53_All	2162	0	9.66	4.43786	0.00416014	0.0206582	0	14.7	5.30384	0.000337286	0.00254139		-0.865983
Unigene16949_All	2524	0.59	12.47	3.50009	0.00165714	0.00959157	0.79	16.2	4.40283	2.16328e-05	0.000239762		-0.902743
Unigene51629_All	1036	0	6.48	4.01858	0.0108969	0.045525	0	8.71	5.08527	0.000518085	0.00365135		-1.06668
CL7620.Contig14_All	1450	7.66	66.25	2.98011	3.13e-05	0.000320337	6.56	74.82	4.04831	8.13257e-12	4.65577e-10		-1.06819
Unigene25945_All	1181	28.72	82.75	1.39227	0.00507292	0.0243504	24.12	88.55	2.46889	2.17812e-10	9.27999e-09		-1.07663
Unigene5363_All	1362	9.41	30.48	1.62986	0.00658615	0.030201	4.24	19.28	2.70767	0.0006425	0.00438451		-1.07781
CL244.Contig18_All	1566	0	10.94	4.58447	0.00289983	0.0153272	0	14.01	5.73366	4.69658e-05	0.000470679		-1.14918
Unigene25476_All	842	0	5.17	4.13311	0.00714311	0.0322581	0	9.33	5.29293	0.000202772	0.00164655		-1.15983
Unigene59585_All	628	0.37	29.55	5.4276	5.68e-07	9.56e-06	0	24.4	6.60728	4.80562e-07	8.6805e-06		-1.17967
CL4520.Contig4_All	1828	137.58	758.71	2.33223	0.0076786	0.0342675	35.29	378.06	3.71731	2.26827e-07	4.46778e-06		-1.38508
Unigene51640_All	898	0.74	26.96	4.5797	3.56e-05	0.000358268	0	15.94	5.96935	1.49455e-05	0.00017417		-1.38965
Unigene6354_All	572	0.37	10.48	3.96498	0.00122504	0.00743752	0	10.97	5.51837	8.12625e-05	0.000752488		-1.55339
Unigene33083_All	1079	0.64	164.53	7.19767	8.06e-18	1.07e-15	0	132.63	8.75953	8.21815e-14	6.7852e-12		-1.56186
Unigene55675_All	1669	29.07	131.73	2.14764	0.00511229	0.0245089	9.22	91.46	3.78456	7.85504e-07	1.3394e-05		-1.63692
CL18882.Contig18_All	1385	3.14	26.4	2.83208	0.000342538	0.00252212	0	15.14	5.99643	9.74761e-06	0.000119862		-3.16435
CL15584.Contig1_All	1437	7.5	39.3	2.22307	7.54e-05	0.000685637	0.76	40.62	5.73283	3.73447e-10	1.50363e-08		-3.50976

## Sheet: ABC
		TSS-VS-TSR					USS-VS-USR						E-J
Unigene	Length	TSS-Expression	TSR-Expression	log2FoldChange(TSR/TSS)	Pvalue	Padj	USS-Expression	USR-Expression	log2FoldChange(USR/USS)	Pvalue	Padj
Unigene24544_All	2055	0	25.34	6.14491	5.59e-06	7.15e-05	1.49	11.43	3.1496	0.00128892	0.00787382		2.9953
CL10265.Contig15_All	1194	1.05	25.88	4.19212	7.32e-06	9.03e-05	9.92	18.43	1.46807	0.011145	0.0473006		2.72405
CL10265.Contig9_All	2643	0	25.4	6.22354	3.42e-06	4.64e-05	2.34	22.79	3.65141	6.85708e-06	8.82768e-05		2.57213
CL21220.Contig27_All	3920	5.83	92.72	3.43315	2.61e-05	0.000273685	27.11	64.92	1.89299	1.77568e-05	0.000202216		1.54016
Unigene27801_All	1443	1	112.64	6.25649	8.01e-16	8.04e-14	3.01	75.41	5.03367	1.21537e-13	9.72084e-12		1.22283
CL10624.Contig5_All	3256	2.7	37.73	3.46286	5.17e-06	6.67e-05	8.69	30.07	2.26323	0.000115088	0.00101509		1.19963
CL10265.Contig3_All	3249	2.39	21.81	2.94156	0.000188397	0.00150856	6.59	19.43	2.12077	0.000926277	0.00596258		0.820783
Unigene35479_All	4703	41.38	380.11	3.0755	4.81e-21	9.77e-19	71.05	242.24	2.35298	1.11631e-17	1.6638e-15		0.722526
Unigene15188_All	3616	46.71	163.68	1.64575	4.05e-06	5.37e-05	127.61	169.16	1.0065	5.91896e-05	0.000574748		0.639245
CL582.Contig6_All	2648	8.32	34.17	1.84404	0.00657507	0.0301644	22.77	35.53	1.24995	0.00881344	0.0390609		0.594086
Unigene21973_All	1394	3.1	34.61	3.26126	1.54e-06	2.31e-05	5.77	28.57	2.85223	9.06917e-07	1.51302e-05		0.409027
CL10265.Contig6_All	2838	9.08	63.44	2.7143	1.19e-06	1.84e-05	14.49	49.53	2.32328	2.63429e-05	0.000284908		0.391026
CL2880.Contig6_All	2385	7.33	31.96	2.03186	0.00116477	0.00713161	19	38.46	1.6493	0.00314151	0.0166454		0.382562
Unigene24722_All	1378	1.34	374.34	7.60809	1.36e-28	6.2e-26	1.87	238.22	7.2403	2.83162e-26	1.18089e-23		0.367782
Unigene22534_All	1678	0	112.95	8.01872	6.88e-11	2.89e-09	0	58.36	7.65878	8.87911e-10	3.2842e-08		0.359936
Unigene28158_All	1138	7.85	29.46	1.67177	0.0118679	0.0487904	9.19	17.55	1.5087	0.00870882	0.0386762		0.163068
CL21220.Contig53_All	5948	26.01	74.49	1.36675	0.000654661	0.00438317	43.8	73.03	1.29973	0.000157684	0.00132944		0.0670163
CL5608.Contig4_All	2674	0	59.24	7.30368	7.01e-09	1.91e-07	0	41.24	7.24645	9.77423e-09	2.77279e-07		0.0572273
CL10069.Contig4_All	2995	84.73	190.89	1.06277	9.9e-05	0.000867168	92.65	138.57	1.12593	0.0006052	0.00416446		-0.0631525
CL21220.Contig36_All	5207	10.51	54.03	2.25811	0.000111888	0.000963026	10.89	37.54	2.32692	6.75966e-05	0.000643395		-0.0688122
Unigene61686_All	1025	0	6.19	4.3654	0.0039461	0.0197859	0	5.01	4.48472	0.00276542	0.0149521		-0.119318
CL5608.Contig2_All	2629	0.88	187.16	6.94827	5.29e-20	9.37e-18	1.23	148.53	7.17785	1.38507e-21	3.45063e-19		-0.229574
CL3484.Contig2_All	2569	294.37	795.84	1.36924	0.000173337	0.0014048	230.05	483.73	1.6368	1.90504e-10	8.21454e-09		-0.26756
CL16515.Contig2_All	3342	0	28.75	6.33466	2.11e-06	3.04e-05	0	26.96	6.74263	1.96384e-07	3.94153e-06		-0.407966
CL14794.Contig9_All	3381	22.01	98.49	2.01798	2.24e-06	3.2e-05	13.49	50.61	2.43596	0.00127468	0.00780268		-0.417975
CL3484.Contig3_All	2313	586.69	1794.55	1.51657	0.000141206	0.00117677	482.7	1234.56	1.95016	2.70983e-21	6.52346e-19		-0.433592
CL14794.Contig6_All	1309	36.82	178.17	2.09305	5.81e-07	9.75e-06	22.39	97.84	2.7335	5.03506e-06	6.74444e-05		-0.640456
Unigene22772_All	804	0.34	60.66	6.27768	4.22e-09	1.21e-07	0	33.02	6.942	8.9486e-08	1.97097e-06		-0.66432
Unigene51451_All	2567	12.22	98.32	2.90195	3.04e-07	5.49e-06	7.81	68.22	3.58995	6.83471e-09	2.01667e-07		-0.688003
CL9242.Contig5_All	4974	3.38	18.6	2.22207	0.00240058	0.013092	2.25	14.82	3.00844	0.00113222	0.00706256		-0.78637
Unigene21813_All	1975	0	6.75	3.99093	0.0115084	0.0475669	0	7.57	4.85676	0.00109514	0.00686119		-0.865832
Unigene51448_All	894	1.03	20.25	3.82543	5.39e-05	0.000512937	0.41	13.84	4.8686	1.83507e-05	0.000208081		-1.04317
Unigene51450_All	2521	32.26	143.84	2.10801	4.82e-05	0.000465775	17.96	127.31	3.29518	3.88749e-08	9.414e-07		-1.18717
CL21332.Contig7_All	1362	3.18	25.11	2.80888	0.000231703	0.00179988	1.52	19.86	4.00188	4.0296e-06	5.5597e-05		-1.193
CL21332.Contig16_All	1181	1.4	12.2	2.79174	0.00431251	0.0212867	0.35	12.98	4.70103	5.33301e-05	0.000524976		-1.90929

## Sheet: per
		TSS-VS-TSR					USS-VS-USR						E-J
Unigene	Length	TSS-Expression	TSR-Expression	log2FoldChange(TSR/TSS)	Pvalue	Padj	USS-Expression	USR-Expression	log2FoldChange(USR/USS)	Pvalue	Padj
Unigene11207_All	817	0	22.96	6.02403	1.03e-05	0.000121757	1.23	8.52	3.09142	0.006322	0.0297587		2.9326
CL1417.Contig6_All	1680	11.04	916.26	5.96348	4.42e-21	9.04e-19	29.41	266.38	3.77662	2.65772e-07	5.13688e-06		2.18685
CL3131.Contig17_All	1368	2.14	48.96	4.20431	3.43e-06	4.65e-05	18.06	50.54	2.07455	0.00788949	0.0356707		2.12976
CL8838.Contig2_All	1436	0	10.37	5.06172	0.000455443	0.00321483	0.76	6.15	3.10214	0.00641487	0.0301313		1.95958
CL1076.Contig3_All	1715	0	44.08	6.84179	1.76e-07	3.38e-06	1.64	38	4.91709	3.84534e-09	1.20626e-07		1.9247
CL7095.Contig3_All	549	0.59	29.93	4.72498	4.01e-06	5.32e-05	5.18	32.75	3.06172	0.000151592	0.00128527		1.66325
Unigene36658_All	1381	0	7.52	4.56324	0.00238834	0.0130367	1.9	12.64	2.93774	0.00947757	0.0415052		1.6255
Unigene21674_All	1834	0	164.84	8.44126	3.53e-12	1.92e-10	1.14	122.09	6.8842	8.37229e-19	1.45246e-16		1.55705
CL20825.Contig4_All	2138	2.35	120.44	5.35079	3.24e-18	4.53e-16	8.66	87.68	3.85344	3.66301e-14	3.21808e-12		1.49735
Unigene22563_All	1200	0.71	56.4	5.66604	4.89e-09	1.38e-07	3.89	53.86	4.2882	1.2265e-13	9.79151e-12		1.37783
CL8033.Contig8_All	1195	0.71	16.87	3.97561	0.000171942	0.0013951	3.51	15.22	2.64103	0.000808013	0.00532059		1.33457
Unigene13953_All	1816	4.49	104.63	4.21957	2.03e-14	1.65e-12	13.85	70.35	2.92748	5.58973e-13	3.94439e-11		1.2921
CL3131.Contig12_All	1493	0.37	194.46	7.90207	8.81e-16	8.81e-14	0.73	78.76	6.68846	4.55053e-15	4.5639e-13		1.21361
CL20265.Contig5_All	2225	0	25.31	6.21094	3.79e-06	5.07e-05	0.7	24.06	5.0036	1.52375e-07	3.15801e-06		1.20734
CL15167.Contig94_All	2547	2.27	27.17	3.18015	0.0002112	0.00166137	9.25	26.95	2.13201	0.000123732	0.00108064		1.04814
Unigene22657_All	2325	3.03	48.86	3.7461	3.54e-08	8.16e-07	8.02	35.48	2.70364	6.47492e-07	1.12901e-05		1.04246
CL21201.Contig16_All	1075	0.74	30.2	4.8415	7.7e-07	1.25e-05	1.75	24.14	3.82161	4.83007e-05	0.000482162		1.01989
CL6134.Contig5_All	1329	0	11.48	5.20384	0.000267253	0.00203387	0.41	8.61	4.19896	0.000495559	0.00351882		1.00488
CL3131.Contig11_All	1539	0	18.14	5.12024	0.000629138	0.00423484	0	4.08	4.17594	0.00639795	0.0300666		0.944293
Unigene25643_All	1945	0	22.61	5.96637	1.55e-05	0.00017369	0	7.87	5.11759	0.000388741	0.00286832		0.848784
CL7236.Contig3_All	1190	0	10.35	5.02906	0.000528238	0.00364825	0	6.08	4.24448	0.00633701	0.0298195		0.784581
CL12367.Contig1_All	1598	0	8.08	4.68216	0.00157842	0.00921366	0.38	7.14	3.89982	0.00156788	0.00930209		0.782337
CL16121.Contig2_All	704	2.16	17.4	2.81893	0.00119522	0.00728594	7.23	20.95	2.06387	0.000909371	0.00587361		0.755057
Unigene36707_All	1280	2.42	67.5	4.55438	1.2e-11	5.93e-10	3.86	39.01	3.81412	6.46121e-08	1.47524e-06		0.740258
CL18244.Contig4_All	2538	1.4	50.98	4.8281	4.85e-10	1.7e-08	2.31	30.26	4.1236	5.49655e-09	1.66159e-07		0.704498
Unigene5974_All	752	2.3	29.12	3.34272	4e-06	5.31e-05	3.68	18.31	2.68593	0.000257642	0.00201876		0.656789
CL19393.Contig2_All	1168	35.03	242.1	2.72583	1.2e-11	5.9e-10	81.29	223.39	2.07709	4.35041e-12	2.61455e-10		0.648739
CL3131.Contig10_All	1497	0	196.27	8.59972	1.35e-12	7.94e-11	0	77.57	7.95119	1.09926e-10	4.9991e-09		0.648528
CL17280.Contig3_All	871	5.72	70.54	3.48232	6.44e-07	1.07e-05	1.99	11.08	2.86157	0.0084589	0.0377544		0.620754
CL8232.Contig2_All	1768	0.71	15.59	3.87355	0.000387544	0.00280137	2.34	16.57	3.26078	0.000268774	0.00209278		0.612768
Unigene10491_All	1375	0	37.09	6.68612	3.06e-07	5.53e-06	0	17.5	6.08178	8.29548e-06	0.00010425		0.604346
Unigene6564_All	1654	0.29	158.63	7.65806	4.06e-15	3.67e-13	0.76	106.09	7.06759	1.51884e-15	1.65816e-13		0.59047
CL16812.Contig105_All	1258	1.42	17.07	3.29066	0.000246619	0.00189973	4.56	22.18	2.78112	9.39287e-06	0.000116033		0.509536
CL3401.Contig4_All	1075	36.93	880.31	4.41384	2.62e-45	4.2e-42	74.39	747.86	3.90779	4.8785e-57	1.37079e-53		0.506046
CL20825.Contig3_All	1487	7.68	186.2	4.39436	5.63e-25	1.76e-22	15.25	153.94	3.89862	6.90324e-23	1.97534e-20		0.495736
CL20627.Contig4_All	1105	2.3	23.29	3.02389	4.21e-05	0.000414475	4.33	17.04	2.53559	0.00123842	0.00762017		0.488298
Unigene27121_All	3551	4.43	42.95	2.85054	0.00737236	0.033122	8.43	29.92	2.38946	0.000590533	0.0040781		0.461077
Unigene21260_All	4148	0	24.23	5.4317	0.0002384	0.00184456	0	12.65	4.98885	0.000927366	0.00596825		0.442851
Unigene27628_All	3792	0	110.8	7.87287	3.78e-10	1.36e-08	0	60.31	7.60185	1.42045e-09	4.98094e-08		0.271024
Unigene34525_All	2526	3.81	90.37	4.37579	7.29e-13	4.5e-11	5.45	65.51	4.1261	4.50651e-14	3.8972e-12		0.249689
CL1384.Contig8_All	1003	50.2	371.05	2.76685	4.8e-22	1.1e-19	73.57	281.14	2.52158	4.22252e-24	1.37857e-21		0.245274
CL10183.Contig8_All	1052	1.47	17.36	3.19941	0.00347656	0.0178072	1.11	8.83	2.99252	0.00820236	0.0368201		0.206894
Unigene26400_All	928	4.56	35.98	2.7744	0.000227782	0.00177462	4.95	21.2	2.57349	5.56624e-05	0.000544495		0.20091
Unigene24598_All	1592	8.36	56.68	2.63962	3.99e-06	5.31e-05	8.54	34.83	2.44895	0.000159605	0.00134292		0.190673
CL477.Contig15_All	1833	0.29	14.88	4.42426	0.000167644	0.00136538	0.7	15.47	4.3126	3.52339e-05	0.000366498		0.111668
CL318.Contig11_All	1074	6.19	30.19	2.11613	0.00145355	0.00859562	17.77	49.73	2.00761	0.000438618	0.00317703		0.10852
Unigene61658_All	805	0	5.63	4.18925	0.00622764	0.0288544	0	3.94	4.11438	0.0077453	0.0351476		0.0748793
CL6563.Contig2_All	1084	1.57	1106.85	8.87297	1.3e-44	1.96e-41	3.83	1290.69	8.80184	4.11998e-70	1.96159e-66		0.0711283
CL13869.Contig1_All	891	3.13	109.17	3.76683	0.0102711	0.0434473	7.17	69.84	3.69866	1.00755e-05	0.000123381		0.068164
CL18989.Contig7_All	783	0	16.11	5.57532	6.87e-05	0.000633116	0	10.41	5.51177	8.26743e-05	0.000763911		0.0635572
Unigene8747_All	651	0.34	8.66	3.6648	0.00403969	0.0201646	0.73	8.98	3.60997	0.000779862	0.00516339		0.0548304
CL3476.Contig80_All	2789	1.47	72.32	5.30432	9.53e-11	3.89e-09	1.52	49.46	5.2647	1.28132e-10	5.73872e-09		0.0396183
CL8066.Contig7_All	991	0	17.22	5.67592	4.38e-05	0.000428284	0	11.44	5.63828	4.71547e-05	0.000472352		0.0376388
Unigene17433_All	1246	2	31.8	3.52848	0.000330001	0.00244199	1.17	11.46	3.52542	0.000380314	0.00281486		0.00305313
CL3476.Contig41_All	2569	0	58.73	7.26131	1.14e-08	2.97e-07	0	44.71	7.27043	1.1305e-08	3.1492e-07		-0.00911929
Unigene26141_All	905	2.2	18.84	2.6291	0.00240319	0.0131028	3.04	13.96	2.6627	0.00099724	0.00634527		-0.0336017
Unigene8091_All	914	0	53.96	7.15515	1.94e-08	4.76e-07	0	38.19	7.19901	1.24168e-08	3.42494e-07		-0.0438609
CL15775.Contig1_All	1416	7.27	295.65	4.18107	0.00246926	0.0134127	6.7	148.55	4.23667	0.00073017	0.0048831		-0.0555975
CL21248.Contig1_All	1038	1.03	55.02	5.19043	1.77e-08	4.41e-07	0.76	29.47	5.27583	7.85232e-08	1.75499e-06		-0.0853996
CL20762.Contig13_All	1082	0	10.15	4.99272	0.000583092	0.0039688	0	7.9	5.08706	0.000444362	0.00321017		-0.0943446
Unigene9415_All	1667	0	9.04	4.74184	0.00143509	0.0085068	0	6.96	4.84734	0.000961398	0.00615147		-0.1055
Unigene31414_All	1939	0	24.86	6.15423	5.5e-06	7.04e-05	0	19.04	6.27619	2.68849e-06	3.9075e-05		-0.121957
CL15775.Contig4_All	1544	7.58	385.87	4.58519	0.000484753	0.00339097	5.77	187.01	4.71031	0.000215705	0.00173717		-0.125117
CL3508.Contig2_All	1467	0.68	19.85	4.11498	0.000316116	0.0023534	1.52	26.35	4.24029	4.93648e-05	0.00049079		-0.125309
CL15775.Contig2_All	1469	23.22	690.61	3.95413	0.0027039	0.01447	19.66	345.44	4.08324	0.000719956	0.0048234		-0.129105
CL14208.Contig3_All	950	1.05	13.22	3.21525	0.00198893	0.0111644	1.08	10.64	3.35478	0.000884214	0.00573511		-0.13953
Unigene10782_All	1130	0	7.01	4.53621	0.00237157	0.0129571	0	5.52	4.68322	0.00152109	0.00906561		-0.147015
Unigene24897_All	1767	0	51.24	7.10326	2.66e-08	6.32e-07	0	41.98	7.29236	7.96559e-09	2.30862e-07		-0.189107
CL18514.Contig8_All	2844	0	40.27	6.6988	3.96e-07	6.95e-06	0	32.69	6.89565	9.77541e-08	2.12819e-06		-0.196855
CL21286.Contig37_All	1061	0.29	26.47	5.23638	1.87e-06	2.73e-05	0.76	34.68	5.45586	1.12138e-08	3.12634e-07		-0.219486
CL6388.Contig4_All	1169	4.28	41.6	3.15286	1.34e-05	0.000153151	4.59	35.75	3.42518	4.14117e-08	9.96217e-07		-0.27232
CL3042.Contig6_All	915	0	14.7	5.50115	8.68e-05	0.000774548	0	13.09	5.78234	2.5933e-05	0.000281043		-0.281188
CL1076.Contig7_All	1658	25.86	143.7	2.30483	3.63e-09	1.06e-07	22.84	93.61	2.65332	6.57832e-09	1.95211e-07		-0.34849
CL20972.Contig22_All	1146	0	14.21	5.18759	0.000413516	0.00296037	0	10.87	5.55301	6.80295e-05	0.000646973		-0.365425
CL16656.Contig2_All	1564	0	6	4.14831	0.00726001	0.0326926	0	5.21	4.5329	0.00249537	0.013736		-0.384588
CL15059.Contig2_All	1214	0	9.43	4.92337	0.000720151	0.00474974	0	9.38	5.33073	0.000166768	0.00139396		-0.407354
CL992.Contig4_All	1233	0	235.8	8.98084	2.69e-14	2.12e-12	0	226.71	9.39593	2.62089e-16	3.18599e-14		-0.415084
CL3476.Contig27_All	3664	0	23.09	5.95953	1.65e-05	0.000183884	0	24.69	6.41644	2.46627e-06	3.62294e-05		-0.456913
Unigene17218_All	2223	9.59	58.5	2.44273	0.00320432	0.0166531	5.12	31.02	2.91038	0.00135551	0.00822925		-0.467658
CL19386.Contig17_All	816	0	7.74	4.62675	0.0018575	0.0105488	0	7.72	5.11724	0.000360193	0.00268595		-0.490497
CL3476.Contig79_All	3342	0	19.96	5.69373	5.39e-05	0.000513333	0	23.68	6.21092	7.34496e-06	9.38139e-05		-0.517187
CL6134.Contig10_All	1126	0	13.9	5.44107	0.00011094	0.000956079	0	15.4	6.00291	9.90904e-06	0.000121673		-0.561837
CL15264.Contig5_All	1370	2.71	18.43	2.45436	0.00755535	0.0338171	3.16	19.03	3.05829	6.59174e-05	0.00062933		-0.603927
Unigene26009_All	2469	4.33	43.85	3.06626	1.84e-06	2.7e-05	4.03	39.91	3.69755	8.64645e-09	2.48452e-07		-0.631287
CL16121.Contig3_All	987	2.04	21.26	2.82809	0.0114522	0.0473889	1.52	14.57	3.55815	3.95989e-05	0.000405068		-0.730058
CL20265.Contig11_All	2211	0	44.33	6.85075	1.69e-07	3.27e-06	0	52.62	7.59795	8.96694e-10	3.31311e-08		-0.747202
CL21243.Contig2_All	2332	9.06	69.88	2.83922	2.86e-08	6.74e-07	6.85	59.59	3.64983	3.65575e-13	2.66867e-11		-0.810612
CL21332.Contig35_All	2021	30.35	245.74	2.91516	2.48e-05	0.000262097	19.54	205.09	3.73207	1.32923e-06	2.11464e-05		-0.816912
CL21409.Contig6_All	1252	11.14	58.11	2.28387	0.000165646	0.0013508	8.11	48.33	3.1277	2.10398e-10	8.98871e-09		-0.843837
Unigene12346_All	2580	0	28.16	5.59249	0.000140346	0.00117052	0	22.22	6.44624	1.07764e-06	1.76027e-05		-0.853753
Unigene52332_All	859	0	7.19	4.49312	0.0029206	0.0154178	0	9.7	5.35447	0.000171262	0.00142498		-0.861353
Unigene20007_All	1999	0.37	113.22	7.20864	4.88e-13	3.1e-11	0	76.88	8.08431	2.26651e-11	1.17937e-09		-0.875671
Unigene18257_All	1583	2.35	119.24	5.33863	4.95e-18	6.75e-16	1.55	95.37	6.21863	2.33616e-18	3.81936e-16		-0.880006
CL3042.Contig8_All	898	0	8.91	4.80941	0.00112089	0.00690198	0	12.01	5.70266	3.63835e-05	0.000376605		-0.893255
CL1527.Contig15_All	1028	0.74	9.66	3.1995	0.00746087	0.0334569	0.35	9.24	4.09604	0.00169576	0.00992951		-0.896542
Unigene4573_All	4888	0.37	9.22	3.67601	0.00596309	0.0278579	0.73	18.01	4.5992	2.41017e-06	3.54934e-05		-0.923189
Unigene35985_All	1290	0.29	74	6.65732	4.99e-11	2.16e-09	0	52.61	7.58569	1.10506e-09	3.98505e-08		-0.928367
CL19784.Contig23_All	855	0.64	36.9	5.09214	1.36e-07	2.69e-06	0.38	33.33	6.05965	1.07473e-08	3.01341e-07		-0.967504
CL12585.Contig2_All	1497	5.86	84.94	3.71122	3.36e-12	1.84e-10	5.07	104.55	4.80806	1.54137e-09	5.3513e-08		-1.09685
Unigene34493_All	1545	10.12	68.24	2.59141	2.29e-07	4.28e-06	4.93	48.24	3.73625	6.9077e-05	0.000655625		-1.14484
CL4148.Contig4_All	1480	0.37	141.03	7.49828	3.55e-14	2.75e-12	0	121.1	8.65836	2.10533e-13	1.61747e-11		-1.16007
Unigene20003_All	901	104.88	573.65	2.25936	3.47e-06	4.7e-05	58.92	469.71	3.43588	6.92671e-10	2.61971e-08		-1.17651
CL946.Contig12_All	1897	0.68	52.07	5.57582	1.55e-09	4.9e-08	0.41	56.17	6.77932	1.46124e-11	7.89845e-10		-1.2035
Unigene21226_All	1589	0.64	26.44	4.62163	2.69e-06	3.76e-05	0	15.08	5.9131	1.54121e-05	0.000178926		-1.29147
CL1786.Contig1_All	710	1.73	22.06	3.31845	0.000214773	0.00168589	0.35	12.84	4.6115	0.000187602	0.00153971		-1.29306
Unigene33256_All	1533	44.33	195.66	2.02464	4.77e-08	1.06e-06	13.68	146.72	3.7235	1.08036e-06	1.76425e-05		-1.69886
Unigene17395_All	3984	5.92	102.34	3.64096	0.000234685	0.0018198	8.25	268.49	5.4139	9.84185e-27	4.2924e-24		-1.77294
CL10970.Contig1_All	1385	2.89	33.88	3.11688	0.000468842	0.00329651	0.76	28.35	5.2608	3.32221e-08	8.21455e-07		-2.14392
CL21409.Contig15_All	847	1.73	15.34	2.8287	0.00239452	0.013064	0	12.59	5.62621	5.73288e-05	0.000558846		-2.79751
CL18514.Contig18_All	2667	4.42	85.19	4.00853	1.6e-05	0.000178758	0	42.88	7.21714	1.78453e-08	4.71951e-07		-3.20862
Unigene34818_All	2578	16.42	123.42	2.76003	3.08e-05	0.000315954	1.4	123.84	6.56216	1.81567e-20	3.89498e-18		-3.80213

## Sheet: mon
		TSS-VS-TSR					USS-VS-USR						E-J
Unigene	Length	TSS-Expression	TSR-Expression	log2FoldChange(TSR/TSS)	Pvalue	Padj	USS-Expression	USR-Expression	log2FoldChange(USR/USS)	Pvalue	Padj
CL19928.Contig14_All	1951	0	83.1	7.61921	1.25e-09	4.05e-08	5.57	80.96	4.40313	1.1761e-14	1.10851e-12		3.21608
CL2417.Contig11_All	2465	0	37.01	6.70307	2.66e-07	4.89e-06	2.75	24.03	3.57995	3.34113e-06	4.72389e-05		3.12312
CL20016.Contig13_All	2456	0	13.96	5.4398	0.000110939	0.000956079	0.35	7.05	3.62088	0.00621	0.0293209		1.81892
CL8305.Contig1_All	1691	3.7	111.25	4.34887	1.36e-09	4.35e-08	27.14	116.02	2.6815	2.46643e-09	8.14549e-08		1.66737
CL4070.Contig3_All	1972	1.47	33.72	3.72532	8.28e-05	0.000743295	7.5	23.37	2.16999	0.00612628	0.0289839		1.55533
CL458.Contig3_All	1467	1.47	35.68	4.07484	0.00016171	0.00132364	8.29	32.27	2.52491	0.00357814	0.0185511		1.54993
CL2133.Contig1_All	1784	0.34	51.68	6.12929	9.01e-09	2.4e-07	0.79	20.52	4.61447	3.97576e-05	0.000406498		1.51482
CL1644.Contig15_All	1761	15.41	157.22	3.14761	2.22e-10	8.41e-09	43.07	115.03	1.95078	5.58825e-08	1.297e-06		1.19683
CL4070.Contig2_All	2031	14.18	148.65	3.09524	1.4e-07	2.75e-06	28.62	74.25	1.95641	2.38966e-08	6.1243e-07		1.13883
Unigene41000_All	998	1.37	25.03	3.72682	5.81e-05	0.000547295	3.54	17.14	2.71411	0.00749665	0.0341854		1.01272
CL18045.Contig11_All	2087	2.01	56.05	4.48095	2.71e-11	1.24e-09	5.47	51.46	3.53882	3.23393e-07	6.10801e-06		0.942123
CL7831.Contig2_All	1163	14.2	68.3	2.08574	4.39e-06	5.77e-05	54.4	85.82	1.22919	0.00226357	0.0126638		0.856543
CL17157.Contig3_All	1834	0.71	16.12	3.88364	0.000389698	0.00281574	2.25	17.37	3.20846	0.00177703	0.0103365		0.675183
CL16052.Contig1_All	1306	27.84	92.67	1.68089	0.00136641	0.00816036	43.6	59.07	1.01444	0.00349323	0.0181818		0.66645
CL2417.Contig4_All	2501	0	12.28	5.25411	0.000226805	0.00176807	0	8.39	4.62589	0.00251556	0.0138276		0.628221
CL7831.Contig21_All	1816	11.71	73.91	2.41872	1.23e-05	0.000142132	52.83	138.5	1.92309	2.43581e-07	4.76113e-06		0.495625
Unigene55461_All	2180	13.61	63.66	2.09534	1.16e-06	1.79e-05	23.1	49.5	1.71038	0.000640645	0.00437394		0.384965
CL8192.Contig3_All	1462	29.66	93.89	1.61025	0.00740805	0.0332578	42.47	69.43	1.34357	0.0069278	0.0320812		0.266674
CL20016.Contig21_All	2503	1.11	20.96	3.8455	0.000256904	0.00196765	1.14	11.78	3.58903	0.000383055	0.00283129		0.256466
CL8192.Contig2_All	1478	63.65	181.54	1.45518	0.00835136	0.0366968	93.62	135.53	1.20756	0.00848155	0.0378316		0.247623
Unigene55465_All	2117	21.86	58.38	1.27631	0.00287625	0.0152225	38.68	54.19	1.04002	0.00923896	0.0406295		0.236288
CL1644.Contig28_All	1727	26.31	80.32	1.46795	0.000448787	0.00317474	49.79	80.6	1.25631	0.000810797	0.00533585		0.211644
CL19928.Contig10_All	1857	58.26	202.26	1.69102	0.00506558	0.0243227	77.23	138.74	1.48266	0.000919245	0.00592625		0.208352
CL7831.Contig16_All	601	5.43	42.8	2.65357	9.53e-05	0.000839005	11.7	44.66	2.44592	1.20822e-06	1.94562e-05		0.207652
CL7831.Contig3_All	1863	93.18	339.4	1.79595	7.63e-06	9.37e-05	213.18	485.22	1.70803	8.34254e-05	0.000769979		0.087917
CL20016.Contig25_All	1942	0	106.79	8.01799	5.49e-11	2.36e-09	0	76.64	7.94218	1.07953e-10	4.91849e-09		0.0758096
CL1644.Contig20_All	1306	27.53	81.17	1.38421	0.000303518	0.00227267	47.42	78.47	1.32047	0.000646938	0.00441096		0.0637303
CL6469.Contig8_All	2336	65.42	405.48	2.54215	0.000132943	0.00111695	86.03	316.22	2.48202	3.1791e-07	6.01373e-06		0.0601346
CL1644.Contig12_All	1724	21.9	89.15	1.9495	3.76e-05	0.000375172	31.56	83.07	1.89346	5.7682e-05	0.000561879		0.0560439
CL4943.Contig2_All	1718	55.36	178.69	1.5858	8.17e-06	9.94e-05	69.62	143.28	1.566	0.00020071	0.00163252		0.0197973
CL2156.Contig1_All	1797	0	122.99	8.14547	3.18e-11	1.43e-09	0	86.64	8.14649	2.89605e-11	1.47647e-09		-0.00101506
CL20016.Contig6_All	2468	0	48.75	6.95836	9.59e-08	1.98e-06	0	34.65	7.05908	3.30554e-08	8.17806e-07		-0.100717
CL15061.Contig3_All	1453	14.21	65.66	2.08062	3.93e-06	5.23e-05	17.36	52.83	2.2155	1.89987e-07	3.82524e-06		-0.134882
CL20016.Contig1_All	2231	0	34.31	6.52301	1.01e-06	1.59e-05	0	25.48	6.66222	3.11548e-07	5.90576e-06		-0.139217
CL18045.Contig4_All	1960	9.16	33.13	1.73254	0.0032421	0.0168091	14	38.63	1.90053	0.00100523	0.00638754		-0.167986
Unigene51542_All	721	4.55	21.8	1.99113	0.00508001	0.0243775	6.24	18.75	2.16407	0.00103199	0.00653216		-0.172936
CL9534.Contig6_All	982	0	35.91	6.66201	3.41e-07	6.09e-06	0	30.31	6.872	1.08646e-07	2.33916e-06		-0.209987
CL20016.Contig19_All	2332	0	7.1	4.05204	0.0100787	0.0428162	0	6.45	4.30554	0.00590133	0.0280843		-0.2535
CL1644.Contig6_All	1742	38.76	116.56	1.46067	8.53e-05	0.000762367	46.35	104.82	1.7632	1.36908e-08	3.73309e-07		-0.302526
CL4134.Contig9_All	1969	40.28	184.57	2.13183	7.13e-06	8.82e-05	55.01	217.63	2.46434	4.68502e-08	1.11099e-06		-0.332513
CL20016.Contig29_All	2042	77.77	227.17	1.4138	4.03e-08	9.14e-07	79.99	185.39	1.75063	4.96694e-07	8.94645e-06		-0.336825
CL20016.Contig33_All	2390	0	72.77	7.43075	5.12e-09	1.44e-07	0	60.97	7.78363	2.22215e-10	9.44176e-09		-0.352881
CL2133.Contig13_All	1831	5.89	94.92	3.8656	1.55e-13	1.07e-11	8.05	102.29	4.21885	5.58935e-21	1.29091e-18		-0.353257
CL9098.Contig3_All	2280	38.98	131.71	1.56852	0.00384084	0.0193547	58.99	160.54	1.93775	0.00181666	0.0105308		-0.36923
CL9098.Contig2_All	2402	44.31	139.67	1.42814	0.00267015	0.0143168	78.54	211.26	1.82005	0.0041678	0.0210635		-0.391907
CL4144.Contig7_All	1800	40.43	261.04	2.61082	8.91e-10	2.97e-08	40.53	219.53	3.03124	2.30594e-25	8.78317e-23		-0.420418
CL15719.Contig2_All	2349	153.52	420.5	1.29078	7.37e-06	9.08e-05	122.97	273.66	1.78787	3.83108e-10	1.53819e-08		-0.497096
CL20016.Contig7_All	2490	0	20.49	5.28426	0.000400333	0.00288142	0	16.11	5.91634	2.1768e-05	0.000240948		-0.632079
CL4144.Contig6_All	1725	37.88	228.83	2.53165	3.54e-07	6.29e-06	36.78	231.6	3.22457	1.00225e-29	5.54154e-27		-0.69292
CL4134.Contig6_All	1837	42.92	104.14	1.14595	0.00292947	0.0154559	48.18	124.54	1.91	1.77774e-07	3.60559e-06		-0.764049
CL7110.Contig9_All	1794	0	116.62	7.96739	1.58e-10	6.2e-09	0	171.36	8.75361	6.72737e-13	4.67404e-11		-0.786213
CL20016.Contig20_All	2305	0.37	90.44	6.93679	6.1e-12	3.18e-10	0	61.37	7.76388	3.50282e-10	1.42138e-08		-0.827089
Unigene43902_All	1786	7.53	29.74	1.75547	0.00611659	0.0284252	6.38	29.19	2.659	8.45331e-06	0.000105899		-0.90353
CL2659.Contig2_All	2067	0	18.64	5.79392	2.78e-05	0.000288761	0	31.16	6.85669	1.5282e-07	3.1631e-06		-1.06278
CL7831.Contig1_All	1745	3.41	66.1	3.7129	0.000867555	0.00555715	4.1	90.08	4.88107	1.48871e-09	5.18527e-08		-1.16818
CL353.Contig78_All	1681	35.78	160.56	2.0564	0.0050373	0.0242163	8.27	77.55	3.47062	1.52943e-06	2.38707e-05		-1.41421
Unigene33113_All	1708	24.3	129.03	2.35695	0.000317845	0.00236513	13.74	160.2	3.84524	2.56852e-07	4.98809e-06		-1.48829
CL7110.Contig2_All	1945	21.97	100.72	2.03634	0.000871862	0.00558172	15.28	244.7	4.36292	1.07597e-11	5.99751e-10		-2.32658
CL2133.Contig4_All	1909	0.29	14.27	3.86961	0.00601051	0.0280349	0.35	61	6.87735	8.47556e-12	4.83437e-10		-3.00774
CL298.Contig9_All	1732	1.08	29.69	4.32278	2.28e-05	0.000243143	0	43.35	7.35931	4.45096e-09	1.37609e-07		-3.03653
CL771.Contig16_All	2275	14.83	440.34	4.71761	3.44e-10	1.25e-08	0	293.02	9.72198	1.38439e-17	2.0368e-15		-5.00437
