# Supplementary material
Source: MDPI journal article supplement (https://www.mdpi.com/2073-4395/12/12/2998)
Supplement: s1 [file s1 › Supplemental Table S6.xlsx]

## Sheet: P450
		TTS-VS-TTR					UTS-VS-UTR						E-J
Unigene	Length	TTS-Expression	TTR-Expression	log2FoldChange(TTR/TTS)	Pvalue	Padj	UTS-Expression	UTR-Expression	log2FoldChange(UTR/UTS)	Pvalue	Padj
CL2133.Contig4_All	1909	0	87.23	7.41799	5.64343e-08	1.36798e-06	1.65	36.49	4.19043	2.85267e-07	6.97756e-06		3.22756
CL2156.Contig4_All	1852	0	73.7	7.30542	7.37793e-08	1.7268e-06	0.74	27.39	4.79111	2.72775e-06	4.90063e-05		2.51431
CL4070.Contig3_All	1972	0	45.6	6.71171	1.65651e-06	2.67694e-05	0.64	22.61	4.57108	7.47263e-06	0.000116215		2.14062
CL20016.Contig13_All	2456	0	12.41	4.4387	0.00749191	0.0355318	3.25	27.81	2.78457	0.00288704	0.0174183		1.65413
CL21463.Contig48_All	2607	0	37.49	6.43137	6.46631e-06	8.86641e-05	0	13.2	4.83077	0.00265168	0.0162363		1.6006
Unigene27620_All	1241	0	14.94	5.19905	0.000735697	0.00517367	0.34	10.14	3.71931	0.00744019	0.0377772		1.47975
Unigene25590_All	4413	3.8	87.43	3.55005	4.52041e-09	1.42094e-07	10.69	50.44	2.17842	4.18071e-05	0.000508964		1.37162
CL20016.Contig1_All	2231	0	43.22	6.5863	4.32834e-06	6.23369e-05	0	28.65	5.33385	0.000829564	0.00622793		1.25245
CL14001.Contig3_All	1882	1.79	169.96	5.19847	1.35941e-06	2.25396e-05	2.71	71.35	4.15238	0.00122121	0.0085767		1.04609
CL20021.Contig8_All	1814	0.58	34.01	4.55007	4.17122e-06	6.03259e-05	1.37	17.74	3.51226	7.44745e-05	0.000829834		1.03782
CL21463.Contig85_All	3581	0	33.25	5.9894	6.07259e-05	0.000618316	0.32	20.58	4.99147	1.92306e-05	0.000261767		0.99793
CL14001.Contig5_All	726	2.62	56.63	3.42685	1.50878e-05	0.000184839	5.05	33.24	2.56756	0.00054104	0.00436798		0.859294
CL20016.Contig10_All	2577	6.78	65.94	2.35009	0.00680899	0.0328409	21.42	62.71	1.53637	0.0100481	0.0479877		0.813717
CL13190.Contig4_All	1988	0	130.59	8.00449	1.16871e-09	4.19969e-08	0	67.85	7.23686	1.67689e-07	4.41611e-06		0.767623
CL19928.Contig14_All	1951	11.23	205.03	2.96551	0.00187494	0.0113826	26.38	117.84	2.25382	1.07537e-05	0.000159261		0.711689
CL20016.Contig25_All	1942	0	81.4	7.34568	7.2172e-08	1.69459e-06	0	55.45	6.65515	4.86361e-06	8.02065e-05		0.690525
CL771.Contig16_All	2275	10.27	692.95	4.83973	5.03283e-10	1.95853e-08	15.61	408.38	4.17539	5.59058e-07	1.24839e-05		0.664335
Unigene33285_All	1585	1.1	54.92	4.27443	1.01886e-05	0.00013136	1.48	21.28	3.65393	0.000247816	0.00227563		0.620499
CL2053.Contig15_All	1879	6.17	135.93	3.52737	4.30307e-10	1.70394e-08	13.42	110.67	3.14641	0.00031425	0.00277505		0.380954
Unigene12305_All	4846	11.16	74.96	1.8972	8.27359e-05	0.000807194	19.24	56.13	1.52472	0.00711069	0.0363979		0.372477
Unigene7535_All	1301	0	10.15	4.8554	0.00191973	0.0116104	0	9.83	4.54195	0.00523197	0.0283826		0.313445
CL20021.Contig11_All	1783	0	37.78	6.30159	1.55444e-05	0.000189904	0	17.73	6.00203	2.92981e-05	0.000375104		0.299559
CL14001.Contig8_All	1895	7.16	294.87	4.37421	1.97625e-08	5.36727e-07	6.9	123.64	4.07711	8.68371e-06	0.000132629		0.297097
CL4144.Contig7_All	1800	56.49	377.89	1.91712	2.55501e-05	0.000293036	101.71	303.51	1.64688	0.00164731	0.0110067		0.270234
CL20016.Contig20_All	2305	0	126.35	7.80874	6.79866e-09	2.05026e-07	0	70.81	7.55496	1.80924e-08	6.37605e-07		0.253781
Unigene16494_All	1460	2.65	57.57	3.43156	0.00193981	0.0117114	7.93	74.24	3.18415	0.000102414	0.00108535		0.247409
CL397.Contig21_All	4105	64.41	319.04	1.42931	0.00141815	0.00900466	79.02	192.07	1.29225	0.00549796	0.029537		0.137055
Unigene22165_All	3170	0	54.4	6.66614	3.3162e-06	4.93893e-05	0	28.67	6.53871	3.1571e-06	5.55666e-05		0.127432
CL20021.Contig6_All	1796	0.55	53.07	5.10404	3.44569e-07	6.79768e-06	0.32	19.06	5.02318	1.81367e-05	0.000249033		0.0808633
CL20021.Contig10_All	1835	0	11.01	4.75275	0.00276202	0.0157123	0	6.43	4.72826	0.00237013	0.0148224		0.0244892
CL4144.Contig6_All	1725	53.67	395.14	2.02821	3.83717e-06	5.6122e-05	86.58	338.69	2.04074	1.0858e-05	0.00016059		-0.0125391
Unigene21820_All	4409	0	40.44	6.46532	5.91088e-06	8.19166e-05	0	26.87	6.5594	2.42741e-06	4.42875e-05		-0.0940778
CL7110.Contig9_All	1794	0	76.24	7.35507	6.15583e-08	1.47405e-06	0	57.95	7.47041	2.92832e-08	9.68819e-07		-0.115342
CL20016.Contig6_All	2468	0	54.6	6.92057	6.27022e-07	1.14844e-05	0	43.73	7.07171	2.39778e-07	6.02205e-06		-0.151134
CL2133.Contig13_All	1831	20.39	180.36	2.24649	7.49323e-06	0.000100693	22.95	128.96	2.43127	5.55184e-07	1.241e-05		-0.184785
CL17743.Contig16_All	5544	39.33	153.55	1.15902	0.00673173	0.0325316	52.43	131.14	1.37172	0.00167661	0.0111597		-0.212699
CL20016.Contig7_All	2490	0	18.2	5.54685	0.000234922	0.00196684	0	18.66	5.84799	6.90052e-05	0.000779091		-0.301145
Unigene33113_All	1708	11.9	164.91	2.71039	0.00391935	0.0209456	8.02	79.63	3.02909	0.00403608	0.0229698		-0.318698
Unigene18875_All	1736	9.73	54.86	1.69201	0.000315392	0.00252922	11.24	47.03	2.01325	0.000903078	0.00667042		-0.321234
CL3457.Contig3_All	1593	0.28	32.96	5.06666	3.48147e-05	0.000383077	0	18.53	5.472	0.000489304	0.00401781		-0.405332
CL20016.Contig19_All	2332	0	11.57	4.96994	0.00137994	0.00880372	0	13.53	5.47997	0.000241991	0.00223239		-0.510037
CL9863.Contig7_All	1868	0.55	14.32	3.31162	0.00488207	0.0250808	3.08	67.02	3.91073	0.00284653	0.0172311		-0.599107
CL3457.Contig2_All	1000	0.28	18.66	4.3323	0.000428492	0.0032819	0	8.86	4.97078	0.00152627	0.0103263		-0.638483
Unigene22896_All	2815	0.33	31.41	5.14142	7.7761e-06	0.000104021	0	19.25	5.79153	8.79341e-05	0.00095356		-0.650111
CL21463.Contig52_All	1906	0	16.11	5.29573	0.000582496	0.00425693	0	19.19	6.07868	2.17591e-05	0.000290817		-0.782955
CL14001.Contig10_All	1893	3.97	159.13	4.44258	9.33398e-12	5.19511e-10	2.02	95.29	5.29823	1.27656e-11	1.03042e-09		-0.855648
CL20789.Contig3_All	911	0.28	9.61	3.40511	0.00985093	0.0443799	0	7.03	4.26656	0.0095281	0.0460523		-0.861457
CL20016.Contig33_All	2390	0	82.92	6.88287	2.343e-06	3.6402e-05	0	72.21	7.75082	3.78135e-09	1.62712e-07		-0.867944
Unigene6863_All	1903	0.88	16.34	3.11461	0.00232413	0.0136117	2.36	41.51	4.01587	2.39553e-06	4.37739e-05		-0.901254
CL17833.Contig4_All	1770	3.12	115.45	4.0465	0.000372546	0.00291151	1.03	52.95	4.95606	0.000100714	0.00106971		-0.909556
Unigene31229_All	3095	1.93	42.88	3.1123	0.00388614	0.0207953	1.45	33.17	4.2624	9.30245e-06	0.000140798		-1.15011
Unigene43902_All	1786	6.81	49.56	2.06476	0.000154536	0.00137495	3.08	32.18	3.22811	6.62746e-06	0.000104906		-1.16335
CL14001.Contig4_All	1866	0.55	27.63	4.06802	0.00116076	0.00761358	0	11.74	5.28386	0.000625212	0.00492654		-1.21584
Unigene26508_All	3179	63.45	352.01	1.54613	0.00347293	0.018939	23.78	191.79	2.93915	3.25027e-08	1.0606e-06		-1.39303
Unigene15376_All	1094	0.55	14.08	3.27875	0.00487848	0.0250656	0.34	18.05	4.93782	2.41045e-05	0.000317657		-1.65907
CL21463.Contig81_All	2918	0.28	16.31	4.20045	0.000518976	0.00386023	0	18.29	6.00634	3.162e-05	0.000400237		-1.80589
CL2133.Contig1_All	1784	0.61	71.13	5.42042	1.54141e-07	3.32992e-06	0	65.71	7.46271	3.31927e-08	1.08051e-06		-2.04229
CL2156.Contig1_All	1797	9.12	117.31	2.51119	0.00804948	0.0376505	0	95.98	7.99683	8.88139e-10	4.51e-08		-5.48564

## Sheet: glu
		TTS-VS-TTR					UTS-VS-UTR						E-J
Unigene	Length	TTS-Expression	TTR-Expression	log2FoldChange(TTR/TTS)	Pvalue	Padj	UTS-Expression	UTR-Expression	log2FoldChange(UTR/UTS)	Pvalue	Padj
CL7025.Contig13_All	1688	0	46.49	6.66328	2.36898e-06	3.67472e-05	1.01	16.69	3.37487	0.00338065	0.0198585		3.28841
Unigene33078_All	1236	0	676.52	9.97461	5.51336e-16	6.38994e-14	1.28	363.75	7.51243	3.04038e-16	6.40072e-14		2.46217
CL7025.Contig14_All	1813	0	48.07	6.57382	4.46737e-06	6.41082e-05	0.68	23.19	4.28855	0.000198185	0.00188613		2.28527
Unigene9587_All	6623	1.74	113.92	4.93921	3.4631e-12	2.0988e-10	9.47	79.81	2.97927	2.8902e-08	9.58323e-07		1.95994
CL3311.Contig12_All	1219	1.76	69.62	4.20033	1.75123e-07	3.73141e-06	3.94	26.51	2.38105	0.0104983	0.0497185		1.81928
Unigene11004_All	2829	0	76.21	7.20596	1.78179e-07	3.78964e-06	0.74	46.11	5.48045	2.85802e-08	9.49841e-07		1.72551
CL7117.Contig50_All	1846	0	207.61	8.57856	2.57752e-11	1.31252e-09	0.69	174.36	7.44274	5.50029e-17	1.31684e-14		1.13582
Unigene30056_All	2750	3.12	47.23	3.09107	2.40032e-06	3.71696e-05	10.01	40.88	2.00764	0.00024267	0.00223771		1.08343
CL1370.Contig17_All	2010	0	9.34	4.63721	0.0037936	0.0203776	0.34	7.66	3.63183	0.00546057	0.0293702		1.00538
CL10495.Contig6_All	932	0.58	68.88	5.50742	1.11625e-08	3.20057e-07	1.72	60.41	4.57193	7.23196e-06	0.000112962		0.935493
CL7025.Contig8_All	1510	0	37.42	6.2858	1.49561e-05	0.000183507	0	14.31	5.62668	0.000137958	0.0013934		0.659122
CL7117.Contig2_All	1549	14	307.27	3.58167	1.49707e-14	1.38189e-12	22.18	198.88	3.15288	1.01382e-15	1.93967e-13		0.42879
Unigene58239_All	894	5.6	246	4.63855	1.76743e-17	2.57412e-15	3.3	72.59	4.22021	8.27209e-09	3.23338e-07		0.418346
CL7117.Contig7_All	2094	0	9.08	4.70918	0.00282912	0.0160123	0	8.42	4.34529	0.00815441	0.0406286		0.363893
CL1370.Contig5_All	1889	0.63	24.93	4.16543	4.55217e-05	0.000483189	1.06	21.13	4.00089	2.63702e-05	0.000342849		0.164538
CL4327.Contig5_All	965	0	53.71	6.70714	3.22244e-06	4.8156e-05	0	36.6	6.69328	3.40696e-06	5.92572e-05		0.0138595
CL7117.Contig45_All	888	27.65	153.88	1.63676	0.000796405	0.0055362	28.4	98.21	1.66846	0.00332583	0.0195934		-0.0316973
CL3311.Contig4_All	816	0.83	63.28	4.89889	1.7126e-07	3.65752e-06	1.08	41.23	4.9358	3.76296e-08	1.20711e-06		-0.0369094
CL165.Contig12_All	1242	28.73	123.21	1.30235	0.00273725	0.0155966	43.14	117.9	1.37096	0.00351207	0.0204805		-0.0686101
CL7117.Contig25_All	1823	0	30.8	6.24045	1.3918e-05	0.000172453	0	26.24	6.45826	3.99937e-06	6.78334e-05		-0.217817
CL21375.Contig5_All	1467	25.22	104.21	1.19513	0.0111907	0.0490625	37.64	100.8	1.45593	0.00488143	0.0268285		-0.260808
CL5582.Contig5_All	2197	51.35	252.84	1.45618	0.000982799	0.00661497	55.43	201.87	1.87698	0.000109195	0.00114536		-0.420797
CL7025.Contig11_All	1492	0	14.05	5.16924	0.000778602	0.00542788	0	14.31	5.71126	9.63773e-05	0.00103038		-0.542013
CL3311.Contig9_All	1123	0	58.08	6.98983	4.3309e-07	8.30198e-06	0	63.2	7.53805	1.34841e-08	4.95724e-07		-0.548218
CL3707.Contig8_All	1515	1.85	171.18	5.56693	3.39592e-16	4.09501e-14	1.72	140.05	6.13354	7.01358e-19	2.26346e-16		-0.566604
CL1012.Contig4_All	1527	0.61	14.76	3.3748	0.00256743	0.0147885	0.37	9.36	3.98088	0.00218605	0.0138746		-0.606075
CL7117.Contig31_All	1909	0.28	269.49	8.0053	2.20033e-15	2.30663e-13	0	184.58	8.92053	7.50132e-13	8.10916e-11		-0.915232
CL7117.Contig44_All	1484	3	60.83	3.38489	9.46181e-07	1.64395e-05	1.28	45.13	4.35897	4.54411e-05	0.000545702		-0.974087
CL7117.Contig39_All	1843	0	15.74	4.52098	0.0067536	0.0326248	0	21.79	5.51974	0.000401341	0.00340226		-0.998758
Unigene58228_All	1084	91.14	384.81	1.2636	0.00328506	0.0181098	24.87	121.11	2.29202	2.94758e-05	0.000377105		-1.02842
CL3707.Contig10_All	1272	24.06	219.98	2.31687	1.8025e-06	2.88608e-05	13.58	144.27	3.41041	6.46403e-13	7.12026e-11		-1.09355
CL7131.Contig1_All	1083	4.16	36.06	2.27123	0.00313885	0.0174349	1.67	21.35	3.45061	0.000121874	0.00125696		-1.17938
Unigene14255_All	909	14.23	98.24	2.00763	0.000159752	0.00141498	8.13	92.55	3.25458	1.91725e-06	3.61052e-05		-1.24695
CL4327.Contig6_All	873	1.24	153.56	5.79323	9.19248e-09	2.68874e-07	0.66	150.67	7.04949	5.99046e-11	4.10887e-09		-1.25626
CL7117.Contig32_All	1896	0.55	304.18	7.49289	2.56301e-16	3.15772e-14	0	197.62	8.95205	6.88182e-13	7.51321e-11		-1.45916
CL20976.Contig2_All	990	5.87	573.7	5.62005	3.73706e-09	1.19803e-07	9.31	1927.25	7.12064	5.03732e-11	3.53199e-09		-1.50059
CL1370.Contig32_All	1911	0.33	34.88	5.22335	5.32101e-06	7.47606e-05	0	38.71	6.8401	7.76295e-07	1.65825e-05		-1.61676
CL19209.Contig3_All	2947	0.3	20.06	4.2373	0.00154758	0.0096946	0	34.23	6.37988	9.79468e-06	0.000147123		-2.14258
Unigene7876_All	1404	0.83	20.71	3.29821	0.00304821	0.0170185	0	13.68	5.48906	0.000265739	0.00241235		-2.19085
CL7117.Contig24_All	1576	3.36	85.96	3.72687	7.69562e-07	1.37455e-05	0.64	86.26	6.33422	1.45784e-11	1.15903e-09		-2.60736
Unigene59606_All	893	3.97	32.62	2.20185	0.000408019	0.00314749	2.02	69.62	4.94326	3.69161e-12	3.37567e-10		-2.74141

## Sheet: gly
		TTS-VS-TTR					UTS-VS-UTR						E-J
Unigene	Length	TTS-Expression	TTR-Expression	log2FoldChange(TTR/TTS)	Pvalue	Padj	UTS-Expression	UTR-Expression	log2FoldChange(UTR/UTS)	Pvalue	Padj
CL1681.Contig5_All	3010	0	136.69	8.00338	2.00606e-09	6.82793e-08	14.57	84.62	2.55291	0.00958338	0.0462674		5.45047
CL2256.Contig13_All	1685	23.11	220.14	2.36364	6.96012e-05	0.000695321	33.46	107.69	1.6183	0.0043362	0.0243428		0.745332
CL12316.Contig4_All	1777	3.45	213.86	5.0981	2.46228e-19	4.56599e-17	5.37	140.28	4.42057	1.48185e-08	5.36941e-07		0.677533
CL2187.Contig3_All	1660	4.16	98.27	3.5071	2.25977e-06	3.52646e-05	8.13	80.83	2.88521	0.00110607	0.00788773		0.62189
CL14022.Contig4_All	1939	18.37	119.68	1.9232	8.87338e-05	0.00085725	37.51	89.46	1.32273	0.0010688	0.00766761		0.600471
CL2491.Contig9_All	1835	1.21	73.88	4.77025	7.77728e-08	1.81231e-06	1.37	37.82	4.35719	7.25969e-06	0.000113325		0.41306
Unigene22843_All	1281	50.11	496.05	2.48453	2.04134e-13	1.5554e-11	67.17	291.46	2.09872	4.64091e-09	1.94845e-07		0.385806
CL11547.Contig2_All	2306	2.43	279.22	5.85637	6.14963e-16	7.06224e-14	2.59	178.52	5.63121	1.32939e-11	1.06768e-09		0.225161
CL1409.Contig8_All	1792	18.14	110.84	1.83092	1.13787e-05	0.000144355	23.8	68.44	1.65116	0.00758207	0.0383484		0.179752
CL21364.Contig12_All	1712	25.8	355.46	2.91666	2.69152e-08	7.06553e-07	42.41	278.74	2.74137	3.84283e-06	6.55823e-05		0.175292
CL21009.Contig8_All	1523	0	72.01	7.21412	1.39707e-07	3.04918e-06	0	50.02	7.1536	1.86857e-07	4.85865e-06		0.0605179
CL21418.Contig25_All	2242	8.87	444.15	4.48993	5.39615e-10	2.08196e-08	8.49	206.66	4.43843	1.23762e-11	1.00451e-09		0.0515002
CL21418.Contig3_All	2543	0.3	146.39	7.16248	6.33548e-12	3.64975e-10	0.34	94.93	7.11663	4.73337e-11	3.33757e-09		0.0458474
CL6187.Contig3_All	1624	0	25.99	5.93218	5.57695e-05	0.000575236	0	16.5	5.92955	4.72245e-05	0.000563543		0.00263294
CL11547.Contig5_All	2236	37.2	770.96	3.56423	1.62698e-10	7.1018e-09	33.25	429.5	3.61497	2.80397e-11	2.08035e-09		-0.0507362
CL21418.Contig10_All	1835	2.04	124.91	4.87436	2.11161e-10	8.99097e-09	4.21	162.42	5.08259	2.84672e-07	6.96591e-06		-0.208233
CL1279.Contig5_All	1788	3.58	82.76	3.60399	7.24979e-06	9.77988e-05	7.22	104.96	3.81636	2.18869e-05	0.000292179		-0.212373
CL19447.Contig3_All	3535	3.67	40.12	2.57178	0.000525372	0.0038989	4.19	33.75	2.86282	0.000878869	0.00652882		-0.291046
CL21009.Contig18_All	1034	13.28	138.5	2.40824	0.000637494	0.00458872	12.63	102.69	2.81667	0.00221371	0.0140178		-0.408432
Unigene31684_All	1681	5.29	69.3	2.72886	1.97247e-05	0.000234177	3.4	38.07	3.17589	0.000917665	0.00676144		-0.447032
Unigene41200_All	1698	6.03	106.16	2.92434	0.00185604	0.0112842	6.92	96.42	3.52835	0.000400928	0.00339942		-0.604011
CL44.Contig4_All	2299	23.88	96.11	1.28934	0.00450326	0.0234479	15.93	77.21	2.18846	0.000116842	0.00121273		-0.899118
CL2256.Contig22_All	1705	1.21	18.11	2.85381	0.00240792	0.0140152	0.69	12.51	3.75982	0.00168771	0.01122		-0.906016
CL1047.Contig8_All	2629	15.49	65.32	1.27473	0.00359415	0.0194841	5.86	27.42	2.18535	0.00299197	0.0179353		-0.910612
CL21009.Contig11_All	1548	2.79	145.66	4.75066	8.35269e-11	3.86413e-09	1.65	109.48	5.74071	9.67351e-15	1.53702e-12		-0.990041
CL21418.Contig32_All	2125	15.3	389.81	3.90244	1.20914e-11	6.53951e-10	13.81	472.84	5.01778	8.21168e-09	3.21333e-07		-1.11534
CL21324.Contig2_All	1629	0.33	15.87	4.1967	0.000878825	0.00601408	0	12.31	5.58403	0.000152633	0.00151643		-1.38733
CL2491.Contig18_All	1591	6.51	42.51	1.95517	0.0043386	0.0227664	1.85	22.19	3.42806	0.00202232	0.0130181		-1.47289
CL18748.Contig3_All	1748	0.91	43.97	4.29314	0.000157806	0.00140023	0	18.65	5.91209	6.74768e-05	0.000764136		-1.61896
CL21418.Contig26_All	2285	122.86	521.57	1.26928	0.000410111	0.00316086	32.61	247.93	2.95723	5.19101e-06	8.49459e-05		-1.68795
CL486.Contig2_All	1637	5.13	112.46	3.58849	1.31626e-05	0.000164041	2.02	95.99	5.30633	2.27017e-09	1.03178e-07		-1.71784
CL76.Contig6_All	1793	11.8	97.66	2.19471	0.0024698	0.0143199	9.68	149.07	3.95062	1.36429e-08	5.00726e-07		-1.75591
CL4015.Contig4_All	1798	4.06	146.77	4.25566	1.59158e-08	4.40414e-07	2.21	277.11	6.6518	4.57143e-13	5.20412e-11		-2.39614

## Sheet: est
		TTS-VS-TTR					UTS-VS-UTR						E-J
Unigene	Length	TTS-Expression	TTR-Expression	log2FoldChange(TTR/TTS)	Pvalue	Padj	UTS-Expression	UTR-Expression	log2FoldChange(UTR/UTS)	Pvalue	Padj
CL20231.Contig2_All	1894	0	47.24	6.4032	1.22443e-05	0.000154058	4.18	91.87	3.80501	0.00123354	0.00864623		2.59819
CL3838.Contig15_All	1359	0.55	152.59	6.60983	2.8226e-13	2.0918e-11	2.89	110.28	4.66503	4.28072e-06	7.18173e-05		1.94481
Unigene32797_All	2897	0.28	38.46	5.1956	1.46456e-05	0.000180338	1.48	17.34	3.43103	0.000903529	0.00667179		1.76458
Unigene19250_All	1687	3.08	147.98	4.3199	4.05298e-07	7.84002e-06	6.53	51.46	2.65252	0.00402931	0.0229372		1.66738
CL20415.Contig5_All	1646	6.59	155.27	3.66994	8.79522e-14	7.17984e-12	8.84	42.53	2.04862	0.00503326	0.0274948		1.62132
Unigene25476_All	842	0	13.52	5.20054	0.000661936	0.00473386	0.34	7.74	3.61964	0.00570083	0.030421		1.58091
Unigene59585_All	628	0	53.42	6.84939	1.182e-06	1.99803e-05	0.32	27.85	5.31934	1.44215e-05	0.000205116		1.53005
Unigene27121_All	3551	4.24	58.88	2.83228	0.000388949	0.00302104	21.54	54.97	1.45301	0.00700917	0.0359566		1.37927
Unigene21319_All	1342	0.66	28.03	4.28753	3.41879e-05	0.000377082	1.05	11.06	2.97051	0.00720361	0.0367795		1.31701
CL6462.Contig6_All	1333	0.28	29.79	4.97061	1.88416e-05	0.000224784	0.32	10.44	4.06143	0.00115566	0.00818703		0.909183
CL21197.Contig10_All	2284	4.52	51.14	2.56732	0.000176482	0.00154153	11.59	39.39	1.78294	0.00339958	0.0199372		0.78438
Unigene48157_All	1199	0.28	34.43	5.20264	4.62278e-06	6.61011e-05	0.37	16.25	4.44064	0.000638264	0.00500834		0.761999
CL15167.Contig40_All	2518	0	12.28	5.08554	0.00095195	0.00643763	0	8.5	4.46185	0.00622002	0.0326477		0.623691
CL2922.Contig5_All	1444	16.16	242.34	3.04151	4.08358e-08	1.02749e-06	21.71	144.11	2.4354	0.00085081	0.00636088		0.606114
CL20994.Contig2_All	3897	3.72	78.37	3.22825	0.000192036	0.00165633	6.89	61.47	2.92791	0.00105314	0.00757624		0.300345
Unigene16949_All	2524	0	34.45	6.30219	1.17461e-05	0.000148512	0	20.03	6.04056	2.71474e-05	0.00035145		0.261624
Unigene37448_All	1829	1.76	33.5	3.17774	9.47658e-05	0.000906466	2.45	21.29	2.96755	0.000671923	0.00522153		0.210198
Unigene18924_All	1195	0.3	96.14	6.58406	7.84329e-10	2.92044e-08	0.34	61.37	6.38252	1.06979e-08	4.04346e-07		0.201538
Unigene17336_All	2910	0	31.31	6.1555	2.2846e-05	0.00026594	0	16.66	5.96471	3.49138e-05	0.0004353		0.190785
CL5834.Contig3_All	765	0	9.85	4.81897	0.00208501	0.012436	0	6.12	4.65232	0.00292586	0.0176091		0.166658
CL14540.Contig21_All	918	0.33	33.21	5.20771	4.89369e-06	6.9506e-05	0.32	22.01	5.10377	1.6756e-05	0.000232685		0.103935
Unigene7413_All	763	2.48	76.91	4.07	1.47438e-09	5.18791e-08	3.9	71.64	4.07094	2.03085e-09	9.36784e-08		-0.000932957
Unigene9000_All	1225	0	36.01	6.38147	7.91463e-06	0.000105626	0	29.7	6.40459	6.7511e-06	0.000106595		-0.0231213
CL7778.Contig4_All	2288	8.78	285.92	3.76297	4.59017e-05	0.000486547	11.61	176.36	3.7944	2.79731e-10	1.61928e-08		-0.0314252
Unigene16728_All	1819	2.4	39.65	3.12878	0.00024301	0.00202251	1.75	16.97	3.17397	0.000403344	0.00341579		-0.0451979
CL20994.Contig5_All	3214	5.3	67.19	2.67683	0.0026495	0.0151857	4.73	36.96	2.74154	0.000224419	0.00209651		-0.0647095
Unigene52358_All	869	0	110.38	7.80851	4.08921e-09	1.29698e-07	0	91.55	8.02919	5.40853e-10	2.92878e-08		-0.220676
CL3838.Contig18_All	1376	30.91	191.51	1.8385	2.4182e-07	4.97715e-06	31.5	129.61	2.06228	1.07611e-07	3.01799e-06		-0.223781
CL7812.Contig4_All	1237	7.64	44.93	1.7228	0.00243057	0.0141306	8.68	35.59	2.00624	0.000476522	0.00393012		-0.283443
CL12785.Contig3_All	1206	10.34	54.55	1.59189	0.00104512	0.00696992	9.46	34.75	1.95517	0.00107924	0.00773022		-0.36328
CL19740.Contig11_All	1299	1.19	18.02	2.83084	0.00356859	0.0193682	1.4	14.95	3.20381	0.00094114	0.00690467		-0.372967
CL2922.Contig2_All	1383	7.66	130.6	3.19123	4.03857e-07	7.81656e-06	5.48	82.17	3.59296	1.00126e-06	2.06302e-05		-0.401724
CL7620.Contig11_All	1436	17.14	134.01	2.03783	0.00035273	0.00278272	19.83	110.12	2.476	3.31899e-07	7.94825e-06		-0.438169
CL92.Contig60_All	2181	2.26	96.42	4.18307	3.93652e-07	7.64343e-06	1.45	44.42	4.66118	9.86343e-08	2.80551e-06		-0.478112
Unigene40381_All	2251	7.55	72.64	2.43349	1.88592e-05	0.000224979	5.15	46.85	2.91184	0.00108338	0.00775637		-0.47835
Unigene33083_All	1079	0.58	183.58	6.91543	9.1744e-15	8.75823e-13	0.34	114.55	7.44863	5.78929e-13	6.42392e-11		-0.533204
CL18882.Contig18_All	1385	0.61	24.75	4.1367	7.90075e-05	0.000775594	0.34	17.11	4.70106	0.000110463	0.00115701		-0.564361
CL4035.Contig13_All	1547	1.32	363.42	7.10074	4.42851e-21	1.03884e-18	1.61	583.07	7.72792	1.24616e-18	3.85233e-16		-0.627186
Unigene29773_All	884	0	18.59	5.5163	0.000245261	0.00203855	0	22.2	6.14999	1.75992e-05	0.000242635		-0.633693
CL20662.Contig13_All	2423	4.46	29.96	1.83292	0.00961695	0.0435432	3.7	24.45	2.49523	0.00557226	0.0298643		-0.662308
CL9410.Contig2_All	976	0	17.66	5.42427	0.000404768	0.00312707	0	29.58	6.09936	3.56863e-05	0.000443613		-0.675094
CL2541.Contig7_All	1530	1.82	396.96	6.7452	4.44763e-25	1.61339e-22	1.11	243.63	7.42762	4.43274e-16	9.04033e-14		-0.682412
CL244.Contig26_All	1719	0.99	241.51	6.60691	3.6981e-09	1.18684e-07	0.74	210.39	7.60759	5.55646e-14	7.63723e-12		-1.00067
CL7620.Contig14_All	1450	9.5	74.78	1.93854	0.00841798	0.0390368	7.15	67.15	3.16401	1.49996e-07	4.01069e-06		-1.22547
Unigene21110_All	915	0.28	12.83	3.85151	0.00275602	0.0156838	0	9.45	5.25486	0.000503213	0.00411233		-1.40335
CL1070.Contig25_All	1494	0.61	34.55	4.53948	6.90762e-05	0.000690703	0	16.95	5.95207	4.27682e-05	0.000518586		-1.41259
CL20265.Contig14_All	2230	4.88	67.21	2.86811	6.43616e-06	8.82852e-05	1.33	36.54	4.37046	6.91365e-07	1.49974e-05		-1.50234
Unigene51640_All	898	0.83	25.83	3.55182	0.000801902	0.00557044	0.34	23.58	5.1309	1.2803e-05	0.000185191		-1.57908
CL1626.Contig2_All	2722	9.1	149.46	3.24145	8.30075e-05	0.000809575	5.65	188.33	4.9565	1.07148e-07	3.0069e-06		-1.71505
CL15584.Contig1_All	1437	3.94	67.95	3.25925	1.21232e-07	2.69408e-06	1.01	43.24	5.09631	4.80897e-08	1.4945e-06		-1.83706
CL15167.Contig5_All	2401	0.91	28.85	3.815	0.000134678	0.00122364	0	26.42	5.6708	0.00022084	0.00206746		-1.8558
CL12179.Contig5_All	1518	5.05	55.69	2.57711	0.0024253	0.0141024	2.69	68.51	4.51759	4.54353e-11	3.21677e-09		-1.94048
CL20263.Contig3_All	1559	209.84	816.24	1.18512	0.000842215	0.00580667	77.4	1107.49	3.64947	8.29619e-10	4.24958e-08		-2.46435
Unigene51639_All	880	1.16	30.6	3.59947	4.62021e-05	0.000489113	0	21.28	6.24948	1.02347e-05	0.000152627		-2.65
CL15167.Contig2_All	2857	1.74	55.2	3.85857	1.60468e-06	2.60273e-05	0	28.08	6.55114	2.65318e-06	4.78224e-05		-2.69257
CL4035.Contig10_All	1525	235.67	2043.81	2.30587	1.43717e-07	3.12738e-06	78.69	3268.26	5.15974	2.99516e-16	6.32062e-14		-2.85387
CL7523.Contig3_All	1088	3.2	74.95	3.71121	2.56981e-06	3.94554e-05	0.32	72.34	6.58018	5.03409e-09	2.0916e-07		-2.86897
CL12449.Contig1_All	942	1.49	21.82	2.84178	0.00205657	0.0122897	0	15.32	5.74471	8.51408e-05	0.000928308		-2.90293
CL5709.Contig9_All	2487	52.12	291.09	1.77428	0.0102327	0.045696	17.57	528.39	4.90514	1.87157e-10	1.12786e-08		-3.13085

## Sheet: ABC
		TTS-VS-TTR					UTS-VS-UTR						E-J
Unigene	Length	TTS-Expression	TTR-Expression	log2FoldChange(TTR/TTS)	Pvalue	Padj	UTS-Expression	UTR-Expression	log2FoldChange(UTR/UTS)	Pvalue	Padj
CL10265.Contig17_All	2461	0.3	24.69	4.69301	0.000122199	0.00112661	4.98	24.32	2.28253	0.00217893	0.0138374		2.41048
CL21332.Contig7_All	1362	1.54	42.83	3.83929	1.43224e-06	2.35519e-05	3.84	27.51	2.78624	0.000172208	0.00167741		1.05305
CL474.Contig17_All	4114	6.51	77.69	2.53738	0.00544455	0.0274042	18.98	56.42	1.55545	0.00644292	0.0335886		0.981933
CL6253.Contig6_All	5463	84.43	549.71	1.91099	6.04938e-07	1.11258e-05	144.71	388.76	1.3172	0.00775093	0.0390166		0.593788
Unigene32202_All	1870	10.09	89.41	2.38078	6.75987e-07	1.22798e-05	20.77	95.07	2.11632	0.000685397	0.00530774		0.264457
Unigene15188_All	3616	21.23	240.84	2.73581	2.76819e-12	1.70765e-10	20.62	142.82	2.49711	0.0024083	0.0150153		0.238697
Unigene31181_All	5532	16.43	94.62	1.68588	0.000447495	0.00340292	29.41	81.58	1.55825	0.00187258	0.0122254		0.127626
CL919.Contig21_All	4391	39.15	177.2	1.38766	0.000105115	0.000991924	56.29	134.14	1.2883	0.00358331	0.0208084		0.0993593
CL10624.Contig5_All	3256	1.9	44.56	3.63475	3.49739e-06	5.16983e-05	2.39	30.89	3.5675	5.83431e-07	1.29461e-05		0.0672574
CL5608.Contig2_All	2629	0	279.93	8.9416	1.50544e-12	9.70536e-11	0	182.04	8.91911	7.32323e-13	7.93611e-11		0.0224868
CL21038.Contig8_All	3807	11.27	56.46	1.50757	0.00167683	0.0103659	14.1	46.52	1.64276	0.00523164	0.0283826		-0.13519
CL3103.Contig2_All	2289	50.85	187.39	1.14151	0.00102008	0.0068249	58.58	162.3	1.43878	0.00813733	0.0405585		-0.297275
Unigene27801_All	1443	0.55	69.62	5.49373	3.82379e-08	9.67551e-07	1.37	107.93	5.82809	1.53969e-11	1.2188e-09		-0.334351
Unigene24722_All	1378	1.19	279.59	6.58369	1.5337e-14	1.41422e-12	2.06	326.51	6.94584	3.96418e-22	2.0247e-19		-0.362149
CL19978.Contig4_All	1337	1.9	20.27	2.55384	0.00351829	0.0191484	1.38	15.32	3.08028	0.00244531	0.0151923		-0.526442
CL16515.Contig2_All	3342	0	28.51	6.0789	2.88319e-05	0.000325246	0	30.44	6.63383	1.88365e-06	3.55826e-05		-0.554925
Unigene51448_All	894	1.32	45.32	4.12213	0.000104245	0.000984456	1.01	35.88	4.74635	4.14771e-07	9.63941e-06		-0.624218
CL5608.Contig4_All	2674	0	49.66	6.80492	1.07684e-06	1.83901e-05	0	63.59	7.43481	3.07262e-08	1.01162e-06		-0.629889
CL19978.Contig5_All	5170	171.1	918.48	1.69124	7.1361e-07	1.28702e-05	124.01	664.98	2.33778	3.9552e-06	6.71768e-05		-0.646541
Unigene51450_All	2521	30.33	467.32	3.1709	2.94177e-08	7.6517e-07	14.07	209.76	3.83037	1.94689e-08	6.78649e-07		-0.659473
CL474.Contig18_All	4256	34.85	249.92	2.09207	2.34316e-08	6.24706e-07	29.07	184.72	2.77016	7.29991e-06	0.000113862		-0.67809
CL19978.Contig8_All	5239	325.75	1663.77	1.64329	3.86604e-05	0.000419602	213.45	1290.22	2.5295	4.02573e-08	1.27883e-06		-0.886216
Unigene35479_All	4703	67.87	505.35	1.97663	0.000134401	0.00122137	68.2	495.34	2.87029	2.35101e-15	4.19299e-13		-0.89366
Unigene22772_All	804	0	37.22	6.42287	6.99112e-06	9.48914e-05	0	58.05	7.31754	6.29141e-08	1.89116e-06		-0.894673
CL10265.Contig3_All	3249	1.49	27.21	3.1396	0.000335256	0.00266615	1.03	22.5	4.11037	1.65616e-05	0.00023033		-0.970771
CL14794.Contig6_All	1309	24.4	127.98	1.58076	0.00226312	0.013312	23.54	154.71	2.56297	2.27426e-06	4.17875e-05		-0.98221
Unigene19171_All	1525	11.89	58.06	1.5623	0.00577932	0.028727	8.92	62.8	2.68697	3.36926e-05	0.000422195		-1.12467
CL21220.Contig36_All	5207	4.88	74	2.99394	2.25283e-05	0.000262937	3.56	69.87	4.19617	2.59658e-09	1.16156e-07		-1.20222
Unigene22534_All	1678	0	72.18	6.98454	8.8969e-07	1.55811e-05	0	134.01	8.22131	3.91477e-10	2.18919e-08		-1.23677
CL19978.Contig7_All	5134	213.94	768.91	1.13858	0.00341313	0.0186812	114.84	661.59	2.48133	3.45076e-08	1.11857e-06		-1.34275
Unigene51451_All	2567	19.69	243.62	2.89042	7.69807e-05	0.00075883	5.33	119.66	4.28706	1.38666e-08	5.07456e-07		-1.39664
CL10265.Contig9_All	2643	1.21	30.82	3.53503	0.000380262	0.00296194	0	14.95	5.83263	5.94799e-05	0.000686998		-2.2976

## Sheet: per
		TTS-VS-TTR					UTS-VS-UTR						E-J
Unigene	Length	TTS-Expression	TTR-Expression	log2FoldChange(TTR/TTS)	Pvalue	Padj	UTS-Expression	UTR-Expression	log2FoldChange(UTR/UTS)	Pvalue	Padj
CL992.Contig4_All	1233	0	255.73	8.82305	3.84207e-12	2.31333e-10	3.69	159.31	5.22448	9.3168e-08	2.66901e-06		3.59857
CL16812.Contig105_All	1258	0.3	28.51	4.92567	2.59074e-05	0.00029646	4.18	18.95	2.07193	0.00529519	0.0286477		2.85374
Unigene13953_All	1816	1.38	92.25	4.64616	1.23784e-06	2.08082e-05	8.56	46	2.26205	0.00217487	0.0138145		2.38411
Unigene11961_All	1982	0	31.57	5.96674	6.22259e-05	0.000631283	1.08	16.34	3.69208	0.000164121	0.00161155		2.27466
Unigene10491_All	1375	0	24.45	5.86391	7.08064e-05	0.000705918	0.37	10.21	4.01275	0.00160656	0.0107827		1.85116
CL7236.Contig3_All	1190	0	20.68	5.69235	0.000130327	0.00118982	0.34	8.83	3.95827	0.0020729	0.0132784		1.73408
CL3476.Contig27_All	3664	0	33.04	6.21054	2.05809e-05	0.00024285	0	9.9	4.67545	0.00423335	0.0238574		1.53509
CL3131.Contig12_All	1493	0	275.78	8.93507	1.75321e-12	1.12042e-10	1.08	262.43	7.5758	6.45052e-21	2.88485e-18		1.35927
CL17238.Contig4_All	1263	0	16.32	5.35471	0.000442362	0.00337059	0.34	10.61	4.14694	0.000824249	0.00619489		1.20777
Unigene33011_All	1024	0.28	37.76	5.30344	6.78778e-06	9.25003e-05	0.34	13.07	4.12878	0.00171073	0.0113385		1.17466
Unigene31414_All	1939	0	44.11	6.65801	2.59332e-06	3.97851e-05	0	13.99	5.54001	0.000264027	0.00239887		1.118
CL20825.Contig4_All	2138	3.28	117.78	4.23491	2.89392e-13	2.13746e-11	7.44	72.54	3.20202	1.63692e-08	5.84948e-07		1.03288
Unigene36677_All	1385	0	22.8	5.86896	6.41472e-05	0.000647972	0.96	43.91	4.8403	1.53865e-06	2.98495e-05		1.02866
CL21243.Contig2_All	2332	0.83	98.1	5.55236	8.33967e-11	3.86014e-09	3.1	77.5	4.55877	6.46532e-13	7.12026e-11		0.993593
CL15059.Contig2_All	1214	0	23.17	5.84998	6.91316e-05	0.00069114	0	8.51	4.92216	0.00142242	0.0097412		0.927821
CL3131.Contig10_All	1497	0	242.8	8.76733	6.89434e-12	3.94585e-10	0.64	249.86	7.86397	4.6878e-19	1.54977e-16		0.903364
CL4472.Contig8_All	1165	3.53	50.21	3.04831	0.000155124	0.00137942	2.75	13.03	2.18962	0.0104615	0.049591		0.858688
CL1417.Contig3_All	1490	0	20.47	5.71336	0.000118898	0.00110097	0.96	43.77	4.88481	5.24753e-07	1.18197e-05		0.82855
Unigene24151_All	3579	0	25.66	5.18797	0.00127467	0.00824875	0	7.92	4.4586	0.00646278	0.0336772		0.729372
CL12367.Contig1_All	1598	0	14.14	5.25555	0.000575539	0.0042145	0	6.26	4.58861	0.00356647	0.0207338		0.666943
CL20627.Contig4_All	1105	0.94	30.3	3.96689	1.49106e-05	0.000183038	1.7	19.66	3.30477	7.54863e-05	0.000839409		0.662123
CL6767.Contig2_All	1239	0	11.4	5.00395	0.00122607	0.00797741	0.74	21.27	4.45034	8.13246e-05	0.000893283		0.553617
CL15569.Contig1_All	889	1.18	30.67	3.65069	2.56912e-05	0.000294269	2.41	21.68	3.10099	6.33156e-05	0.000724509		0.549698
CL6388.Contig4_All	1169	1.24	44.9	3.99426	5.31522e-05	0.000552116	1.43	28.72	3.50026	0.00889132	0.0435988		0.493999
CL6134.Contig10_All	1126	0	29.06	6.14559	2.09316e-05	0.000246493	0	13.54	5.65719	0.000117966	0.00122267		0.4884
Unigene9482_All	1191	0	10.84	4.88463	0.00174818	0.0107312	0	7.88	4.40501	0.00657029	0.0341244		0.47962
Unigene5974_All	752	2.21	53.97	3.61614	2.74846e-05	0.000311867	4.18	37.52	3.17119	6.89978e-05	0.000779057		0.444947
CL1384.Contig8_All	1003	46.75	516.66	2.7283	2.30728e-10	9.7159e-09	76.07	402.88	2.49159	2.91125e-14	4.23605e-12		0.236715
CL3476.Contig41_All	2569	0	121.94	7.89956	2.48157e-09	8.28298e-08	0	76.97	7.71596	5.8152e-09	2.3747e-07		0.183599
CL477.Contig15_All	1833	0	19.68	5.61874	0.000167091	0.0014717	0	12.52	5.44212	0.000274609	0.00247739		0.176623
CL3042.Contig6_All	915	0	16.78	5.43248	0.000319594	0.00255798	0	12.29	5.25636	0.000551358	0.00443442		0.176115
CL11341.Contig5_All	1336	3.53	41.66	2.72572	0.00240305	0.0139933	6.23	41.46	2.57318	0.000206073	0.00195152		0.152539
Unigene35985_All	1290	0	84.71	7.45292	3.59487e-08	9.16481e-07	0	60.5	7.30292	7.75974e-08	2.27623e-06		0.150004
CL8033.Contig8_All	1195	2.1	28.58	2.83065	0.00183812	0.0111915	3.84	24.66	2.72389	0.000818929	0.0061599		0.106758
Unigene6564_All	1654	0.3	106.03	6.76921	1.87902e-10	8.1026e-09	0.66	112.17	6.73379	5.01057e-13	5.67141e-11		0.0354265
CL488.Contig52_All	1886	2.65	33.07	2.78758	0.010603	0.0469969	3.29	21.77	2.76752	0.00636715	0.0332694		0.0200624
CL3131.Contig11_All	1539	0	18.1	5.40569	0.00045064	0.00342314	0	13.76	5.39388	0.000351484	0.00304543		0.0118177
CL21248.Contig1_All	1038	0.28	45.86	5.4783	4.11831e-06	5.96833e-05	0.68	41.9	5.46956	1.30023e-08	4.80116e-07		0.00873757
Unigene36078_All	1297	0	16.14	5.44005	0.00030254	0.00243927	0	11.76	5.44381	0.000295608	0.00263486		-0.0037588
CL3042.Contig8_All	898	0	14.22	5.07313	0.00113156	0.00745145	0	10.44	5.08793	0.000909539	0.00670999		-0.0147942
CL20825.Contig3_All	1487	6.89	176.22	3.73918	1.99142e-10	8.5339e-09	9.42	148.07	3.76746	1.71247e-10	1.0434e-08		-0.0282726
CL19784.Contig23_All	855	0.28	44.62	5.52366	1.21483e-06	2.04724e-05	0.66	46.27	5.57993	5.46601e-09	2.25036e-07		-0.056277
Unigene25643_All	1945	0.61	36.14	4.6011	6.04806e-06	8.35741e-05	0.34	17.86	4.68329	0.000133039	0.00135248		-0.0821915
Unigene34493_All	1545	2.73	48.04	3.26051	1.32478e-06	2.20443e-05	2.05	29.77	3.3639	0.00204086	0.0131113		-0.103387
CL9139.Contig5_All	2065	18.33	138.69	2.10357	6.07848e-07	1.11735e-05	20.41	103.31	2.20931	5.4817e-05	0.00064019		-0.105737
CL20265.Contig13_All	2362	3.69	30.76	2.15138	0.00519211	0.0263675	4.44	21.85	2.28657	0.00230144	0.0144724		-0.135191
CL3401.Contig4_All	1075	20.34	537.2	3.80029	5.20193e-15	5.21482e-13	27.62	489.09	3.93603	4.78498e-12	4.26696e-10		-0.13574
Unigene48713_All	1533	0.3	14.98	4.01222	0.00141433	0.008986	0	4.87	4.17795	0.010138	0.0483323		-0.165729
CL3476.Contig80_All	2789	0	84.12	7.47537	2.85728e-08	7.45175e-07	0	71.26	7.67265	5.92181e-09	2.40986e-07		-0.197279
CL18514.Contig18_All	2667	7.09	121.5	3.03168	0.00064056	0.00460684	5.54	64.33	3.23197	0.0074311	0.037742		-0.200289
CL10425.Contig10_All	1028	2.37	31.29	2.66974	0.00123091	0.00800371	2.35	22.29	2.87086	0.00293422	0.0176486		-0.201114
Unigene34525_All	2526	6.62	110.87	3.13065	2.82337e-07	5.70364e-06	5.87	69.02	3.37003	4.0481e-07	9.43778e-06		-0.239376
CL20265.Contig5_All	2225	0.61	44.55	4.89705	8.41575e-07	1.48627e-05	0.37	24.81	5.16124	1.52545e-05	0.000214916		-0.264191
CL21201.Contig16_All	1075	1.74	24.12	2.67231	0.00778924	0.0367026	2.48	25.27	3.00396	0.00258778	0.0159158		-0.331651
CL20762.Contig13_All	1082	0	6.86	4.21518	0.0100937	0.045244	0	5.8	4.56639	0.00370342	0.021386		-0.351211
Unigene8091_All	914	0	57.43	7.0047	4.20559e-07	8.09087e-06	0	52.17	7.35879	4.3349e-08	1.36206e-06		-0.354093
Unigene21939_All	1956	3.7	77.22	3.52583	7.01748e-09	2.1083e-07	2.13	36.24	3.9214	1.35975e-06	2.68609e-05		-0.395562
CL18514.Contig8_All	2844	0	49.78	6.77336	1.2903e-06	2.15665e-05	0	46.61	7.19458	9.19899e-08	2.64093e-06		-0.421219
CL946.Contig12_All	1897	1.27	45.18	4.21318	6.99859e-07	1.26507e-05	1.05	33.52	4.65114	2.94243e-07	7.16231e-06		-0.437959
CL21286.Contig37_All	1061	0	35.91	6.29967	1.28444e-05	0.000160533	0	36.67	6.82411	7.20877e-07	1.55419e-05		-0.524442
Unigene20007_All	1999	0.33	133.85	7.01506	4.30271e-11	2.10335e-09	0	69.2	7.61446	9.22274e-09	3.55451e-07		-0.599401
CL10970.Contig1_All	1385	2.7	47.59	3.20643	1.23954e-06	2.08329e-05	1.82	31.53	3.8074	0.000105113	0.00110915		-0.600965
CL19657.Contig2_All	1328	1.49	17.9	2.59637	0.00278841	0.0158323	1.31	17.43	3.30468	0.00805874	0.040251		-0.708312
Unigene20003_All	901	69.32	655.32	2.39495	2.84163e-07	5.73591e-06	54.46	502.11	3.24419	3.67728e-14	5.24669e-12		-0.849241
Unigene17433_All	1246	1.82	23.72	2.5848	0.0113977	0.0497965	0.74	11.67	3.44894	0.00520228	0.028263		-0.864136
CL8838.Contig2_All	1436	0.61	16.2	3.56276	0.000820632	0.00568036	0.34	13.38	4.46297	0.000221518	0.00207248		-0.900212
CL6134.Contig5_All	1329	0.3	14.19	4.04207	0.00104561	0.0069729	0	8.82	4.94558	0.00136559	0.00941824		-0.903512
CL20265.Contig11_All	2211	0.3	74.46	6.16371	3.28303e-08	8.45805e-07	0	42.51	7.13219	1.39551e-07	3.76686e-06		-0.968483
CL6563.Contig2_All	1084	1.82	830	7.68465	1.27665e-22	3.67606e-20	0.69	522.03	8.70101	3.98268e-19	1.32662e-16		-1.01636
Unigene15868_All	627	0.3	9.63	3.50333	0.00846379	0.0392141	0	8.68	4.525	0.00539218	0.0290769		-1.02167
CL3508.Contig2_All	1467	1.66	31.79	3.36949	0.000610984	0.00442925	2.86	72.08	4.58419	1.57427e-07	4.17769e-06		-1.2147
Unigene21226_All	1589	0.66	28.69	4.3399	2.20743e-05	0.000258167	0.37	29.86	5.57189	7.29083e-07	1.56997e-05		-1.232
Unigene33256_All	1533	17.42	156.41	2.35665	9.88361e-08	2.24569e-06	7.55	106.38	3.70535	5.85329e-11	4.02574e-09		-1.3487
CL21332.Contig35_All	2021	24.26	231.02	2.43297	1.41624e-08	3.96889e-07	10.01	151.76	3.79859	1.33521e-10	8.3907e-09		-1.36562
CL21409.Contig15_All	847	0.83	24.5	3.57894	0.000426681	0.00327023	0.37	18.52	4.95113	2.69249e-05	0.000349057		-1.37219
Unigene34818_All	2578	7.28	115.93	3.19893	2.40392e-06	3.72038e-05	2.58	77.2	4.60647	1.66899e-06	3.2029e-05		-1.40754
CL1076.Contig3_All	1715	0	31.79	6.06279	3.80998e-05	0.000414206	0	74.37	7.51658	2.48952e-08	8.44089e-07		-1.45379
Unigene18257_All	1583	1.24	65.13	4.63793	4.66999e-08	1.15867e-06	0.37	53.72	6.23528	2.72328e-08	9.12116e-07		-1.59735
CL19386.Contig17_All	816	0.3	14.49	4.07303	0.00101233	0.00678233	0	14.89	5.80681	6.92139e-05	0.000780997		-1.73378
Unigene31485_All	3815	0.61	55.7	4.49849	0.00204564	0.0122386	0	58.83	6.32185	3.41655e-05	0.000427209		-1.82336
CL12585.Contig2_All	1497	8.66	100.07	2.65784	9.16804e-05	0.000881458	5.47	146.67	4.4886	3.33507e-11	2.43743e-09		-1.83076
Unigene12885_All	3582	0.61	79.12	5.71197	2.30137e-09	7.72339e-08	0	77.77	7.5431	2.52581e-08	8.54584e-07		-1.83113
CL6981.Contig3_All	1263	2.73	62.77	3.35249	0.00185137	0.0112593	0.68	36.9	5.23324	1.72355e-07	4.52341e-06		-1.88075
CL8066.Contig7_All	991	0.63	15.56	3.52864	0.00142415	0.00903788	0	14.13	5.66297	0.000136767	0.00138257		-2.13433
Unigene21674_All	1834	0.61	89.1	5.8969	2.34544e-10	9.85069e-09	0	127.65	8.36653	8.0082e-11	5.31892e-09		-2.46962
Unigene9415_All	1667	1.13	22.8	3.19073	0.000612807	0.00443954	0	14.55	5.76852	7.48754e-05	0.000833747		-2.57778
CL1417.Contig6_All	1680	16.33	141.5	2.36813	0.000287637	0.00233743	11.44	945.65	5.8186	1.04303e-12	1.08751e-10		-3.45047
Unigene22563_All	1200	3.96	75.04	2.99723	0.00202926	0.0121564	0	36.12	6.66798	1.92505e-06	3.62287e-05		-3.67074

## Sheet: mon
		TTS-VS-TTR					UTS-VS-UTR						E-J
Unigene	Length	TTS-Expression	TTR-Expression	log2FoldChange(TTR/TTS)	Pvalue	Padj	UTS-Expression	UTR-Expression	log2FoldChange(UTR/UTS)	Pvalue	Padj
CL2133.Contig4_All	1909	0	87.23	7.41799	5.64343e-08	1.36798e-06	1.65	36.49	4.19043	2.85267e-07	6.97756e-06		3.22756
CL4070.Contig3_All	1972	0	45.6	6.71171	1.65651e-06	2.67694e-05	0.64	22.61	4.57108	7.47263e-06	0.000116215		2.14062
CL20016.Contig13_All	2456	0	12.41	4.4387	0.00749191	0.0355318	3.25	27.81	2.78457	0.00288704	0.0174183		1.65413
CL20016.Contig1_All	2231	0	43.22	6.5863	4.32834e-06	6.23369e-05	0	28.65	5.33385	0.000829564	0.00622793		1.25245
CL20016.Contig10_All	2577	6.78	65.94	2.35009	0.00680899	0.0328409	21.42	62.71	1.53637	0.0100481	0.0479877		0.813717
CL13190.Contig4_All	1988	0	130.59	8.00449	1.16871e-09	4.19969e-08	0	67.85	7.23686	1.67689e-07	4.41611e-06		0.767623
CL353.Contig78_All	1681	27.93	367.96	2.77449	9.06899e-06	0.000118849	22.54	89.43	2.04654	0.000171447	0.00167157		0.727955
CL19928.Contig14_All	1951	11.23	205.03	2.96551	0.00187494	0.0113826	26.38	117.84	2.25382	1.07537e-05	0.000159261		0.711689
CL20016.Contig25_All	1942	0	81.4	7.34568	7.2172e-08	1.69459e-06	0	55.45	6.65515	4.86361e-06	8.02065e-05		0.690525
CL771.Contig16_All	2275	10.27	692.95	4.83973	5.03283e-10	1.95853e-08	15.61	408.38	4.17539	5.59058e-07	1.24839e-05		0.664335
Unigene55299_All	1393	0.63	14.39	3.36964	0.00218374	0.0129163	3.11	21.47	2.78725	0.00215348	0.0137033		0.582387
Unigene55461_All	2180	9.76	113.01	2.68384	3.21356e-07	6.39206e-06	16.55	88.01	2.33696	6.31742e-06	0.000100595		0.346886
CL20446.Contig2_All	1344	50.37	292.09	1.78705	2.93184e-07	5.90109e-06	57.8	160.68	1.51573	0.000185784	0.00178889		0.271321
CL4144.Contig7_All	1800	56.49	377.89	1.91712	2.55501e-05	0.000293036	101.71	303.51	1.64688	0.00164731	0.0110067		0.270234
CL20016.Contig20_All	2305	0	126.35	7.80874	6.79866e-09	2.05026e-07	0	70.81	7.55496	1.80924e-08	6.37605e-07		0.253781
Unigene16494_All	1460	2.65	57.57	3.43156	0.00193981	0.0117114	7.93	74.24	3.18415	0.000102414	0.00108535		0.247409
CL15061.Contig3_All	1453	17.37	84.35	1.50621	0.00230391	0.013514	22.16	51.8	1.3131	0.00821974	0.0408859		0.193104
CL4070.Contig2_All	2031	24.62	151.47	1.81784	1.32844e-06	2.20969e-05	30.18	101.98	1.66482	0.00102558	0.00740973		0.153029
Unigene55460_All	2327	17.62	79.84	1.37761	0.00678783	0.0327676	27.62	66.54	1.29391	0.00758007	0.0383416		0.0837059
CL4144.Contig6_All	1725	53.67	395.14	2.02821	3.83717e-06	5.6122e-05	86.58	338.69	2.04074	1.0858e-05	0.00016059		-0.0125391
CL7110.Contig9_All	1794	0	76.24	7.35507	6.15583e-08	1.47405e-06	0	57.95	7.47041	2.92832e-08	9.68819e-07		-0.115342
CL20016.Contig6_All	2468	0	54.6	6.92057	6.27022e-07	1.14844e-05	0	43.73	7.07171	2.39778e-07	6.02205e-06		-0.151134
Unigene55465_All	2117	16.51	97.39	1.76603	9.61229e-06	0.000125029	20.09	77.54	1.94416	1.39191e-05	0.000199031		-0.178127
CL2133.Contig13_All	1831	20.39	180.36	2.24649	7.49323e-06	0.000100693	22.95	128.96	2.43127	5.55184e-07	1.241e-05		-0.184785
CL20016.Contig7_All	2490	0	18.2	5.54685	0.000234922	0.00196684	0	18.66	5.84799	6.90052e-05	0.000779091		-0.301145
Unigene33113_All	1708	11.9	164.91	2.71039	0.00391935	0.0209456	8.02	79.63	3.02909	0.00403608	0.0229698		-0.318698
CL3457.Contig3_All	1593	0.28	32.96	5.06666	3.48147e-05	0.000383077	0	18.53	5.472	0.000489304	0.00401781		-0.405332
CL2417.Contig4_All	2501	0.3	17.7	4.28616	0.000595498	0.00433467	0	7.88	4.71961	0.00267556	0.0163637		-0.433453
CL20016.Contig19_All	2332	0	11.57	4.96994	0.00137994	0.00880372	0	13.53	5.47997	0.000241991	0.00223239		-0.510037
CL3457.Contig2_All	1000	0.28	18.66	4.3323	0.000428492	0.0032819	0	8.86	4.97078	0.00152627	0.0103263		-0.638483
CL20016.Contig33_All	2390	0	82.92	6.88287	2.343e-06	3.6402e-05	0	72.21	7.75082	3.78135e-09	1.62712e-07		-0.867944
Unigene6863_All	1903	0.88	16.34	3.11461	0.00232413	0.0136117	2.36	41.51	4.01587	2.39553e-06	4.37739e-05		-0.901254
CL17833.Contig4_All	1770	3.12	115.45	4.0465	0.000372546	0.00291151	1.03	52.95	4.95606	0.000100714	0.00106971		-0.909556
Unigene43902_All	1786	6.81	49.56	2.06476	0.000154536	0.00137495	3.08	32.18	3.22811	6.62746e-06	0.000104906		-1.16335
CL9534.Contig6_All	982	0.28	27.52	4.8892	3.75076e-05	0.000408575	0	18.89	6.10941	1.85415e-05	0.000253662		-1.22021
CL6469.Contig8_All	2336	129.3	487.1	1.20772	0.00121853	0.00793654	87.9	695.81	3.06698	6.08997e-08	1.83782e-06		-1.85925
CL2133.Contig1_All	1784	0.61	71.13	5.42042	1.54141e-07	3.32992e-06	0	65.71	7.46271	3.31927e-08	1.08051e-06		-2.04229
CL2417.Contig11_All	2465	1.38	56.44	4.03315	2.02414e-05	0.00023947	0	37.31	6.89494	4.67461e-07	1.06753e-05		-2.86179
CL2659.Contig2_All	2067	1.66	139.22	5.33983	6.99688e-07	1.26503e-05	0	372.02	9.41667	5.7185e-13	6.35338e-11		-4.07685
CL2156.Contig1_All	1797	9.12	117.31	2.51119	0.00804948	0.0376505	0	95.98	7.99683	8.88139e-10	4.51e-08		-5.48564
