# Supplementary material
Source: MDPI journal article supplement (https://www.mdpi.com/2073-4395/12/12/2998)
Supplement: s1 [file s1 › Supplemental Table S7.xlsx]

## Sheet: ABC
		TSS-VS-TSR					USS-VS-USR					TTS-VS-TTR					UTS-VS-UTR						E-J		O-T
Unigene	Length	TSS-Expression	TSR-Expression	log2FoldChange(TSR/TSS)	Pvalue	Padj	USS-Expression	USR-Expression	log2FoldChange(USR/USS)	Pvalue	Padj	TTS-Expression	TTR-Expression	log2FoldChange(TTR/TTS)	Pvalue	Padj	UTS-Expression	UTR-Expression	log2FoldChange(UTR/UTS)	Pvalue	Padj
CL10265.Contig3_All	3249	2.39	21.81	2.94156	0.000188397	0.00150856	6.59	19.43	2.12077	0.000926277	0.00596258	1.49	27.21	3.1396	0.000335256	0.00266615	1.03	22.5	4.11037	1.65616e-05	0.00023033		0.820783		-0.970771
CL10265.Contig9_All	2643	0	25.4	6.22354	3.42e-06	4.64e-05	2.34	22.79	3.65141	6.85708e-06	8.82768e-05	1.21	30.82	3.53503	0.000380262	0.00296194	0	14.95	5.83263	5.94799e-05	0.000686998		2.57213		-2.2976
CL10624.Contig5_All	3256	2.7	37.73	3.46286	5.17e-06	6.67e-05	8.69	30.07	2.26323	0.000115088	0.00101509	1.9	44.56	3.63475	3.49739e-06	5.16983e-05	2.39	30.89	3.5675	5.83431e-07	1.29461e-05		1.19963		0.0672574
CL14794.Contig6_All	1309	36.82	178.17	2.09305	5.81e-07	9.75e-06	22.39	97.84	2.7335	5.03506e-06	6.74444e-05	24.4	127.98	1.58076	0.00226312	0.013312	23.54	154.71	2.56297	2.27426e-06	4.17875e-05		-0.640456		-0.98221
CL16515.Contig2_All	3342	0	28.75	6.33466	2.11e-06	3.04e-05	0	26.96	6.74263	1.96384e-07	3.94153e-06	0	28.51	6.0789	2.88319e-05	0.000325246	0	30.44	6.63383	1.88365e-06	3.55826e-05		-0.407966		-0.554925
CL21220.Contig36_All	5207	10.51	54.03	2.25811	0.000111888	0.000963026	10.89	37.54	2.32692	6.75966e-05	0.000643395	4.88	74	2.99394	2.25283e-05	0.000262937	3.56	69.87	4.19617	2.59658e-09	1.16156e-07		-0.0688122		-1.20222
CL21332.Contig7_All	1362	3.18	25.11	2.80888	0.000231703	0.00179988	1.52	19.86	4.00188	4.0296e-06	5.5597e-05	1.54	42.83	3.83929	1.43224e-06	2.35519e-05	3.84	27.51	2.78624	0.000172208	0.00167741		-1.193		1.05305
CL5608.Contig2_All	2629	0.88	187.16	6.94827	5.29e-20	9.37e-18	1.23	148.53	7.17785	1.38507e-21	3.45063e-19	0	279.93	8.9416	1.50544e-12	9.70536e-11	0	182.04	8.91911	7.32323e-13	7.93611e-11		-0.229574		0.0224868
CL5608.Contig4_All	2674	0	59.24	7.30368	7.01e-09	1.91e-07	0	41.24	7.24645	9.77423e-09	2.77279e-07	0	49.66	6.80492	1.07684e-06	1.83901e-05	0	63.59	7.43481	3.07262e-08	1.01162e-06		0.0572273		-0.629889
Unigene15188_All	3616	46.71	163.68	1.64575	4.05e-06	5.37e-05	127.61	169.16	1.0065	5.91896e-05	0.000574748	21.23	240.84	2.73581	2.76819e-12	1.70765e-10	20.62	142.82	2.49711	0.0024083	0.0150153		0.639245		0.238697
Unigene22534_All	1678	0	112.95	8.01872	6.88e-11	2.89e-09	0	58.36	7.65878	8.87911e-10	3.2842e-08	0	72.18	6.98454	8.8969e-07	1.55811e-05	0	134.01	8.22131	3.91477e-10	2.18919e-08		0.359936		-1.23677
Unigene22772_All	804	0.34	60.66	6.27768	4.22e-09	1.21e-07	0	33.02	6.942	8.9486e-08	1.97097e-06	0	37.22	6.42287	6.99112e-06	9.48914e-05	0	58.05	7.31754	6.29141e-08	1.89116e-06		-0.66432		-0.894673
Unigene24722_All	1378	1.34	374.34	7.60809	1.36e-28	6.2e-26	1.87	238.22	7.2403	2.83162e-26	1.18089e-23	1.19	279.59	6.58369	1.5337e-14	1.41422e-12	2.06	326.51	6.94584	3.96418e-22	2.0247e-19		0.367782		-0.362149
Unigene27801_All	1443	1	112.64	6.25649	8.01e-16	8.04e-14	3.01	75.41	5.03367	1.21537e-13	9.72084e-12	0.55	69.62	5.49373	3.82379e-08	9.67551e-07	1.37	107.93	5.82809	1.53969e-11	1.2188e-09		1.22283		-0.334351
Unigene35479_All	4703	41.38	380.11	3.0755	4.81e-21	9.77e-19	71.05	242.24	2.35298	1.11631e-17	1.6638e-15	67.87	505.35	1.97663	0.000134401	0.00122137	68.2	495.34	2.87029	2.35101e-15	4.19299e-13		0.722526		-0.89366
Unigene51448_All	894	1.03	20.25	3.82543	5.39e-05	0.000512937	0.41	13.84	4.8686	1.83507e-05	0.000208081	1.32	45.32	4.12213	0.000104245	0.000984456	1.01	35.88	4.74635	4.14771e-07	9.63941e-06		-1.04317		-0.624218
Unigene51450_All	2521	32.26	143.84	2.10801	4.82e-05	0.000465775	17.96	127.31	3.29518	3.88749e-08	9.414e-07	30.33	467.32	3.1709	2.94177e-08	7.6517e-07	14.07	209.76	3.83037	1.94689e-08	6.78649e-07		-1.18717		-0.659473
Unigene51451_All	2567	12.22	98.32	2.90195	3.04e-07	5.49e-06	7.81	68.22	3.58995	6.83471e-09	2.01667e-07	19.69	243.62	2.89042	7.69807e-05	0.00075883	5.33	119.66	4.28706	1.38666e-08	5.07456e-07		-0.688003		-1.39664
Log2>0
		TSS-VS-TSR					USS-VS-USR					TTS-VS-TTR					UTS-VS-UTR						E-J		O-T
Unigene	Length	TSS-Expression	TSR-Expression	log2FoldChange(TSR/TSS)	Pvalue	Padj	USS-Expression	USR-Expression	log2FoldChange(USR/USS)	Pvalue	Padj	TTS-Expression	TTR-Expression	log2FoldChange(TTR/TTS)	Pvalue	Padj	UTS-Expression	UTR-Expression	log2FoldChange(UTR/UTS)	Pvalue	Padj
CL10624.Contig5_All	3256	2.7	37.73	3.46286	5.17e-06	6.67e-05	8.69	30.07	2.26323	0.000115088	0.00101509	1.9	44.56	3.63475	3.49739e-06	5.16983e-05	2.39	30.89	3.5675	5.83431e-07	1.29461e-05		1.19963		0.0672574
Unigene15188_All	3616	46.71	163.68	1.64575	4.05e-06	5.37e-05	127.61	169.16	1.0065	5.91896e-05	0.000574748	21.23	240.84	2.73581	2.76819e-12	1.70765e-10	20.62	142.82	2.49711	0.0024083	0.0150153		0.639245		0.238697

## Sheet: est
		TSS-VS-TSR					USS-VS-USR					TTS-VS-TTR					UTS-VS-UTR						E-J		O-T
Unigene	Length	TSS-Expression	TSR-Expression	log2FoldChange(TSR/TSS)	Pvalue	Padj	USS-Expression	USR-Expression	log2FoldChange(USR/USS)	Pvalue	Padj	TTS-Expression	TTR-Expression	log2FoldChange(TTR/TTS)	Pvalue	Padj	UTS-Expression	UTR-Expression	log2FoldChange(UTR/UTS)	Pvalue	Padj
CL12179.Contig5_All	1518	0.98	38.22	4.70998	1.02e-07	2.09e-06	0	12.02	5.53949	9.80603e-05	0.000885818	5.05	55.69	2.57711	0.0024253	0.0141024	2.69	68.51	4.51759	4.54353e-11	3.21677e-09		-0.82951		-1.94048
CL12449.Contig1_All	942	0	18.11	5.73346	3.61e-05	0.000362589	0	9.25	5.36153	0.000145246	0.00123952	1.49	21.82	2.84178	0.00205657	0.0122897	0	15.32	5.74471	8.51408e-05	0.000928308		0.371935		-2.90293
CL14540.Contig21_All	918	0.29	21.77	4.95388	1.22e-05	0.000141532	2.63	14.44	2.85579	0.000359499	0.00268223	0.33	33.21	5.20771	4.89369e-06	6.9506e-05	0.32	22.01	5.10377	1.6756e-05	0.000232685		2.09808		0.103935
CL15167.Contig2_All	2857	0	31.15	6.47054	1.04e-06	1.63e-05	0	12.41	5.72461	3.32812e-05	0.000348961	1.74	55.2	3.85857	1.60468e-06	2.60273e-05	0	28.08	6.55114	2.65318e-06	4.78224e-05		0.74593		-2.69257
CL15584.Contig1_All	1437	7.5	39.3	2.22307	7.54e-05	0.000685637	0.76	40.62	5.73283	3.73447e-10	1.50363e-08	3.94	67.95	3.25925	1.21232e-07	2.69408e-06	1.01	43.24	5.09631	4.80897e-08	1.4945e-06		-3.50976		-1.83706
CL1626.Contig2_All	2722	0.34	29.2	5.37796	9.81e-07	1.55e-05	3.1	23.84	3.40556	8.6607e-06	0.000108118	9.1	149.46	3.24145	8.30075e-05	0.000809575	5.65	188.33	4.9565	1.07148e-07	3.0069e-06		1.9724		-1.71505
CL18882.Contig18_All	1385	3.14	26.4	2.83208	0.000342538	0.00252212	0	15.14	5.99643	9.74761e-06	0.000119862	0.61	24.75	4.1367	7.90075e-05	0.000775594	0.34	17.11	4.70106	0.000110463	0.00115701		-3.16435		-0.564361
CL19740.Contig11_All	1299	0.68	21.52	4.25023	6.36e-05	0.000592194	0.76	7.38	3.35231	0.00261182	0.0142648	1.19	18.02	2.83084	0.00356859	0.0193682	1.4	14.95	3.20381	0.00094114	0.00690467		0.897924		-0.372967
CL20263.Contig3_All	1559	143.16	675.94	2.14325	3.11e-12	1.72e-10	136.51	554.03	2.64553	1.37164e-06	2.17264e-05	209.84	816.24	1.18512	0.000842215	0.00580667	77.4	1107.49	3.64947	8.29619e-10	4.24958e-08		-0.502278		-2.46435
CL20265.Contig14_All	2230	2.86	47.61	3.667	3.07e-07	5.54e-06	4.89	31.7	3.16879	1.95371e-07	3.92257e-06	4.88	67.21	2.86811	6.43616e-06	8.82852e-05	1.33	36.54	4.37046	6.91365e-07	1.49974e-05		0.498207		-1.50234
CL20415.Contig5_All	1646	7.04	67.29	3.05499	0.00124923	0.0075591	17.39	49.65	2.129	0.000120832	0.00105895	6.59	155.27	3.66994	8.79522e-14	7.17984e-12	8.84	42.53	2.04862	0.00503326	0.0274948		0.92599		1.62132
CL2541.Contig7_All	1530	0	91.97	7.74773	6.93e-10	2.36e-08	0	54.86	7.5745	1.76707e-09	6.04188e-08	1.82	396.96	6.7452	4.44763e-25	1.61339e-22	1.11	243.63	7.42762	4.43274e-16	9.04033e-14		0.173231		-0.682412
CL3838.Contig15_All	1359	1.02	83.84	5.8166	1.53e-12	8.91e-11	0.7	65.8	6.43082	1.63363e-13	1.27392e-11	0.55	152.59	6.60983	2.8226e-13	2.0918e-11	2.89	110.28	4.66503	4.28072e-06	7.18173e-05		-0.614218		1.94481
CL3838.Contig18_All	1376	23.38	102.76	2.00839	1.33e-07	2.64e-06	29.21	65.01	1.75166	1.64344e-06	2.53979e-05	30.91	191.51	1.8385	2.4182e-07	4.97715e-06	31.5	129.61	2.06228	1.07611e-07	3.01799e-06		0.256733		-0.223781
CL4035.Contig10_All	1525	83.46	1592.01	4.15073	3.01e-24	8.8e-22	85.6	1353.46	4.55636	1.57565e-15	1.718e-13	235.67	2043.81	2.30587	1.43717e-07	3.12738e-06	78.69	3268.26	5.15974	2.99516e-16	6.32062e-14		-0.405629		-2.85387
CL4035.Contig13_All	1547	3.6	409.77	6.52246	1.03e-38	1.15e-35	2.75	363.36	7.36953	1.72721e-24	5.92094e-22	1.32	363.42	7.10074	4.42851e-21	1.03884e-18	1.61	583.07	7.72792	1.24616e-18	3.85233e-16		-0.847071		-0.627186
CL5709.Contig9_All	2487	7.39	92.56	3.48793	9.05e-06	0.000108657	6.09	71.52	4.03036	4.25722e-09	1.32335e-07	52.12	291.09	1.77428	0.0102327	0.045696	17.57	528.39	4.90514	1.87157e-10	1.12786e-08		-0.542422		-3.13085
CL5834.Contig3_All	765	0	8.46	4.72194	0.00141179	0.00838682	0	5.68	4.61249	0.00193763	0.0111168	0	9.85	4.81897	0.00208501	0.012436	0	6.12	4.65232	0.00292586	0.0176091		0.109453		0.166658
CL6462.Contig6_All	1333	0	14.26	5.46443	0.000102341	0.000892256	1.9	17.04	3.40173	0.000765137	0.0050822	0.28	29.79	4.97061	1.88416e-05	0.000224784	0.32	10.44	4.06143	0.00115566	0.00818703		2.0627		0.909183
CL7620.Contig11_All	1436	12.61	125.58	3.16297	9.11e-07	1.45e-05	14.94	95.7	3.18291	3.45728e-09	1.09718e-07	17.14	134.01	2.03783	0.00035273	0.00278272	19.83	110.12	2.476	3.31899e-07	7.94825e-06		-0.0199432		-0.438169
CL7620.Contig14_All	1450	7.66	66.25	2.98011	3.13e-05	0.000320337	6.56	74.82	4.04831	8.13257e-12	4.65577e-10	9.5	74.78	1.93854	0.00841798	0.0390368	7.15	67.15	3.16401	1.49996e-07	4.01069e-06		-1.06819		-1.22547
CL7778.Contig4_All	2288	18.92	243.72	3.50338	1.44e-16	1.63e-14	18	181.48	3.90417	4.65167e-30	2.6936e-27	8.78	285.92	3.76297	4.59017e-05	0.000486547	11.61	176.36	3.7944	2.79731e-10	1.61928e-08		-0.400791		-0.0314252
CL92.Contig60_All	2181	1.7	90.64	5.31717	1.36e-11	6.61e-10	3.83	116.22	5.29589	4.51351e-17	6.17912e-15	2.26	96.42	4.18307	3.93652e-07	7.64343e-06	1.45	44.42	4.66118	9.86343e-08	2.80551e-06		0.0212772		-0.478112
CL9410.Contig2_All	976	0	22.62	5.93218	1.91e-05	0.00020889	0	9.91	5.34928	0.000171139	0.0014241	0	17.66	5.42427	0.000404768	0.00312707	0	29.58	6.09936	3.56863e-05	0.000443613		0.582899		-0.675094
Unigene16949_All	2524	0.59	12.47	3.50009	0.00165714	0.00959157	0.79	16.2	4.40283	2.16328e-05	0.000239762	0	34.45	6.30219	1.17461e-05	0.000148512	0	20.03	6.04056	2.71474e-05	0.00035145		-0.902743		0.261624
Unigene17336_All	2910	0	50.53	7.05056	4.19e-08	9.46e-07	0	34.39	6.99479	5.04092e-08	1.18343e-06	0	31.31	6.1555	2.2846e-05	0.00026594	0	16.66	5.96471	3.49138e-05	0.0004353		0.0557676		0.190785
Unigene18924_All	1195	0.37	71.12	6.61952	6.33e-11	2.68e-09	0.41	38.89	6.26119	4.01587e-09	1.25562e-07	0.3	96.14	6.58406	7.84329e-10	2.92044e-08	0.34	61.37	6.38252	1.06979e-08	4.04346e-07		0.358333		0.201538
Unigene19250_All	1687	10.81	205.76	3.96853	3.65e-10	1.32e-08	11.61	200.56	4.6111	4.63749e-26	1.88359e-23	3.08	147.98	4.3199	4.05298e-07	7.84002e-06	6.53	51.46	2.65252	0.00402931	0.0229372		-0.642566		1.66738
Unigene21319_All	1342	0	14	5.43968	0.000110441	0.000952311	0	12.3	5.56218	7.74091e-05	0.000721326	0.66	28.03	4.28753	3.41879e-05	0.000377082	1.05	11.06	2.97051	0.00720361	0.0367795		-0.12249		1.31701
Unigene25476_All	842	0	5.17	4.13311	0.00714311	0.0322581	0	9.33	5.29293	0.000202772	0.00164655	0	13.52	5.20054	0.000661936	0.00473386	0.34	7.74	3.61964	0.00570083	0.030421		-1.15983		1.58091
Unigene27121_All	3551	4.43	42.95	2.85054	0.00737236	0.033122	8.43	29.92	2.38946	0.000590533	0.0040781	4.24	58.88	2.83228	0.000388949	0.00302104	21.54	54.97	1.45301	0.00700917	0.0359566		0.461077		1.37927
Unigene29773_All	884	0	23.87	6.1173	6.28e-06	7.91e-05	0	28.24	6.79932	1.53556e-07	3.1768e-06	0	18.59	5.5163	0.000245261	0.00203855	0	22.2	6.14999	1.75992e-05	0.000242635		-0.682018		-0.633693
Unigene33083_All	1079	0.64	164.53	7.19767	8.06e-18	1.07e-15	0	132.63	8.75953	8.21815e-14	6.7852e-12	0.58	183.58	6.91543	9.1744e-15	8.75823e-13	0.34	114.55	7.44863	5.78929e-13	6.42392e-11		-1.56186		-0.533204
Unigene40381_All	2251	3.04	52.75	3.87244	1.01e-09	3.31e-08	6.85	38.44	2.94831	0.000102288	0.000918259	7.55	72.64	2.43349	1.88592e-05	0.000224979	5.15	46.85	2.91184	0.00108338	0.00775637		0.924129		-0.47835
Unigene48157_All	1199	0.64	28	4.4154	0.000250718	0.00192705	1.11	14.6	3.87813	6.37136e-05	0.000611697	0.28	34.43	5.20264	4.62278e-06	6.61011e-05	0.37	16.25	4.44064	0.000638264	0.00500834		0.537266		0.761999
Unigene51639_All	880	0.34	18.15	4.66825	9.59e-05	0.000843916	0.41	16.16	4.91297	6.9926e-05	0.000662144	1.16	30.6	3.59947	4.62021e-05	0.000489113	0	21.28	6.24948	1.02347e-05	0.000152627		-0.244726		-2.65
Unigene51640_All	898	0.74	26.96	4.5797	3.56e-05	0.000358268	0	15.94	5.96935	1.49455e-05	0.00017417	0.83	25.83	3.55182	0.000801902	0.00557044	0.34	23.58	5.1309	1.2803e-05	0.000185191		-1.38965		-1.57908
Unigene52358_All	869	0.37	95.13	6.99673	2.47e-12	1.39e-10	0.41	54.62	6.74061	4.95766e-11	2.42233e-09	0	110.38	7.80851	4.08921e-09	1.29698e-07	0	91.55	8.02919	5.40853e-10	2.92878e-08		0.256124		-0.220676
Unigene59585_All	628	0.37	29.55	5.4276	5.68e-07	9.56e-06	0	24.4	6.60728	4.80562e-07	8.6805e-06	0	53.42	6.84939	1.182e-06	1.99803e-05	0.32	27.85	5.31934	1.44215e-05	0.000205116		-1.17967		1.53005
Unigene7413_All	763	3.85	48.82	3.46569	1.67e-07	3.23e-06	4.89	29.36	3.03743	2.32083e-06	3.43598e-05	2.48	76.91	4.07	1.47438e-09	5.18791e-08	3.9	71.64	4.07094	2.03085e-09	9.36784e-08		0.428263		-0.000932957
Unigene9000_All	1225	0	38.37	6.74425	2.16e-07	4.06e-06	0	22.64	6.39268	1.67863e-06	2.58787e-05	0	36.01	6.38147	7.91463e-06	0.000105626	0	29.7	6.40459	6.7511e-06	0.000106595		0.351576		-0.0231213
Log2>0
		TSS-VS-TSR					USS-VS-USR					TTS-VS-TTR					UTS-VS-UTR						E-J		O-T
Unigene	Length	TSS-Expression	TSR-Expression	log2FoldChange(TSR/TSS)	Pvalue	Padj	USS-Expression	USR-Expression	log2FoldChange(USR/USS)	Pvalue	Padj	TTS-Expression	TTR-Expression	log2FoldChange(TTR/TTS)	Pvalue	Padj	UTS-Expression	UTR-Expression	log2FoldChange(UTR/UTS)	Pvalue	Padj
CL14540.Contig21_All	918	0.29	21.77	4.95388	1.22e-05	0.000141532	2.63	14.44	2.85579	0.000359499	0.00268223	0.33	33.21	5.20771	4.89369e-06	6.9506e-05	0.32	22.01	5.10377	1.6756e-05	0.000232685		2.09808		0.103935
CL20415.Contig5_All	1646	7.04	67.29	3.05499	0.00124923	0.0075591	17.39	49.65	2.129	0.000120832	0.00105895	6.59	155.27	3.66994	8.79522e-14	7.17984e-12	8.84	42.53	2.04862	0.00503326	0.0274948		0.92599		1.62132
CL5834.Contig3_All	765	0	8.46	4.72194	0.00141179	0.00838682	0	5.68	4.61249	0.00193763	0.0111168	0	9.85	4.81897	0.00208501	0.012436	0	6.12	4.65232	0.00292586	0.0176091		0.109453		0.166658
CL6462.Contig6_All	1333	0	14.26	5.46443	0.000102341	0.000892256	1.9	17.04	3.40173	0.000765137	0.0050822	0.28	29.79	4.97061	1.88416e-05	0.000224784	0.32	10.44	4.06143	0.00115566	0.00818703		2.0627		0.909183
Unigene17336_All	2910	0	50.53	7.05056	4.19e-08	9.46e-07	0	34.39	6.99479	5.04092e-08	1.18343e-06	0	31.31	6.1555	2.2846e-05	0.00026594	0	16.66	5.96471	3.49138e-05	0.0004353		0.0557676		0.190785
Unigene18924_All	1195	0.37	71.12	6.61952	6.33e-11	2.68e-09	0.41	38.89	6.26119	4.01587e-09	1.25562e-07	0.3	96.14	6.58406	7.84329e-10	2.92044e-08	0.34	61.37	6.38252	1.06979e-08	4.04346e-07		0.358333		0.201538
Unigene27121_All	3551	4.43	42.95	2.85054	0.00737236	0.033122	8.43	29.92	2.38946	0.000590533	0.0040781	4.24	58.88	2.83228	0.000388949	0.00302104	21.54	54.97	1.45301	0.00700917	0.0359566		0.461077		1.37927
Unigene48157_All	1199	0.64	28	4.4154	0.000250718	0.00192705	1.11	14.6	3.87813	6.37136e-05	0.000611697	0.28	34.43	5.20264	4.62278e-06	6.61011e-05	0.37	16.25	4.44064	0.000638264	0.00500834		0.537266		0.761999

## Sheet: glu
		TSS-VS-TSR					USS-VS-USR					TTS-VS-TTR					UTS-VS-UTR						E-J		O-T
Unigene	Length	TSS-Expression	TSR-Expression	log2FoldChange(TSR/TSS)	Pvalue	Padj	USS-Expression	USR-Expression	log2FoldChange(USR/USS)	Pvalue	Padj	TTS-Expression	TTR-Expression	log2FoldChange(TTR/TTS)	Pvalue	Padj	UTS-Expression	UTR-Expression	log2FoldChange(UTR/UTS)	Pvalue	Padj
CL10495.Contig6_All	932	3.74	72.36	4.0509	6.79e-11	2.86e-09	0.38	24.96	5.55763	1.43559e-06	2.26037e-05	0.58	68.88	5.50742	1.11625e-08	3.20057e-07	1.72	60.41	4.57193	7.23196e-06	0.000112962		-1.50673		0.935493
CL1370.Contig32_All	1911	0	31.41	6.49473	8.34e-07	1.34e-05	0.41	18.43	5.22076	3.81835e-06	5.30453e-05	0.33	34.88	5.22335	5.32101e-06	7.47606e-05	0	38.71	6.8401	7.76295e-07	1.65825e-05		1.27397		-1.61676
CL1370.Contig5_All	1889	1.4	19.3	3.40495	0.00025521	0.00195608	1.17	9.4	3.19896	0.00220598	0.0124076	0.63	24.93	4.16543	4.55217e-05	0.000483189	1.06	21.13	4.00089	2.63702e-05	0.000342849		0.205995		0.164538
CL19209.Contig3_All	2947	0	105.64	7.81741	4.98e-10	1.74e-08	0.38	24.31	5.62409	1.99679e-07	3.99877e-06	0.3	20.06	4.2373	0.00154758	0.0096946	0	34.23	6.37988	9.79468e-06	0.000147123		2.19332		-2.14258
CL20976.Contig2_All	990	0.68	190.75	7.31158	9.69e-16	9.59e-14	1.58	139.61	6.77974	6.99346e-22	1.79984e-19	5.87	573.7	5.62005	3.73706e-09	1.19803e-07	9.31	1927.25	7.12064	5.03732e-11	3.53199e-09		0.53184		-1.50059
CL21375.Contig5_All	1467	21.77	133.33	2.53607	5.33e-11	2.3e-09	37.23	76.34	1.65846	0.000295592	0.00226995	25.22	104.21	1.19513	0.0111907	0.0490625	37.64	100.8	1.45593	0.00488143	0.0268285		0.877616		-0.260808
CL3311.Contig12_All	1219	1.84	52.48	4.52202	7.53e-07	1.23e-05	2.87	45.06	4.4242	5.49114e-08	1.27706e-06	1.76	69.62	4.20033	1.75123e-07	3.73141e-06	3.94	26.51	2.38105	0.0104983	0.0497185		0.0978142		1.81928
CL3311.Contig4_All	816	0.88	48.68	5.03861	3.17e-09	9.35e-08	2.28	38.03	4.33649	3.69463e-07	6.88258e-06	0.83	63.28	4.89889	1.7126e-07	3.65752e-06	1.08	41.23	4.9358	3.76296e-08	1.20711e-06		0.702119		-0.0369094
CL3311.Contig9_All	1123	0	35.18	6.35348	3.08e-06	4.24e-05	0	38.36	7.15867	2.13193e-08	5.52909e-07	0	58.08	6.98983	4.3309e-07	8.30198e-06	0	63.2	7.53805	1.34841e-08	4.95724e-07		-0.80519		-0.548218
CL3707.Contig10_All	1272	7.09	88.62	3.52439	1.63e-07	3.16e-06	5.19	84.43	4.56248	1.42191e-15	1.5623e-13	24.06	219.98	2.31687	1.8025e-06	2.88608e-05	13.58	144.27	3.41041	6.46403e-13	7.12026e-11		-1.0381		-1.09355
CL3707.Contig8_All	1515	0.29	92.26	6.9489	4.57e-12	2.44e-10	0.76	104.5	7.03255	2.16379e-16	2.65862e-14	1.85	171.18	5.56693	3.39592e-16	4.09501e-14	1.72	140.05	6.13354	7.01358e-19	2.26346e-16		-0.0836516		-0.566604
CL5582.Contig5_All	2197	39.06	173.36	2.02307	7.57e-12	3.87e-10	39.96	106.05	1.96282	7.35295e-06	9.38989e-05	51.35	252.84	1.45618	0.000982799	0.00661497	55.43	201.87	1.87698	0.000109195	0.00114536		0.0602497		-0.420797
CL7025.Contig11_All	1492	0	16.92	5.67809	4.47e-05	0.000435843	0	8.89	5.29787	0.000191103	0.0015638	0	14.05	5.16924	0.000778602	0.00542788	0	14.31	5.71126	9.63773e-05	0.00103038		0.38022		-0.542013
CL7025.Contig13_All	1688	0.34	22.79	4.88406	6.69e-05	0.000618621	1.64	11.62	3.18988	0.00257219	0.0140883	0	46.49	6.66328	2.36898e-06	3.67472e-05	1.01	16.69	3.37487	0.00338065	0.0198585		1.69418		3.28841
CL7025.Contig8_All	1510	0	10.48	5.0204	0.000541723	0.00372607	0	13.93	5.57209	0.00010875	0.000967309	0	37.42	6.2858	1.49561e-05	0.000183507	0	14.31	5.62668	0.000137958	0.0013934		-0.551693		0.659122
CL7117.Contig2_All	1549	18.16	234.44	3.49855	5.01e-23	1.28e-20	17.92	181.03	3.94235	1.18517e-25	4.60636e-23	14	307.27	3.58167	1.49707e-14	1.38189e-12	22.18	198.88	3.15288	1.01382e-15	1.93967e-13		-0.443805		0.42879
CL7117.Contig24_All	1576	3.97	91.1	4.26747	1.82e-15	1.73e-13	8.26	46.59	2.98313	5.15203e-05	0.000509442	3.36	85.96	3.72687	7.69562e-07	1.37455e-05	0.64	86.26	6.33422	1.45784e-11	1.15903e-09		1.28433		-2.60736
CL7117.Contig25_All	1823	2.04	30.16	3.44772	0.000420411	0.00300024	0	30.08	6.77467	2.62749e-07	5.08705e-06	0	30.8	6.24045	1.3918e-05	0.000172453	0	26.24	6.45826	3.99937e-06	6.78334e-05		-3.32695		-0.217817
CL7117.Contig31_All	1909	0	189.93	8.76902	9.92e-14	7.09e-12	1.08	178.57	7.40777	6.36068e-23	1.82619e-20	0.28	269.49	8.0053	2.20033e-15	2.30663e-13	0	184.58	8.92053	7.50132e-13	8.10916e-11		1.36125		-0.915232
CL7117.Contig32_All	1896	0.59	322.85	8.1118	3.42e-23	8.98e-21	0	210.92	9.36222	2.52068e-16	3.07508e-14	0.55	304.18	7.49289	2.56301e-16	3.15772e-14	0	197.62	8.95205	6.88182e-13	7.51321e-11		-1.25042		-1.45916
CL7117.Contig39_All	1843	0	21.26	5.98161	1.11e-05	0.000129895	0	13.97	5.79963	2.73992e-05	0.000295233	0	15.74	4.52098	0.0067536	0.0326248	0	21.79	5.51974	0.000401341	0.00340226		0.181985		-0.998758
CL7117.Contig44_All	1484	8.51	61.48	2.71354	6.49e-08	1.4e-06	2.28	50.17	4.83661	1.39578e-12	9.16976e-11	3	60.83	3.38489	9.46181e-07	1.64395e-05	1.28	45.13	4.35897	4.54411e-05	0.000545702		-2.12306		-0.974087
CL7117.Contig45_All	888	42.27	116.76	1.35355	5.79e-05	0.000546267	66.96	101.11	1.25771	0.00351184	0.0182643	27.65	153.88	1.63676	0.000796405	0.0055362	28.4	98.21	1.66846	0.00332583	0.0195934		0.0958399		-0.0316973
CL7117.Contig50_All	1846	1.79	167.08	6.25487	1.33e-21	2.89e-19	3.56	102.7	5.0766	8.84072e-15	8.48689e-13	0	207.61	8.57856	2.57752e-11	1.31252e-09	0.69	174.36	7.44274	5.50029e-17	1.31684e-14		1.17827		1.13582
CL7117.Contig7_All	2094	0	8.66	4.82487	0.000997742	0.00625787	0	5.27	4.59073	0.0020151	0.0114905	0	9.08	4.70918	0.00282912	0.0160123	0	8.42	4.34529	0.00815441	0.0406286		0.23414		0.363893
CL7131.Contig1_All	1083	0	8.51	4.54768	0.00278816	0.0148386	0	4.11	4.17117	0.00646654	0.030325	4.16	36.06	2.27123	0.00313885	0.0174349	1.67	21.35	3.45061	0.000121874	0.00125696		0.376509		-1.17938
Unigene11004_All	2829	0.74	47.97	5.50062	2.34e-09	7.13e-08	0	27.23	6.72608	2.39251e-07	4.68343e-06	0	76.21	7.20596	1.78179e-07	3.78964e-06	0.74	46.11	5.48045	2.85802e-08	9.49841e-07		-1.22546		1.72551
Unigene14255_All	909	23.59	104.52	2.05009	4.16e-08	9.4e-07	24.95	84.24	2.37964	5.00217e-07	9.00138e-06	14.23	98.24	2.00763	0.000159752	0.00141498	8.13	92.55	3.25458	1.91725e-06	3.61052e-05		-0.329548		-1.24695
Unigene30056_All	2750	3.53	54.04	3.59719	5.28e-09	1.48e-07	6.71	44.57	3.24728	1.21782e-06	1.95923e-05	3.12	47.23	3.09107	2.40032e-06	3.71696e-05	10.01	40.88	2.00764	0.00024267	0.00223771		0.349907		1.08343
Unigene33078_All	1236	0	447.11	9.55049	1.23e-15	1.2e-13	0	440.31	10.2253	3.47408e-20	7.21775e-18	0	676.52	9.97461	5.51336e-16	6.38994e-14	1.28	363.75	7.51243	3.04038e-16	6.40072e-14		-0.674775		2.46217
Unigene58228_All	1084	4.14	295.06	5.58185	1.9e-08	4.68e-07	3.74	114.29	5.30818	5.41516e-16	6.26295e-14	91.14	384.81	1.2636	0.00328506	0.0181098	24.87	121.11	2.29202	2.94758e-05	0.000377105		0.273668		-1.02842
Unigene58239_All	894	4.73	194.83	4.84514	6.96e-07	1.14e-05	2.6	56.47	4.73475	1.37278e-09	4.82959e-08	5.6	246	4.63855	1.76743e-17	2.57412e-15	3.3	72.59	4.22021	8.27209e-09	3.23338e-07		0.110391		0.418346
Unigene9587_All	6623	3.13	102.7	4.80175	1.31e-15	1.27e-13	5.83	65.66	4.02767	3.63446e-15	3.72803e-13	1.74	113.92	4.93921	3.4631e-12	2.0988e-10	9.47	79.81	2.97927	2.8902e-08	9.58323e-07		0.774082		1.95994
Log2>0
		TSS-VS-TSR					USS-VS-USR					TTS-VS-TTR					UTS-VS-UTR						E-J		O-T
Unigene	Length	TSS-Expression	TSR-Expression	log2FoldChange(TSR/TSS)	Pvalue	Padj	USS-Expression	USR-Expression	log2FoldChange(USR/USS)	Pvalue	Padj	TTS-Expression	TTR-Expression	log2FoldChange(TTR/TTS)	Pvalue	Padj	UTS-Expression	UTR-Expression	log2FoldChange(UTR/UTS)	Pvalue	Padj
CL1370.Contig5_All	1889	1.4	19.3	3.40495	0.00025521	0.00195608	1.17	9.4	3.19896	0.00220598	0.0124076	0.63	24.93	4.16543	4.55217e-05	0.000483189	1.06	21.13	4.00089	2.63702e-05	0.000342849		0.205995		0.164538
CL3311.Contig12_All	1219	1.84	52.48	4.52202	7.53e-07	1.23e-05	2.87	45.06	4.4242	5.49114e-08	1.27706e-06	1.76	69.62	4.20033	1.75123e-07	3.73141e-06	3.94	26.51	2.38105	0.0104983	0.0497185		0.0978142		1.81928
CL7025.Contig13_All	1688	0.34	22.79	4.88406	6.69e-05	0.000618621	1.64	11.62	3.18988	0.00257219	0.0140883	0	46.49	6.66328	2.36898e-06	3.67472e-05	1.01	16.69	3.37487	0.00338065	0.0198585		1.69418		3.28841
CL7117.Contig50_All	1846	1.79	167.08	6.25487	1.33e-21	2.89e-19	3.56	102.7	5.0766	8.84072e-15	8.48689e-13	0	207.61	8.57856	2.57752e-11	1.31252e-09	0.69	174.36	7.44274	5.50029e-17	1.31684e-14		1.17827		1.13582
CL7117.Contig7_All	2094	0	8.66	4.82487	0.000997742	0.00625787	0	5.27	4.59073	0.0020151	0.0114905	0	9.08	4.70918	0.00282912	0.0160123	0	8.42	4.34529	0.00815441	0.0406286		0.23414		0.363893
Unigene30056_All	2750	3.53	54.04	3.59719	5.28e-09	1.48e-07	6.71	44.57	3.24728	1.21782e-06	1.95923e-05	3.12	47.23	3.09107	2.40032e-06	3.71696e-05	10.01	40.88	2.00764	0.00024267	0.00223771		0.349907		1.08343
Unigene58239_All	894	4.73	194.83	4.84514	6.96e-07	1.14e-05	2.6	56.47	4.73475	1.37278e-09	4.82959e-08	5.6	246	4.63855	1.76743e-17	2.57412e-15	3.3	72.59	4.22021	8.27209e-09	3.23338e-07		0.110391		0.418346
Unigene9587_All	6623	3.13	102.7	4.80175	1.31e-15	1.27e-13	5.83	65.66	4.02767	3.63446e-15	3.72803e-13	1.74	113.92	4.93921	3.4631e-12	2.0988e-10	9.47	79.81	2.97927	2.8902e-08	9.58323e-07		0.774082		1.95994

## Sheet: gly
		TSS-VS-TSR					USS-VS-USR					TTS-VS-TTR					UTS-VS-UTR						E-J		O-T
Unigene	Length	TSS-Expression	TSR-Expression	log2FoldChange(TSR/TSS)	Pvalue	Padj	USS-Expression	USR-Expression	log2FoldChange(USR/USS)	Pvalue	Padj	TTS-Expression	TTR-Expression	log2FoldChange(TTR/TTS)	Pvalue	Padj	UTS-Expression	UTR-Expression	log2FoldChange(UTR/UTS)	Pvalue	Padj
CL11547.Contig2_All	2306	1.4	115.01	5.73763	7.24e-09	1.97e-07	2.78	61.66	4.89551	1.52911e-09	5.31412e-08	2.43	279.22	5.85637	6.14963e-16	7.06224e-14	2.59	178.52	5.63121	1.32939e-11	1.06768e-09		0.842113		0.225161
CL11547.Contig5_All	2236	6.73	272.64	4.93147	6.89e-09	1.88e-07	6.15	169.54	5.16182	1.17154e-11	6.48592e-10	37.2	770.96	3.56423	1.62698e-10	7.1018e-09	33.25	429.5	3.61497	2.80397e-11	2.08035e-09		-0.230357		-0.0507362
CL12316.Contig4_All	1777	17.87	136.08	2.7194	2.66e-08	6.32e-07	5.21	55.91	3.80148	1.44935e-07	3.01996e-06	3.45	213.86	5.0981	2.46228e-19	4.56599e-17	5.37	140.28	4.42057	1.48185e-08	5.36941e-07		-1.08207		0.677533
CL1681.Contig5_All	3010	0	56.05	7.21387	1.45e-08	3.68e-07	6.47	48.31	3.12383	0.00270695	0.014687	0	136.69	8.00338	2.00606e-09	6.82793e-08	14.57	84.62	2.55291	0.00958338	0.0462674		4.09005		5.45047
CL18748.Contig3_All	1748	0.29	13.56	4.31433	0.000232455	0.00180523	0.38	13.69	4.78903	3.19992e-05	0.000337647	0.91	43.97	4.29314	0.000157806	0.00140023	0	18.65	5.91209	6.74768e-05	0.000764136		-0.474699		-1.61896
CL21009.Contig11_All	1548	2.43	157.78	5.72606	1.19e-19	1.99e-17	7.5	130.39	4.67643	2.07974e-18	3.43092e-16	2.79	145.66	4.75066	8.35269e-11	3.86413e-09	1.65	109.48	5.74071	9.67351e-15	1.53702e-12		1.04963		-0.990041
CL21009.Contig8_All	1523	0	117.74	8.14925	1.8e-11	8.55e-10	0	65.89	7.87071	1.17633e-10	5.3101e-09	0	72.01	7.21412	1.39707e-07	3.04918e-06	0	50.02	7.1536	1.86857e-07	4.85865e-06		0.278546		0.0605179
CL21324.Contig2_All	1629	0	14.75	5.48323	9.52e-05	0.000838339	0	8.08	5.1636	0.000304655	0.0023278	0.33	15.87	4.1967	0.000878825	0.00601408	0	12.31	5.58403	0.000152633	0.00151643		0.319622		-1.38733
CL21364.Contig12_All	1712	24.87	301.36	3.4655	3.65e-20	6.62e-18	51.46	233.44	2.76684	3.25547e-13	2.39997e-11	25.8	355.46	2.91666	2.69152e-08	7.06553e-07	42.41	278.74	2.74137	3.84283e-06	6.55823e-05		0.698664		0.175292
CL21418.Contig10_All	1835	0.37	47.47	5.81488	1.14e-06	1.77e-05	1.17	33.27	5.0387	3.357e-09	1.06812e-07	2.04	124.91	4.87436	2.11161e-10	8.99097e-09	4.21	162.42	5.08259	2.84672e-07	6.96591e-06		0.77618		-0.208233
CL21418.Contig25_All	2242	8.85	222.07	4.3975	3.86e-07	6.79e-06	7.55	193.62	5.07518	1.66977e-18	2.78406e-16	8.87	444.15	4.48993	5.39615e-10	2.08196e-08	8.49	206.66	4.43843	1.23762e-11	1.00451e-09		-0.677675		0.0515002
CL21418.Contig26_All	2285	60.06	227.2	1.89856	0.00594982	0.0278128	27.64	197.35	3.28494	2.02017e-12	1.2925e-10	122.86	521.57	1.26928	0.000410111	0.00316086	32.61	247.93	2.95723	5.19101e-06	8.49459e-05		-1.38638		-1.68795
CL21418.Contig3_All	2543	0.37	64.5	6.30609	2.43e-08	5.83e-07	1.05	44.08	5.35094	5.98752e-10	2.29489e-08	0.3	146.39	7.16248	6.33548e-12	3.64975e-10	0.34	94.93	7.11663	4.73337e-11	3.33757e-09		0.95515		0.0458474
CL21418.Contig32_All	2125	8.84	113.49	3.51104	3.59e-05	0.000360519	5.86	96.31	4.56824	2.08478e-16	2.56892e-14	15.3	389.81	3.90244	1.20914e-11	6.53951e-10	13.81	472.84	5.01778	8.21168e-09	3.21333e-07		-1.0572		-1.11534
CL2187.Contig3_All	1660	53.39	203.2	1.65288	0.00319508	0.0166146	19.94	109.47	2.85073	7.86076e-06	9.95089e-05	4.16	98.27	3.5071	2.25977e-06	3.52646e-05	8.13	80.83	2.88521	0.00110607	0.00788773		-1.19785		0.62189
CL2491.Contig9_All	1835	0	33.35	6.37194	2.79e-06	3.89e-05	0.35	36.06	6.13284	1.10451e-08	3.08483e-07	1.21	73.88	4.77025	7.77728e-08	1.81231e-06	1.37	37.82	4.35719	7.25969e-06	0.000113325		0.239107		0.41306
CL4015.Contig4_All	1798	4.46	187.88	5.11569	3.18e-17	3.94e-15	1.96	122.53	6.29687	1.07705e-20	2.36678e-18	4.06	146.77	4.25566	1.59158e-08	4.40414e-07	2.21	277.11	6.6518	4.57143e-13	5.20412e-11		-1.18118		-2.39614
CL6187.Contig3_All	1624	0.34	64.56	6.41068	9.07e-10	3.02e-08	0	73.38	7.96011	7.28903e-11	3.43891e-09	0	25.99	5.93218	5.57695e-05	0.000575236	0	16.5	5.92955	4.72245e-05	0.000563543		-1.54943		0.00263294
Unigene22843_All	1281	25.48	391.59	3.81474	8.06e-34	5.72e-31	67.01	278.95	2.69266	4.13431e-16	4.85362e-14	50.11	496.05	2.48453	2.04134e-13	1.5554e-11	67.17	291.46	2.09872	4.64091e-09	1.94845e-07		1.12208		0.385806
Unigene31684_All	1681	17.23	67.9	1.86443	0.000213272	0.00167596	5.59	71.8	4.10878	3.10344e-13	2.30175e-11	5.29	69.3	2.72886	1.97247e-05	0.000234177	3.4	38.07	3.17589	0.000917665	0.00676144		-2.24435		-0.447032
Log2>0
		TSS-VS-TSR					USS-VS-USR					TTS-VS-TTR					UTS-VS-UTR						E-J		O-T
Unigene	Length	TSS-Expression	TSR-Expression	log2FoldChange(TSR/TSS)	Pvalue	Padj	USS-Expression	USR-Expression	log2FoldChange(USR/USS)	Pvalue	Padj	TTS-Expression	TTR-Expression	log2FoldChange(TTR/TTS)	Pvalue	Padj	UTS-Expression	UTR-Expression	log2FoldChange(UTR/UTS)	Pvalue	Padj
CL11547.Contig2_All	2306	1.4	115.01	5.73763	7.24e-09	1.97e-07	2.78	61.66	4.89551	1.52911e-09	5.31412e-08	2.43	279.22	5.85637	6.14963e-16	7.06224e-14	2.59	178.52	5.63121	1.32939e-11	1.06768e-09		0.842113		0.225161
CL1681.Contig5_All	3010	0	56.05	7.21387	1.45e-08	3.68e-07	6.47	48.31	3.12383	0.00270695	0.014687	0	136.69	8.00338	2.00606e-09	6.82793e-08	14.57	84.62	2.55291	0.00958338	0.0462674		4.09005		5.45047
CL21009.Contig8_All	1523	0	117.74	8.14925	1.8e-11	8.55e-10	0	65.89	7.87071	1.17633e-10	5.3101e-09	0	72.01	7.21412	1.39707e-07	3.04918e-06	0	50.02	7.1536	1.86857e-07	4.85865e-06		0.278546		0.0605179
CL21364.Contig12_All	1712	24.87	301.36	3.4655	3.65e-20	6.62e-18	51.46	233.44	2.76684	3.25547e-13	2.39997e-11	25.8	355.46	2.91666	2.69152e-08	7.06553e-07	42.41	278.74	2.74137	3.84283e-06	6.55823e-05		0.698664		0.175292
CL21418.Contig3_All	2543	0.37	64.5	6.30609	2.43e-08	5.83e-07	1.05	44.08	5.35094	5.98752e-10	2.29489e-08	0.3	146.39	7.16248	6.33548e-12	3.64975e-10	0.34	94.93	7.11663	4.73337e-11	3.33757e-09		0.95515		0.0458474
CL2491.Contig9_All	1835	0	33.35	6.37194	2.79e-06	3.89e-05	0.35	36.06	6.13284	1.10451e-08	3.08483e-07	1.21	73.88	4.77025	7.77728e-08	1.81231e-06	1.37	37.82	4.35719	7.25969e-06	0.000113325		0.239107		0.41306
Unigene22843_All	1281	25.48	391.59	3.81474	8.06e-34	5.72e-31	67.01	278.95	2.69266	4.13431e-16	4.85362e-14	50.11	496.05	2.48453	2.04134e-13	1.5554e-11	67.17	291.46	2.09872	4.64091e-09	1.94845e-07		1.12208		0.385806

## Sheet: mon
		TTS-VS-TTR					UTS-VS-UTR					TSS-VS-TSR					USS-VS-USR						E-J		O-T
Unigene	Length	TTS-Expression	TTR-Expression	log2FoldChange(TTR/TTS)	Pvalue	Padj	UTS-Expression	UTR-Expression	log2FoldChange(UTR/UTS)	Pvalue	Padj	TSS-Expression	TSR-Expression	log2FoldChange(TSR/TSS)	Pvalue	Padj	USS-Expression	USR-Expression	log2FoldChange(USR/USS)	Pvalue	Padj
CL15061.Contig3_All	1453	14.21	65.66	2.08062	3.93e-06	5.23e-05	17.36	52.83	2.2155	1.89987e-07	3.82524e-06	17.37	84.35	1.50621	0.00230391	0.013514	22.16	51.8	1.3131	0.00821974	0.0408859		-0.134882		0.193104
CL19928.Contig14_All	1951	0	83.1	7.61921	1.25e-09	4.05e-08	5.57	80.96	4.40313	1.1761e-14	1.10851e-12	11.23	205.03	2.96551	0.00187494	0.0113826	26.38	117.84	2.25382	1.07537e-05	0.000159261		3.21608		0.711689
CL20016.Contig1_All	2231	0	34.31	6.52301	1.01e-06	1.59e-05	0	25.48	6.66222	3.11548e-07	5.90576e-06	0	43.22	6.5863	4.32834e-06	6.23369e-05	0	28.65	5.33385	0.000829564	0.00622793		-0.139217		1.25245
CL20016.Contig13_All	2456	0	13.96	5.4398	0.000110939	0.000956079	0.35	7.05	3.62088	0.00621	0.0293209	0	12.41	4.4387	0.00749191	0.0355318	3.25	27.81	2.78457	0.00288704	0.0174183		1.81892		1.65413
CL20016.Contig19_All	2332	0	7.1	4.05204	0.0100787	0.0428162	0	6.45	4.30554	0.00590133	0.0280843	0	11.57	4.96994	0.00137994	0.00880372	0	13.53	5.47997	0.000241991	0.00223239		-0.2535		-0.510037
CL20016.Contig20_All	2305	0.37	90.44	6.93679	6.1e-12	3.18e-10	0	61.37	7.76388	3.50282e-10	1.42138e-08	0	126.35	7.80874	6.79866e-09	2.05026e-07	0	70.81	7.55496	1.80924e-08	6.37605e-07		-0.827089		0.253781
CL20016.Contig25_All	1942	0	106.79	8.01799	5.49e-11	2.36e-09	0	76.64	7.94218	1.07953e-10	4.91849e-09	0	81.4	7.34568	7.2172e-08	1.69459e-06	0	55.45	6.65515	4.86361e-06	8.02065e-05		0.0758096		0.690525
CL20016.Contig33_All	2390	0	72.77	7.43075	5.12e-09	1.44e-07	0	60.97	7.78363	2.22215e-10	9.44176e-09	0	82.92	6.88287	2.343e-06	3.6402e-05	0	72.21	7.75082	3.78135e-09	1.62712e-07		-0.352881		-0.867944
CL20016.Contig6_All	2468	0	48.75	6.95836	9.59e-08	1.98e-06	0	34.65	7.05908	3.30554e-08	8.17806e-07	0	54.6	6.92057	6.27022e-07	1.14844e-05	0	43.73	7.07171	2.39778e-07	6.02205e-06		-0.100717		-0.151134
CL20016.Contig7_All	2490	0	20.49	5.28426	0.000400333	0.00288142	0	16.11	5.91634	2.1768e-05	0.000240948	0	18.2	5.54685	0.000234922	0.00196684	0	18.66	5.84799	6.90052e-05	0.000779091		-0.632079		-0.301145
CL2133.Contig1_All	1784	0.34	51.68	6.12929	9.01e-09	2.4e-07	0.79	20.52	4.61447	3.97576e-05	0.000406498	0.61	71.13	5.42042	1.54141e-07	3.32992e-06	0	65.71	7.46271	3.31927e-08	1.08051e-06		1.51482		-2.04229
CL2133.Contig13_All	1831	5.89	94.92	3.8656	1.55e-13	1.07e-11	8.05	102.29	4.21885	5.58935e-21	1.29091e-18	20.39	180.36	2.24649	7.49323e-06	0.000100693	22.95	128.96	2.43127	5.55184e-07	1.241e-05		-0.353257		-0.184785
CL2133.Contig4_All	1909	0.29	14.27	3.86961	0.00601051	0.0280349	0.35	61	6.87735	8.47556e-12	4.83437e-10	0	87.23	7.41799	5.64343e-08	1.36798e-06	1.65	36.49	4.19043	2.85267e-07	6.97756e-06		-3.00774		3.22756
CL2156.Contig1_All	1797	0	122.99	8.14547	3.18e-11	1.43e-09	0	86.64	8.14649	2.89605e-11	1.47647e-09	9.12	117.31	2.51119	0.00804948	0.0376505	0	95.98	7.99683	8.88139e-10	4.51e-08		-0.00101506		-5.48564
CL2417.Contig11_All	2465	0	37.01	6.70307	2.66e-07	4.89e-06	2.75	24.03	3.57995	3.34113e-06	4.72389e-05	1.38	56.44	4.03315	2.02414e-05	0.00023947	0	37.31	6.89494	4.67461e-07	1.06753e-05		3.12312		-2.86179
CL2417.Contig4_All	2501	0	12.28	5.25411	0.000226805	0.00176807	0	8.39	4.62589	0.00251556	0.0138276	0.3	17.7	4.28616	0.000595498	0.00433467	0	7.88	4.71961	0.00267556	0.0163637		0.628221		-0.433453
CL2659.Contig2_All	2067	0	18.64	5.79392	2.78e-05	0.000288761	0	31.16	6.85669	1.5282e-07	3.1631e-06	1.66	139.22	5.33983	6.99688e-07	1.26503e-05	0	372.02	9.41667	5.7185e-13	6.35338e-11		-1.06278		-4.07685
CL353.Contig78_All	1681	35.78	160.56	2.0564	0.0050373	0.0242163	8.27	77.55	3.47062	1.52943e-06	2.38707e-05	27.93	367.96	2.77449	9.06899e-06	0.000118849	22.54	89.43	2.04654	0.000171447	0.00167157		-1.41421		0.727955
CL4070.Contig2_All	2031	14.18	148.65	3.09524	1.4e-07	2.75e-06	28.62	74.25	1.95641	2.38966e-08	6.1243e-07	24.62	151.47	1.81784	1.32844e-06	2.20969e-05	30.18	101.98	1.66482	0.00102558	0.00740973		1.13883		0.153029
CL4070.Contig3_All	1972	1.47	33.72	3.72532	8.28e-05	0.000743295	7.5	23.37	2.16999	0.00612628	0.0289839	0	45.6	6.71171	1.65651e-06	2.67694e-05	0.64	22.61	4.57108	7.47263e-06	0.000116215		1.55533		2.14062
CL4144.Contig6_All	1725	37.88	228.83	2.53165	3.54e-07	6.29e-06	36.78	231.6	3.22457	1.00225e-29	5.54154e-27	53.67	395.14	2.02821	3.83717e-06	5.6122e-05	86.58	338.69	2.04074	1.0858e-05	0.00016059		-0.69292		-0.0125391
CL4144.Contig7_All	1800	40.43	261.04	2.61082	8.91e-10	2.97e-08	40.53	219.53	3.03124	2.30594e-25	8.78317e-23	56.49	377.89	1.91712	2.55501e-05	0.000293036	101.71	303.51	1.64688	0.00164731	0.0110067		-0.420418		0.270234
CL6469.Contig8_All	2336	65.42	405.48	2.54215	0.000132943	0.00111695	86.03	316.22	2.48202	3.1791e-07	6.01373e-06	129.3	487.1	1.20772	0.00121853	0.00793654	87.9	695.81	3.06698	6.08997e-08	1.83782e-06		0.0601346		-1.85925
CL7110.Contig9_All	1794	0	116.62	7.96739	1.58e-10	6.2e-09	0	171.36	8.75361	6.72737e-13	4.67404e-11	0	76.24	7.35507	6.15583e-08	1.47405e-06	0	57.95	7.47041	2.92832e-08	9.68819e-07		-0.786213		-0.115342
CL771.Contig16_All	2275	14.83	440.34	4.71761	3.44e-10	1.25e-08	0	293.02	9.72198	1.38439e-17	2.0368e-15	10.27	692.95	4.83973	5.03283e-10	1.95853e-08	15.61	408.38	4.17539	5.59058e-07	1.24839e-05		-5.00437		0.664335
CL9534.Contig6_All	982	0	35.91	6.66201	3.41e-07	6.09e-06	0	30.31	6.872	1.08646e-07	2.33916e-06	0.28	27.52	4.8892	3.75076e-05	0.000408575	0	18.89	6.10941	1.85415e-05	0.000253662		-0.209987		-1.22021
Unigene33113_All	1708	24.3	129.03	2.35695	0.000317845	0.00236513	13.74	160.2	3.84524	2.56852e-07	4.98809e-06	11.9	164.91	2.71039	0.00391935	0.0209456	8.02	79.63	3.02909	0.00403608	0.0229698		-1.48829		-0.318698
Unigene43902_All	1786	7.53	29.74	1.75547	0.00611659	0.0284252	6.38	29.19	2.659	8.45331e-06	0.000105899	6.81	49.56	2.06476	0.000154536	0.00137495	3.08	32.18	3.22811	6.62746e-06	0.000104906		-0.90353		-1.16335
Unigene55461_All	2180	13.61	63.66	2.09534	1.16e-06	1.79e-05	23.1	49.5	1.71038	0.000640645	0.00437394	9.76	113.01	2.68384	3.21356e-07	6.39206e-06	16.55	88.01	2.33696	6.31742e-06	0.000100595		0.384965		0.346886
Unigene55465_All	2117	21.86	58.38	1.27631	0.00287625	0.0152225	38.68	54.19	1.04002	0.00923896	0.0406295	16.51	97.39	1.76603	9.61229e-06	0.000125029	20.09	77.54	1.94416	1.39191e-05	0.000199031		0.236288		-0.178127
		Log2>0
		TTS-VS-TTR					UTS-VS-UTR					TSS-VS-TSR					USS-VS-USR						E-J		O-T
Unigene	Length	TTS-Expression	TTR-Expression	log2FoldChange(TTR/TTS)	Pvalue	Padj	UTS-Expression	UTR-Expression	log2FoldChange(UTR/UTS)	Pvalue	Padj	TSS-Expression	TSR-Expression	log2FoldChange(TSR/TSS)	Pvalue	Padj	USS-Expression	USR-Expression	log2FoldChange(USR/USS)	Pvalue	Padj
CL19928.Contig14_All	1951	0	83.1	7.61921	1.25e-09	4.05e-08	5.57	80.96	4.40313	1.1761e-14	1.10851e-12	11.23	205.03	2.96551	0.00187494	0.0113826	26.38	117.84	2.25382	1.07537e-05	0.000159261		3.21608		0.711689
CL20016.Contig25_All	1942	0	106.79	8.01799	5.49e-11	2.36e-09	0	76.64	7.94218	1.07953e-10	4.91849e-09	0	81.4	7.34568	7.2172e-08	1.69459e-06	0	55.45	6.65515	4.86361e-06	8.02065e-05		0.0758096		0.690525
CL4070.Contig2_All	2031	14.18	148.65	3.09524	1.4e-07	2.75e-06	28.62	74.25	1.95641	2.38966e-08	6.1243e-07	24.62	151.47	1.81784	1.32844e-06	2.20969e-05	30.18	101.98	1.66482	0.00102558	0.00740973		1.13883		0.153029
CL4070.Contig3_All	1972	1.47	33.72	3.72532	8.28e-05	0.000743295	7.5	23.37	2.16999	0.00612628	0.0289839	0	45.6	6.71171	1.65651e-06	2.67694e-05	0.64	22.61	4.57108	7.47263e-06	0.000116215		1.55533		2.14062
Unigene55461_All	2180	13.61	63.66	2.09534	1.16e-06	1.79e-05	23.1	49.5	1.71038	0.000640645	0.00437394	9.76	113.01	2.68384	3.21356e-07	6.39206e-06	16.55	88.01	2.33696	6.31742e-06	0.000100595		0.384965		0.346886

## Sheet: P450
		TSS-VS-TSR					USS-VS-USR					TTS-VS-TTR					UTS-VS-UTR						E-J		O-T
Unigene	Length	TSS-Expression	TSR-Expression	log2FoldChange(TSR/TSS)	Pvalue	Padj	USS-Expression	USR-Expression	log2FoldChange(USR/USS)	Pvalue	Padj	TTS-Expression	TTR-Expression	log2FoldChange(TTR/TTS)	Pvalue	Padj	UTS-Expression	UTR-Expression	log2FoldChange(UTR/UTS)	Pvalue	Padj
CL14001.Contig10_All	1893	2.4	94.54	4.97707	9.62e-14	6.9e-12	8.34	86.67	3.82944	8.29963e-13	5.67214e-11	3.97	159.13	4.44258	9.33398e-12	5.19511e-10	2.02	95.29	5.29823	1.27656e-11	1.03042e-09		1.14762		-0.855648
CL14001.Contig5_All	726	2.88	21.64	2.71331	0.0025883	0.0139499	6.27	31.63	2.89235	7.55735e-07	1.29431e-05	2.62	56.63	3.42685	1.50878e-05	0.000184839	5.05	33.24	2.56756	0.00054104	0.00436798		-0.179049		0.859294
CL14001.Contig8_All	1895	4.14	45.54	3.22241	7.87e-06	9.63e-05	3.83	47.62	4.06924	1.12012e-10	5.08583e-09	7.16	294.87	4.37421	1.97625e-08	5.36727e-07	6.9	123.64	4.07711	8.68371e-06	0.000132629		-0.846828		0.297097
CL17743.Contig16_All	5544	35.94	99.21	1.37007	0.000123439	0.00104846	65.76	111.49	1.36119	1.90336e-05	0.000214618	39.33	153.55	1.15902	0.00673173	0.0325316	52.43	131.14	1.37172	0.00167661	0.0111597		0.00888056		-0.212699
CL19928.Contig14_All	1951	0	83.1	7.61921	1.25e-09	4.05e-08	5.57	80.96	4.40313	1.1761e-14	1.10851e-12	11.23	205.03	2.96551	0.00187494	0.0113826	26.38	117.84	2.25382	1.07537e-05	0.000159261		3.21608		0.711689
CL20016.Contig1_All	2231	0	34.31	6.52301	1.01e-06	1.59e-05	0	25.48	6.66222	3.11548e-07	5.90576e-06	0	43.22	6.5863	4.32834e-06	6.23369e-05	0	28.65	5.33385	0.000829564	0.00622793		-0.139217		1.25245
CL20016.Contig13_All	2456	0	13.96	5.4398	0.000110939	0.000956079	0.35	7.05	3.62088	0.00621	0.0293209	0	12.41	4.4387	0.00749191	0.0355318	3.25	27.81	2.78457	0.00288704	0.0174183		1.81892		1.65413
CL20016.Contig19_All	2332	0	7.1	4.05204	0.0100787	0.0428162	0	6.45	4.30554	0.00590133	0.0280843	0	11.57	4.96994	0.00137994	0.00880372	0	13.53	5.47997	0.000241991	0.00223239		-0.2535		-0.510037
CL20016.Contig20_All	2305	0.37	90.44	6.93679	6.1e-12	3.18e-10	0	61.37	7.76388	3.50282e-10	1.42138e-08	0	126.35	7.80874	6.79866e-09	2.05026e-07	0	70.81	7.55496	1.80924e-08	6.37605e-07		-0.827089		0.253781
CL20016.Contig25_All	1942	0	106.79	8.01799	5.49e-11	2.36e-09	0	76.64	7.94218	1.07953e-10	4.91849e-09	0	81.4	7.34568	7.2172e-08	1.69459e-06	0	55.45	6.65515	4.86361e-06	8.02065e-05		0.0758096		0.690525
CL20016.Contig33_All	2390	0	72.77	7.43075	5.12e-09	1.44e-07	0	60.97	7.78363	2.22215e-10	9.44176e-09	0	82.92	6.88287	2.343e-06	3.6402e-05	0	72.21	7.75082	3.78135e-09	1.62712e-07		-0.352881		-0.867944
CL20016.Contig6_All	2468	0	48.75	6.95836	9.59e-08	1.98e-06	0	34.65	7.05908	3.30554e-08	8.17806e-07	0	54.6	6.92057	6.27022e-07	1.14844e-05	0	43.73	7.07171	2.39778e-07	6.02205e-06		-0.100717		-0.151134
CL20016.Contig7_All	2490	0	20.49	5.28426	0.000400333	0.00288142	0	16.11	5.91634	2.1768e-05	0.000240948	0	18.2	5.54685	0.000234922	0.00196684	0	18.66	5.84799	6.90052e-05	0.000779091		-0.632079		-0.301145
CL20021.Contig10_All	1835	0	5.49	4.15635	0.00695213	0.031543	0.35	7.44	3.94497	0.00126421	0.00775244	0	11.01	4.75275	0.00276202	0.0157123	0	6.43	4.72826	0.00237013	0.0148224		0.211372		0.0244892
CL20021.Contig11_All	1783	0.29	40.34	5.79209	5.25e-08	1.16e-06	1.05	20.97	3.65224	0.00595678	0.0283043	0	37.78	6.30159	1.55444e-05	0.000189904	0	17.73	6.00203	2.92981e-05	0.000375104		2.13985		0.299559
CL20021.Contig6_All	1796	0	30.24	6.38007	1.72e-06	2.55e-05	0.38	33	6.02067	1.07814e-08	3.02126e-07	0.55	53.07	5.10404	3.44569e-07	6.79768e-06	0.32	19.06	5.02318	1.81367e-05	0.000249033		0.359408		0.0808633
CL20021.Contig8_All	1814	0.37	19.48	4.85025	1.83e-05	0.00020063	1.17	25.94	4.69138	1.27285e-07	2.68914e-06	0.58	34.01	4.55007	4.17122e-06	6.03259e-05	1.37	17.74	3.51226	7.44745e-05	0.000829834		0.158872		1.03782
CL2053.Contig15_All	1879	10.34	39.41	1.82962	0.000243785	0.00188074	9.19	40.87	2.55972	0.000439631	0.0031823	6.17	135.93	3.52737	4.30307e-10	1.70394e-08	13.42	110.67	3.14641	0.00031425	0.00277505		-0.730102		0.380954
CL2133.Contig1_All	1784	0.34	51.68	6.12929	9.01e-09	2.4e-07	0.79	20.52	4.61447	3.97576e-05	0.000406498	0.61	71.13	5.42042	1.54141e-07	3.32992e-06	0	65.71	7.46271	3.31927e-08	1.08051e-06		1.51482		-2.04229
CL2133.Contig13_All	1831	5.89	94.92	3.8656	1.55e-13	1.07e-11	8.05	102.29	4.21885	5.58935e-21	1.29091e-18	20.39	180.36	2.24649	7.49323e-06	0.000100693	22.95	128.96	2.43127	5.55184e-07	1.241e-05		-0.353257		-0.184785
CL2133.Contig4_All	1909	0.29	14.27	3.86961	0.00601051	0.0280349	0.35	61	6.87735	8.47556e-12	4.83437e-10	0	87.23	7.41799	5.64343e-08	1.36798e-06	1.65	36.49	4.19043	2.85267e-07	6.97756e-06		-3.00774		3.22756
CL21463.Contig48_All	2607	0	20.9	5.90894	1.71e-05	0.000189413	0	14.33	5.62264	8.13784e-05	0.000753358	0	37.49	6.43137	6.46631e-06	8.86641e-05	0	13.2	4.83077	0.00265168	0.0162363		0.2863		1.6006
CL21463.Contig52_All	1906	0	18.8	5.81532	2.39e-05	0.000253918	0.38	14.29	4.71759	7.4735e-05	0.000700138	0	16.11	5.29573	0.000582496	0.00425693	0	19.19	6.07868	2.17591e-05	0.000290817		1.09774		-0.782955
CL21463.Contig81_All	2918	0	7.59	4.64266	0.00177906	0.0101734	0	10.97	5.57643	6.50367e-05	0.000622587	0.28	16.31	4.20045	0.000518976	0.00386023	0	18.29	6.00634	3.162e-05	0.000400237		-0.933779		-1.80589
CL21463.Contig85_All	3581	0.34	21.14	4.82325	6.82e-05	0.000629634	0	8.6	5.05606	0.000507058	0.00358898	0	33.25	5.9894	6.07259e-05	0.000618316	0.32	20.58	4.99147	1.92306e-05	0.000261767		-0.232808		0.99793
CL2156.Contig1_All	1797	0	122.99	8.14547	3.18e-11	1.43e-09	0	86.64	8.14649	2.89605e-11	1.47647e-09	9.12	117.31	2.51119	0.00804948	0.0376505	0	95.98	7.99683	8.88139e-10	4.51e-08		-0.00101506		-5.48564
CL2156.Contig4_All	1852	0	33.19	6.54864	6.5e-07	1.08e-05	3.13	43.48	4.2463	1.99512e-10	8.56847e-09	0	73.7	7.30542	7.37793e-08	1.7268e-06	0.74	27.39	4.79111	2.72775e-06	4.90063e-05		2.30234		2.51431
CL397.Contig21_All	4105	82.1	220.18	1.27021	0.0019463	0.0109654	116.91	184.04	1.26911	5.1255e-05	0.000506995	64.41	319.04	1.42931	0.00141815	0.00900466	79.02	192.07	1.29225	0.00549796	0.029537		0.00109713		0.137055
CL4070.Contig3_All	1972	1.47	33.72	3.72532	8.28e-05	0.000743295	7.5	23.37	2.16999	0.00612628	0.0289839	0	45.6	6.71171	1.65651e-06	2.67694e-05	0.64	22.61	4.57108	7.47263e-06	0.000116215		1.55533		2.14062
CL4144.Contig6_All	1725	37.88	228.83	2.53165	3.54e-07	6.29e-06	36.78	231.6	3.22457	1.00225e-29	5.54154e-27	53.67	395.14	2.02821	3.83717e-06	5.6122e-05	86.58	338.69	2.04074	1.0858e-05	0.00016059		-0.69292		-0.0125391
CL4144.Contig7_All	1800	40.43	261.04	2.61082	8.91e-10	2.97e-08	40.53	219.53	3.03124	2.30594e-25	8.78317e-23	56.49	377.89	1.91712	2.55501e-05	0.000293036	101.71	303.51	1.64688	0.00164731	0.0110067		-0.420418		0.270234
CL7110.Contig9_All	1794	0	116.62	7.96739	1.58e-10	6.2e-09	0	171.36	8.75361	6.72737e-13	4.67404e-11	0	76.24	7.35507	6.15583e-08	1.47405e-06	0	57.95	7.47041	2.92832e-08	9.68819e-07		-0.786213		-0.115342
CL771.Contig16_All	2275	14.83	440.34	4.71761	3.44e-10	1.25e-08	0	293.02	9.72198	1.38439e-17	2.0368e-15	10.27	692.95	4.83973	5.03283e-10	1.95853e-08	15.61	408.38	4.17539	5.59058e-07	1.24839e-05		-5.00437		0.664335
CL9863.Contig7_All	1868	0	4.78	3.9899	0.0103088	0.0435741	1.14	17.52	3.91385	0.000943335	0.00605443	0.55	14.32	3.31162	0.00488207	0.0250808	3.08	67.02	3.91073	0.00284653	0.0172311		0.0760453		-0.599107
Unigene15376_All	1094	0	8.33	4.7583	0.00124278	0.00752798	0.38	5.27	3.42549	0.00903572	0.0398892	0.55	14.08	3.27875	0.00487848	0.0250656	0.34	18.05	4.93782	2.41045e-05	0.000317657		1.3328		-1.65907
Unigene18875_All	1736	17.01	66.8	1.87251	4.07e-05	0.000401981	15.19	53.83	2.38042	8.47188e-07	1.42544e-05	9.73	54.86	1.69201	0.000315392	0.00252922	11.24	47.03	2.01325	0.000903078	0.00667042		-0.507905		-0.321234
Unigene21820_All	4409	0	33.97	6.57498	5.6e-07	9.43e-06	0	14.94	5.76002	3.63164e-05	0.000376024	0	40.44	6.46532	5.91088e-06	8.19166e-05	0	26.87	6.5594	2.42741e-06	4.42875e-05		0.814961		-0.0940778
Unigene22165_All	3170	0	22.59	5.95932	1.41e-05	0.000160019	0	35.57	7.03114	4.21883e-08	1.01248e-06	0	54.4	6.66614	3.3162e-06	4.93893e-05	0	28.67	6.53871	3.1571e-06	5.55666e-05		-1.07182		0.127432
Unigene22896_All	2815	0	17.97	5.7659	3.01e-05	0.000310363	0	15.35	6.02806	8.41871e-06	0.000105566	0.33	31.41	5.14142	7.7761e-06	0.000104021	0	19.25	5.79153	8.79341e-05	0.00095356		-0.262158		-0.650111
Unigene25590_All	4413	7.71	50.03	2.60879	4.73e-06	6.16e-05	6.27	40.6	3.21917	5.59589e-08	1.2986e-06	3.8	87.43	3.55005	4.52041e-09	1.42094e-07	10.69	50.44	2.17842	4.18071e-05	0.000508964		-0.610383		1.37162
Unigene26508_All	3179	62.92	329	2.27369	2.92e-05	0.000301543	34.64	265.39	3.48381	3.39398e-30	2.00598e-27	63.45	352.01	1.54613	0.00347293	0.018939	23.78	191.79	2.93915	3.25027e-08	1.0606e-06		-1.21012		-1.39303
Unigene27620_All	1241	0	8.42	4.76292	0.0012082	0.00735364	0	7.57	4.96192	0.000664171	0.00450692	0	14.94	5.19905	0.000735697	0.00517367	0.34	10.14	3.71931	0.00744019	0.0377772		-0.199008		1.47975
Unigene31229_All	3095	0.93	35.18	4.51625	8.63e-07	1.38e-05	5.01	25.15	2.85325	1.34873e-05	0.000159354	1.93	42.88	3.1123	0.00388614	0.0207953	1.45	33.17	4.2624	9.30245e-06	0.000140798		1.66299		-1.15011
Unigene33113_All	1708	24.3	129.03	2.35695	0.000317845	0.00236513	13.74	160.2	3.84524	2.56852e-07	4.98809e-06	11.9	164.91	2.71039	0.00391935	0.0209456	8.02	79.63	3.02909	0.00403608	0.0229698		-1.48829		-0.318698
Unigene33285_All	1585	0.74	30.5	4.83357	7.38e-07	1.21e-05	1.4	27.6	4.34955	8.34496e-07	1.40782e-05	1.1	54.92	4.27443	1.01886e-05	0.00013136	1.48	21.28	3.65393	0.000247816	0.00227563		0.484019		0.620499
Unigene43902_All	1786	7.53	29.74	1.75547	0.00611659	0.0284252	6.38	29.19	2.659	8.45331e-06	0.000105899	6.81	49.56	2.06476	0.000154536	0.00137495	3.08	32.18	3.22811	6.62746e-06	0.000104906		-0.90353		-1.16335
Log2>0
		TSS-VS-TSR					USS-VS-USR					TTS-VS-TTR					UTS-VS-UTR						E-J		O-T
Unigene	Length	TSS-Expression	TSR-Expression	log2FoldChange(TSR/TSS)	Pvalue	Padj	USS-Expression	USR-Expression	log2FoldChange(USR/USS)	Pvalue	Padj	TTS-Expression	TTR-Expression	log2FoldChange(TTR/TTS)	Pvalue	Padj	UTS-Expression	UTR-Expression	log2FoldChange(UTR/UTS)	Pvalue	Padj
CL19928.Contig14_All	1951	0	83.1	7.61921	1.25e-09	4.05e-08	5.57	80.96	4.40313	1.1761e-14	1.10851e-12	11.23	205.03	2.96551	0.00187494	0.0113826	26.38	117.84	2.25382	1.07537e-05	0.000159261		3.21608		0.711689
CL20016.Contig13_All	2456	0	13.96	5.4398	0.000110939	0.000956079	0.35	7.05	3.62088	0.00621	0.0293209	0	12.41	4.4387	0.00749191	0.0355318	3.25	27.81	2.78457	0.00288704	0.0174183		1.81892		1.65413
CL20016.Contig25_All	1942	0	106.79	8.01799	5.49e-11	2.36e-09	0	76.64	7.94218	1.07953e-10	4.91849e-09	0	81.4	7.34568	7.2172e-08	1.69459e-06	0	55.45	6.65515	4.86361e-06	8.02065e-05		0.0758096		0.690525
CL20021.Contig10_All	1835	0	5.49	4.15635	0.00695213	0.031543	0.35	7.44	3.94497	0.00126421	0.00775244	0	11.01	4.75275	0.00276202	0.0157123	0	6.43	4.72826	0.00237013	0.0148224		0.211372		0.0244892
CL20021.Contig11_All	1783	0.29	40.34	5.79209	5.25e-08	1.16e-06	1.05	20.97	3.65224	0.00595678	0.0283043	0	37.78	6.30159	1.55444e-05	0.000189904	0	17.73	6.00203	2.92981e-05	0.000375104		2.13985		0.299559
CL20021.Contig6_All	1796	0	30.24	6.38007	1.72e-06	2.55e-05	0.38	33	6.02067	1.07814e-08	3.02126e-07	0.55	53.07	5.10404	3.44569e-07	6.79768e-06	0.32	19.06	5.02318	1.81367e-05	0.000249033		0.359408		0.0808633
CL20021.Contig8_All	1814	0.37	19.48	4.85025	1.83e-05	0.00020063	1.17	25.94	4.69138	1.27285e-07	2.68914e-06	0.58	34.01	4.55007	4.17122e-06	6.03259e-05	1.37	17.74	3.51226	7.44745e-05	0.000829834		0.158872		1.03782
CL21463.Contig48_All	2607	0	20.9	5.90894	1.71e-05	0.000189413	0	14.33	5.62264	8.13784e-05	0.000753358	0	37.49	6.43137	6.46631e-06	8.86641e-05	0	13.2	4.83077	0.00265168	0.0162363		0.2863		1.6006
CL2156.Contig4_All	1852	0	33.19	6.54864	6.5e-07	1.08e-05	3.13	43.48	4.2463	1.99512e-10	8.56847e-09	0	73.7	7.30542	7.37793e-08	1.7268e-06	0.74	27.39	4.79111	2.72775e-06	4.90063e-05		2.30234		2.51431
CL397.Contig21_All	4105	82.1	220.18	1.27021	0.0019463	0.0109654	116.91	184.04	1.26911	5.1255e-05	0.000506995	64.41	319.04	1.42931	0.00141815	0.00900466	79.02	192.07	1.29225	0.00549796	0.029537		0.00109713		0.137055
CL4070.Contig3_All	1972	1.47	33.72	3.72532	8.28e-05	0.000743295	7.5	23.37	2.16999	0.00612628	0.0289839	0	45.6	6.71171	1.65651e-06	2.67694e-05	0.64	22.61	4.57108	7.47263e-06	0.000116215		1.55533		2.14062
Unigene33285_All	1585	0.74	30.5	4.83357	7.38e-07	1.21e-05	1.4	27.6	4.34955	8.34496e-07	1.40782e-05	1.1	54.92	4.27443	1.01886e-05	0.00013136	1.48	21.28	3.65393	0.000247816	0.00227563		0.484019		0.620499

## Sheet: per
		TSS-VS-TSR					USS-VS-USR					TTS-VS-TTR					UTS-VS-UTR						E-J		O-T
Unigene	Length	TSS-Expression	TSR-Expression	log2FoldChange(TSR/TSS)	Pvalue	Padj	USS-Expression	USR-Expression	log2FoldChange(USR/USS)	Pvalue	Padj	TTS-Expression	TTR-Expression	log2FoldChange(TTR/TTS)	Pvalue	Padj	UTS-Expression	UTR-Expression	log2FoldChange(UTR/UTS)	Pvalue	Padj
CL1076.Contig3_All	1715	0	44.08	6.84179	1.76e-07	3.38e-06	1.64	38	4.91709	3.84534e-09	1.20626e-07	0	31.79	6.06279	3.80998e-05	0.000414206	0	74.37	7.51658	2.48952e-08	8.44089e-07		1.9247		-1.45379
CL10970.Contig1_All	1385	2.89	33.88	3.11688	0.000468842	0.00329651	0.76	28.35	5.2608	3.32221e-08	8.21455e-07	2.7	47.59	3.20643	1.23954e-06	2.08329e-05	1.82	31.53	3.8074	0.000105113	0.00110915		-2.14392		-0.600965
CL12367.Contig1_All	1598	0	8.08	4.68216	0.00157842	0.00921366	0.38	7.14	3.89982	0.00156788	0.00930209	0	14.14	5.25555	0.000575539	0.0042145	0	6.26	4.58861	0.00356647	0.0207338		0.782337		0.666943
CL12585.Contig2_All	1497	5.86	84.94	3.71122	3.36e-12	1.84e-10	5.07	104.55	4.80806	1.54137e-09	5.3513e-08	8.66	100.07	2.65784	9.16804e-05	0.000881458	5.47	146.67	4.4886	3.33507e-11	2.43743e-09		-1.09685		-1.83076
CL1384.Contig8_All	1003	50.2	371.05	2.76685	4.8e-22	1.1e-19	73.57	281.14	2.52158	4.22252e-24	1.37857e-21	46.75	516.66	2.7283	2.30728e-10	9.7159e-09	76.07	402.88	2.49159	2.91125e-14	4.23605e-12		0.245274		0.236715
CL1417.Contig6_All	1680	11.04	916.26	5.96348	4.42e-21	9.04e-19	29.41	266.38	3.77662	2.65772e-07	5.13688e-06	16.33	141.5	2.36813	0.000287637	0.00233743	11.44	945.65	5.8186	1.04303e-12	1.08751e-10		2.18685		-3.45047
CL15059.Contig2_All	1214	0	9.43	4.92337	0.000720151	0.00474974	0	9.38	5.33073	0.000166768	0.00139396	0	23.17	5.84998	6.91316e-05	0.00069114	0	8.51	4.92216	0.00142242	0.0097412		-0.407354		0.927821
CL16812.Contig105_All	1258	1.42	17.07	3.29066	0.000246619	0.00189973	4.56	22.18	2.78112	9.39287e-06	0.000116033	0.3	28.51	4.92567	2.59074e-05	0.00029646	4.18	18.95	2.07193	0.00529519	0.0286477		0.509536		2.85374
CL18514.Contig18_All	2667	4.42	85.19	4.00853	1.6e-05	0.000178758	0	42.88	7.21714	1.78453e-08	4.71951e-07	7.09	121.5	3.03168	0.00064056	0.00460684	5.54	64.33	3.23197	0.0074311	0.037742		-3.20862		-0.200289
CL18514.Contig8_All	2844	0	40.27	6.6988	3.96e-07	6.95e-06	0	32.69	6.89565	9.77541e-08	2.12819e-06	0	49.78	6.77336	1.2903e-06	2.15665e-05	0	46.61	7.19458	9.19899e-08	2.64093e-06		-0.196855		-0.421219
CL19386.Contig17_All	816	0	7.74	4.62675	0.0018575	0.0105488	0	7.72	5.11724	0.000360193	0.00268595	0.3	14.49	4.07303	0.00101233	0.00678233	0	14.89	5.80681	6.92139e-05	0.000780997		-0.490497		-1.73378
CL19784.Contig23_All	855	0.64	36.9	5.09214	1.36e-07	2.69e-06	0.38	33.33	6.05965	1.07473e-08	3.01341e-07	0.28	44.62	5.52366	1.21483e-06	2.04724e-05	0.66	46.27	5.57993	5.46601e-09	2.25036e-07		-0.967504		-0.056277
CL20265.Contig11_All	2211	0	44.33	6.85075	1.69e-07	3.27e-06	0	52.62	7.59795	8.96694e-10	3.31311e-08	0.3	74.46	6.16371	3.28303e-08	8.45805e-07	0	42.51	7.13219	1.39551e-07	3.76686e-06		-0.747202		-0.968483
CL20265.Contig5_All	2225	0	25.31	6.21094	3.79e-06	5.07e-05	0.7	24.06	5.0036	1.52375e-07	3.15801e-06	0.61	44.55	4.89705	8.41575e-07	1.48627e-05	0.37	24.81	5.16124	1.52545e-05	0.000214916		1.20734		-0.264191
CL20627.Contig4_All	1105	2.3	23.29	3.02389	4.21e-05	0.000414475	4.33	17.04	2.53559	0.00123842	0.00762017	0.94	30.3	3.96689	1.49106e-05	0.000183038	1.7	19.66	3.30477	7.54863e-05	0.000839409		0.488298		0.662123
CL20762.Contig13_All	1082	0	10.15	4.99272	0.000583092	0.0039688	0	7.9	5.08706	0.000444362	0.00321017	0	6.86	4.21518	0.0100937	0.045244	0	5.8	4.56639	0.00370342	0.021386		-0.0943446		-0.351211
CL20825.Contig3_All	1487	7.68	186.2	4.39436	5.63e-25	1.76e-22	15.25	153.94	3.89862	6.90324e-23	1.97534e-20	6.89	176.22	3.73918	1.99142e-10	8.5339e-09	9.42	148.07	3.76746	1.71247e-10	1.0434e-08		0.495736		-0.0282726
CL20825.Contig4_All	2138	2.35	120.44	5.35079	3.24e-18	4.53e-16	8.66	87.68	3.85344	3.66301e-14	3.21808e-12	3.28	117.78	4.23491	2.89392e-13	2.13746e-11	7.44	72.54	3.20202	1.63692e-08	5.84948e-07		1.49735		1.03288
CL21201.Contig16_All	1075	0.74	30.2	4.8415	7.7e-07	1.25e-05	1.75	24.14	3.82161	4.83007e-05	0.000482162	1.74	24.12	2.67231	0.00778924	0.0367026	2.48	25.27	3.00396	0.00258778	0.0159158		1.01989		-0.331651
CL21243.Contig2_All	2332	9.06	69.88	2.83922	2.86e-08	6.74e-07	6.85	59.59	3.64983	3.65575e-13	2.66867e-11	0.83	98.1	5.55236	8.33967e-11	3.86014e-09	3.1	77.5	4.55877	6.46532e-13	7.12026e-11		-0.810612		0.993593
CL21248.Contig1_All	1038	1.03	55.02	5.19043	1.77e-08	4.41e-07	0.76	29.47	5.27583	7.85232e-08	1.75499e-06	0.28	45.86	5.4783	4.11831e-06	5.96833e-05	0.68	41.9	5.46956	1.30023e-08	4.80116e-07		-0.0853996		0.00873757
CL21286.Contig37_All	1061	0.29	26.47	5.23638	1.87e-06	2.73e-05	0.76	34.68	5.45586	1.12138e-08	3.12634e-07	0	35.91	6.29967	1.28444e-05	0.000160533	0	36.67	6.82411	7.20877e-07	1.55419e-05		-0.219486		-0.524442
CL21332.Contig35_All	2021	30.35	245.74	2.91516	2.48e-05	0.000262097	19.54	205.09	3.73207	1.32923e-06	2.11464e-05	24.26	231.02	2.43297	1.41624e-08	3.96889e-07	10.01	151.76	3.79859	1.33521e-10	8.3907e-09		-0.816912		-1.36562
CL21409.Contig15_All	847	1.73	15.34	2.8287	0.00239452	0.013064	0	12.59	5.62621	5.73288e-05	0.000558846	0.83	24.5	3.57894	0.000426681	0.00327023	0.37	18.52	4.95113	2.69249e-05	0.000349057		-2.79751		-1.37219
CL3042.Contig6_All	915	0	14.7	5.50115	8.68e-05	0.000774548	0	13.09	5.78234	2.5933e-05	0.000281043	0	16.78	5.43248	0.000319594	0.00255798	0	12.29	5.25636	0.000551358	0.00443442		-0.281188		0.176115
CL3042.Contig8_All	898	0	8.91	4.80941	0.00112089	0.00690198	0	12.01	5.70266	3.63835e-05	0.000376605	0	14.22	5.07313	0.00113156	0.00745145	0	10.44	5.08793	0.000909539	0.00670999		-0.893255		-0.0147942
CL3131.Contig10_All	1497	0	196.27	8.59972	1.35e-12	7.94e-11	0	77.57	7.95119	1.09926e-10	4.9991e-09	0	242.8	8.76733	6.89434e-12	3.94585e-10	0.64	249.86	7.86397	4.6878e-19	1.54977e-16		0.648528		0.903364
CL3131.Contig11_All	1539	0	18.14	5.12024	0.000629138	0.00423484	0	4.08	4.17594	0.00639795	0.0300666	0	18.1	5.40569	0.00045064	0.00342314	0	13.76	5.39388	0.000351484	0.00304543		0.944293		0.0118177
CL3131.Contig12_All	1493	0.37	194.46	7.90207	8.81e-16	8.81e-14	0.73	78.76	6.68846	4.55053e-15	4.5639e-13	0	275.78	8.93507	1.75321e-12	1.12042e-10	1.08	262.43	7.5758	6.45052e-21	2.88485e-18		1.21361		1.35927
CL3401.Contig4_All	1075	36.93	880.31	4.41384	2.62e-45	4.2e-42	74.39	747.86	3.90779	4.8785e-57	1.37079e-53	20.34	537.2	3.80029	5.20193e-15	5.21482e-13	27.62	489.09	3.93603	4.78498e-12	4.26696e-10		0.506046		-0.13574
CL3476.Contig27_All	3664	0	23.09	5.95953	1.65e-05	0.000183884	0	24.69	6.41644	2.46627e-06	3.62294e-05	0	33.04	6.21054	2.05809e-05	0.00024285	0	9.9	4.67545	0.00423335	0.0238574		-0.456913		1.53509
CL3476.Contig41_All	2569	0	58.73	7.26131	1.14e-08	2.97e-07	0	44.71	7.27043	1.1305e-08	3.1492e-07	0	121.94	7.89956	2.48157e-09	8.28298e-08	0	76.97	7.71596	5.8152e-09	2.3747e-07		-0.00911929		0.183599
CL3476.Contig80_All	2789	1.47	72.32	5.30432	9.53e-11	3.89e-09	1.52	49.46	5.2647	1.28132e-10	5.73872e-09	0	84.12	7.47537	2.85728e-08	7.45175e-07	0	71.26	7.67265	5.92181e-09	2.40986e-07		0.0396183		-0.197279
CL3508.Contig2_All	1467	0.68	19.85	4.11498	0.000316116	0.0023534	1.52	26.35	4.24029	4.93648e-05	0.00049079	1.66	31.79	3.36949	0.000610984	0.00442925	2.86	72.08	4.58419	1.57427e-07	4.17769e-06		-0.125309		-1.2147
CL477.Contig15_All	1833	0.29	14.88	4.42426	0.000167644	0.00136538	0.7	15.47	4.3126	3.52339e-05	0.000366498	0	19.68	5.61874	0.000167091	0.0014717	0	12.52	5.44212	0.000274609	0.00247739		0.111668		0.176623
CL6134.Contig10_All	1126	0	13.9	5.44107	0.00011094	0.000956079	0	15.4	6.00291	9.90904e-06	0.000121673	0	29.06	6.14559	2.09316e-05	0.000246493	0	13.54	5.65719	0.000117966	0.00122267		-0.561837		0.4884
CL6134.Contig5_All	1329	0	11.48	5.20384	0.000267253	0.00203387	0.41	8.61	4.19896	0.000495559	0.00351882	0.3	14.19	4.04207	0.00104561	0.0069729	0	8.82	4.94558	0.00136559	0.00941824		1.00488		-0.903512
CL6388.Contig4_All	1169	4.28	41.6	3.15286	1.34e-05	0.000153151	4.59	35.75	3.42518	4.14117e-08	9.96217e-07	1.24	44.9	3.99426	5.31522e-05	0.000552116	1.43	28.72	3.50026	0.00889132	0.0435988		-0.27232		0.493999
CL6563.Contig2_All	1084	1.57	1106.85	8.87297	1.3e-44	1.96e-41	3.83	1290.69	8.80184	4.11998e-70	1.96159e-66	1.82	830	7.68465	1.27665e-22	3.67606e-20	0.69	522.03	8.70101	3.98268e-19	1.32662e-16		0.0711283		-1.01636
CL7236.Contig3_All	1190	0	10.35	5.02906	0.000528238	0.00364825	0	6.08	4.24448	0.00633701	0.0298195	0	20.68	5.69235	0.000130327	0.00118982	0.34	8.83	3.95827	0.0020729	0.0132784		0.784581		1.73408
CL8033.Contig8_All	1195	0.71	16.87	3.97561	0.000171942	0.0013951	3.51	15.22	2.64103	0.000808013	0.00532059	2.1	28.58	2.83065	0.00183812	0.0111915	3.84	24.66	2.72389	0.000818929	0.0061599		1.33457		0.106758
CL8066.Contig7_All	991	0	17.22	5.67592	4.38e-05	0.000428284	0	11.44	5.63828	4.71547e-05	0.000472352	0.63	15.56	3.52864	0.00142415	0.00903788	0	14.13	5.66297	0.000136767	0.00138257		0.0376388		-2.13433
CL8838.Contig2_All	1436	0	10.37	5.06172	0.000455443	0.00321483	0.76	6.15	3.10214	0.00641487	0.0301313	0.61	16.2	3.56276	0.000820632	0.00568036	0.34	13.38	4.46297	0.000221518	0.00207248		1.95958		-0.900212
CL946.Contig12_All	1897	0.68	52.07	5.57582	1.55e-09	4.9e-08	0.41	56.17	6.77932	1.46124e-11	7.89845e-10	1.27	45.18	4.21318	6.99859e-07	1.26507e-05	1.05	33.52	4.65114	2.94243e-07	7.16231e-06		-1.2035		-0.437959
CL992.Contig4_All	1233	0	235.8	8.98084	2.69e-14	2.12e-12	0	226.71	9.39593	2.62089e-16	3.18599e-14	0	255.73	8.82305	3.84207e-12	2.31333e-10	3.69	159.31	5.22448	9.3168e-08	2.66901e-06		-0.415084		3.59857
Unigene10491_All	1375	0	37.09	6.68612	3.06e-07	5.53e-06	0	17.5	6.08178	8.29548e-06	0.00010425	0	24.45	5.86391	7.08064e-05	0.000705918	0.37	10.21	4.01275	0.00160656	0.0107827		0.604346		1.85116
Unigene13953_All	1816	4.49	104.63	4.21957	2.03e-14	1.65e-12	13.85	70.35	2.92748	5.58973e-13	3.94439e-11	1.38	92.25	4.64616	1.23784e-06	2.08082e-05	8.56	46	2.26205	0.00217487	0.0138145		1.2921		2.38411
Unigene17433_All	1246	2	31.8	3.52848	0.000330001	0.00244199	1.17	11.46	3.52542	0.000380314	0.00281486	1.82	23.72	2.5848	0.0113977	0.0497965	0.74	11.67	3.44894	0.00520228	0.028263		0.00305313		-0.864136
Unigene18257_All	1583	2.35	119.24	5.33863	4.95e-18	6.75e-16	1.55	95.37	6.21863	2.33616e-18	3.81936e-16	1.24	65.13	4.63793	4.66999e-08	1.15867e-06	0.37	53.72	6.23528	2.72328e-08	9.12116e-07		-0.880006		-1.59735
Unigene20003_All	901	104.88	573.65	2.25936	3.47e-06	4.7e-05	58.92	469.71	3.43588	6.92671e-10	2.61971e-08	69.32	655.32	2.39495	2.84163e-07	5.73591e-06	54.46	502.11	3.24419	3.67728e-14	5.24669e-12		-1.17651		-0.849241
Unigene20007_All	1999	0.37	113.22	7.20864	4.88e-13	3.1e-11	0	76.88	8.08431	2.26651e-11	1.17937e-09	0.33	133.85	7.01506	4.30271e-11	2.10335e-09	0	69.2	7.61446	9.22274e-09	3.55451e-07		-0.875671		-0.599401
Unigene21226_All	1589	0.64	26.44	4.62163	2.69e-06	3.76e-05	0	15.08	5.9131	1.54121e-05	0.000178926	0.66	28.69	4.3399	2.20743e-05	0.000258167	0.37	29.86	5.57189	7.29083e-07	1.56997e-05		-1.29147		-1.232
Unigene21674_All	1834	0	164.84	8.44126	3.53e-12	1.92e-10	1.14	122.09	6.8842	8.37229e-19	1.45246e-16	0.61	89.1	5.8969	2.34544e-10	9.85069e-09	0	127.65	8.36653	8.0082e-11	5.31892e-09		1.55705		-2.46962
Unigene22563_All	1200	0.71	56.4	5.66604	4.89e-09	1.38e-07	3.89	53.86	4.2882	1.2265e-13	9.79151e-12	3.96	75.04	2.99723	0.00202926	0.0121564	0	36.12	6.66798	1.92505e-06	3.62287e-05		1.37783		-3.67074
Unigene25643_All	1945	0	22.61	5.96637	1.55e-05	0.00017369	0	7.87	5.11759	0.000388741	0.00286832	0.61	36.14	4.6011	6.04806e-06	8.35741e-05	0.34	17.86	4.68329	0.000133039	0.00135248		0.848784		-0.0821915
Unigene31414_All	1939	0	24.86	6.15423	5.5e-06	7.04e-05	0	19.04	6.27619	2.68849e-06	3.9075e-05	0	44.11	6.65801	2.59332e-06	3.97851e-05	0	13.99	5.54001	0.000264027	0.00239887		-0.121957		1.118
Unigene33256_All	1533	44.33	195.66	2.02464	4.77e-08	1.06e-06	13.68	146.72	3.7235	1.08036e-06	1.76425e-05	17.42	156.41	2.35665	9.88361e-08	2.24569e-06	7.55	106.38	3.70535	5.85329e-11	4.02574e-09		-1.69886		-1.3487
Unigene34493_All	1545	10.12	68.24	2.59141	2.29e-07	4.28e-06	4.93	48.24	3.73625	6.9077e-05	0.000655625	2.73	48.04	3.26051	1.32478e-06	2.20443e-05	2.05	29.77	3.3639	0.00204086	0.0131113		-1.14484		-0.103387
Unigene34525_All	2526	3.81	90.37	4.37579	7.29e-13	4.5e-11	5.45	65.51	4.1261	4.50651e-14	3.8972e-12	6.62	110.87	3.13065	2.82337e-07	5.70364e-06	5.87	69.02	3.37003	4.0481e-07	9.43778e-06		0.249689		-0.239376
Unigene34818_All	2578	16.42	123.42	2.76003	3.08e-05	0.000315954	1.4	123.84	6.56216	1.81567e-20	3.89498e-18	7.28	115.93	3.19893	2.40392e-06	3.72038e-05	2.58	77.2	4.60647	1.66899e-06	3.2029e-05		-3.80213		-1.40754
Unigene35985_All	1290	0.29	74	6.65732	4.99e-11	2.16e-09	0	52.61	7.58569	1.10506e-09	3.98505e-08	0	84.71	7.45292	3.59487e-08	9.16481e-07	0	60.5	7.30292	7.75974e-08	2.27623e-06		-0.928367		0.150004
Unigene5974_All	752	2.3	29.12	3.34272	4e-06	5.31e-05	3.68	18.31	2.68593	0.000257642	0.00201876	2.21	53.97	3.61614	2.74846e-05	0.000311867	4.18	37.52	3.17119	6.89978e-05	0.000779057		0.656789		0.444947
Unigene6564_All	1654	0.29	158.63	7.65806	4.06e-15	3.67e-13	0.76	106.09	7.06759	1.51884e-15	1.65816e-13	0.3	106.03	6.76921	1.87902e-10	8.1026e-09	0.66	112.17	6.73379	5.01057e-13	5.67141e-11		0.59047		0.0354265
Unigene8091_All	914	0	53.96	7.15515	1.94e-08	4.76e-07	0	38.19	7.19901	1.24168e-08	3.42494e-07	0	57.43	7.0047	4.20559e-07	8.09087e-06	0	52.17	7.35879	4.3349e-08	1.36206e-06		-0.0438609		-0.354093
Unigene9415_All	1667	0	9.04	4.74184	0.00143509	0.0085068	0	6.96	4.84734	0.000961398	0.00615147	1.13	22.8	3.19073	0.000612807	0.00443954	0	14.55	5.76852	7.48754e-05	0.000833747		-0.1055		-2.57778
Log2>0
		TSS-VS-TSR					USS-VS-USR					TTS-VS-TTR					UTS-VS-UTR						E-J		O-T
Unigene	Length	TSS-Expression	TSR-Expression	log2FoldChange(TSR/TSS)	Pvalue	Padj	USS-Expression	USR-Expression	log2FoldChange(USR/USS)	Pvalue	Padj	TTS-Expression	TTR-Expression	log2FoldChange(TTR/TTS)	Pvalue	Padj	UTS-Expression	UTR-Expression	log2FoldChange(UTR/UTS)	Pvalue	Padj
CL12367.Contig1_All	1598	0	8.08	4.68216	0.00157842	0.00921366	0.38	7.14	3.89982	0.00156788	0.00930209	0	14.14	5.25555	0.000575539	0.0042145	0	6.26	4.58861	0.00356647	0.0207338		0.782337		0.666943
CL1384.Contig8_All	1003	50.2	371.05	2.76685	4.8e-22	1.1e-19	73.57	281.14	2.52158	4.22252e-24	1.37857e-21	46.75	516.66	2.7283	2.30728e-10	9.7159e-09	76.07	402.88	2.49159	2.91125e-14	4.23605e-12		0.245274		0.236715
CL16812.Contig105_All	1258	1.42	17.07	3.29066	0.000246619	0.00189973	4.56	22.18	2.78112	9.39287e-06	0.000116033	0.3	28.51	4.92567	2.59074e-05	0.00029646	4.18	18.95	2.07193	0.00529519	0.0286477		0.509536		2.85374
CL20627.Contig4_All	1105	2.3	23.29	3.02389	4.21e-05	0.000414475	4.33	17.04	2.53559	0.00123842	0.00762017	0.94	30.3	3.96689	1.49106e-05	0.000183038	1.7	19.66	3.30477	7.54863e-05	0.000839409		0.488298		0.662123
CL20825.Contig4_All	2138	2.35	120.44	5.35079	3.24e-18	4.53e-16	8.66	87.68	3.85344	3.66301e-14	3.21808e-12	3.28	117.78	4.23491	2.89392e-13	2.13746e-11	7.44	72.54	3.20202	1.63692e-08	5.84948e-07		1.49735		1.03288
CL3131.Contig10_All	1497	0	196.27	8.59972	1.35e-12	7.94e-11	0	77.57	7.95119	1.09926e-10	4.9991e-09	0	242.8	8.76733	6.89434e-12	3.94585e-10	0.64	249.86	7.86397	4.6878e-19	1.54977e-16		0.648528		0.903364
CL3131.Contig11_All	1539	0	18.14	5.12024	0.000629138	0.00423484	0	4.08	4.17594	0.00639795	0.0300666	0	18.1	5.40569	0.00045064	0.00342314	0	13.76	5.39388	0.000351484	0.00304543		0.944293		0.0118177
CL3131.Contig12_All	1493	0.37	194.46	7.90207	8.81e-16	8.81e-14	0.73	78.76	6.68846	4.55053e-15	4.5639e-13	0	275.78	8.93507	1.75321e-12	1.12042e-10	1.08	262.43	7.5758	6.45052e-21	2.88485e-18		1.21361		1.35927
CL477.Contig15_All	1833	0.29	14.88	4.42426	0.000167644	0.00136538	0.7	15.47	4.3126	3.52339e-05	0.000366498	0	19.68	5.61874	0.000167091	0.0014717	0	12.52	5.44212	0.000274609	0.00247739		0.111668		0.176623
CL7236.Contig3_All	1190	0	10.35	5.02906	0.000528238	0.00364825	0	6.08	4.24448	0.00633701	0.0298195	0	20.68	5.69235	0.000130327	0.00118982	0.34	8.83	3.95827	0.0020729	0.0132784		0.784581		1.73408
CL8033.Contig8_All	1195	0.71	16.87	3.97561	0.000171942	0.0013951	3.51	15.22	2.64103	0.000808013	0.00532059	2.1	28.58	2.83065	0.00183812	0.0111915	3.84	24.66	2.72389	0.000818929	0.0061599		1.33457		0.106758
Unigene10491_All	1375	0	37.09	6.68612	3.06e-07	5.53e-06	0	17.5	6.08178	8.29548e-06	0.00010425	0	24.45	5.86391	7.08064e-05	0.000705918	0.37	10.21	4.01275	0.00160656	0.0107827		0.604346		1.85116
Unigene13953_All	1816	4.49	104.63	4.21957	2.03e-14	1.65e-12	13.85	70.35	2.92748	5.58973e-13	3.94439e-11	1.38	92.25	4.64616	1.23784e-06	2.08082e-05	8.56	46	2.26205	0.00217487	0.0138145		1.2921		2.38411
Unigene5974_All	752	2.3	29.12	3.34272	4e-06	5.31e-05	3.68	18.31	2.68593	0.000257642	0.00201876	2.21	53.97	3.61614	2.74846e-05	0.000311867	4.18	37.52	3.17119	6.89978e-05	0.000779057		0.656789		0.444947
Unigene6564_All	1654	0.29	158.63	7.65806	4.06e-15	3.67e-13	0.76	106.09	7.06759	1.51884e-15	1.65816e-13	0.3	106.03	6.76921	1.87902e-10	8.1026e-09	0.66	112.17	6.73379	5.01057e-13	5.67141e-11		0.59047		0.0354265
